# Supplementary material for: Particularities of the changes in young swimmers’ body adaptation to the stimuli of physical and mental stress in sports training process
Source: PeerJ. 2021 Jun 23;9:e11659. doi: 10.7717/peerj.11659 (PMC8234917; doi:10.7717/peerj.11659)
Supplement: Supplemental Information 1 — Volume effort training monitored in macrocycle 2; Psychological test results; Volume of training means per effort zones at the beginning and the end of the research; Results of the biochemical tests during training sessions in parallel with the performances of the motor tests; Dynamics of the metabolic and hormonal biochemical parameters in competitions; Correlation of the variables of research indicators in training; Correlation of the induced stress variables in competition. [file peerj-09-11659-s001.xlsx]

## Sheet: Sheet1
			Appendix Table 1		Graph of mental, motor and biochemical indicators monitoring in macrocycle 2,
					2015-2016 plan
	Periods	Duration (weeks)	Athlets / weeks	Swimming styles	Volume training									Total volume
					Days of train.	Days of rest	In water train.	Off water train.	Total train.	Hours in water	Hours off water	Total hours		(km)
			A1.-w1	backstroke	6	1	8	5	13	16	3	19		42
			w2		6	1	9	5	14	18	2.3	20.3		45
			w3		6	1	9	4	13	22	2	24		50
			w4		6	1	9	4	13	22	2	24		55
			Total		24	4	35	18	53	78	9.3	87.3		192
			A2.-w1	butterflay	6	1	8	5	13	16	5	21		42
		4	w2		6	1	9	5	14	18	2.3	20.3		42
			w3		6	1	9	5	14	22	3	23		45
			w4		6	1	9	5	14	22	3	25		50
			Total		24	4	35	20	55	78	13.3	89.3		179
			A3.-w1	breaststroke	6	1	8	5	13	16	5	21		40
			w2		6	1	9	5	14	18	2.3	20.3		42
	Mesocycle 1 (general )		w3		6	1	9	5	14	22	3	23		45
			w4		6	1	9	5	14	22	3	25		50
			Total		24	4	35	20	55	78	13.3	89.3		177
			A4.-s1	backstroke	6	1	8	5	13	10	5	15		40
			s2		6	1	9	3	12	18	3	21		45
			s3		6	1	9	3	12	22	3	25		45
			s4		6	1	9	3	12	24	3	27		50
			s5		6	1	9	2	11	22	2	24		45
			Total		30	5	44	16	60	96	16	112		225
			A5.-w1	front crawl stroke	6	1	8	5	13	10	5	15		30
		5	w2		6	1	9	3	12	18	3	21		35
			w3		6	1	9	3	12	22	3	25		38
			w4		6	1	9	3	12	24	3	27		45
			w5		6	1	9	2	11	22	2	24		40
			Total		30	5	44	16	60	96	16	112		188
			A6.-w1	front crawl stroke	6	1	8	5	13	10	5	15		30
			w2		6	1	9	3	12	18	3	21		35
			w3		6	1	9	3	12	22	3	25		38
			w4		6	1	9	3	12	24	3	27		45
			w5		6	1	9	2	11	22	2	24		40
			Total		30	5	44	16	60	96	16	112		188
			A1.-w1	backstroke	6	1	9	4	13	20	2	22		55
			w2		6	1	9	4	13	20	2	22		53
			w3		6	1	9	3	12	18	2	20		45
			Total		18	3	27	11	38	58	6	64		153
			A2.-w1	butterflay	6	1	9	4	13	20	2	22		48
			w2		6	1	8	4	12	20	3	23		53
		3	w3		6	1	9	3	12	18	3	21		43
			Total		18	3	26	11	37	58	8	66		144
			A3.-w1	breaststroke	6	1	9	4	13	20	2	22		45
			w2		6	1	8	4	12	20	3	23		50
			w3		6	1	9	3	12	18	3	21		43
			Total		18	3	26	11	37	58	8	66		138
			A4.-w1	brackstroke	6	1	9	2	11	24	2	26		50
	Mesocycle 2 (Specific)		w2		6	1	9	3	12	26	3	29		55
			w3		6	-	8	2	10	24	2	26		50
			w4		6	1	8	2	10	28	2	30		60
			w5		6	1	9	2	11	24	2	26		50
			Total		30	4	43	11	54	126	11	137		265
			A5.-w1	front crawl stroke	6	1	9	2	11	24	2	26		45
			w2		6	1	9	3	12	26	3	29		45
		5	w3		6	-	8	2	10	24	2	26		38
			w4		6	1	8	2	10	28	2	30		45
			w5		6	1	9	2	11	24	2	26		45
			Total		30	4	43	11	54	126	11	137		218
			A6.-w1	front crawl stroke	6	1	9	3	12	26	3	29		45
			w2		6	-	8	2	10	24	2	26		38
			w3		6	1	8	2	10	28	2	30		45
			w4		6	1	9	2	11	24	2	26		45
			w5		6	1	9	2	11	24	2	26		45
			Total		30	4	43	11	54	126	11	137		218
			A1.-w1	breackstroke	6	1	9	2	11	18	1	19		30
			w2		7	-	9	0	9	18	0	18		30
			Total		13	1	18	2	20	36	1	37		60
			A2.-w1	butterflay	6	1	9	3	12	18	3	21		30
			w2		7	-	9	2	11	18	2	20		30
		2	Total		13	1	18	5	23	36	5	41		60
			A3.-w1	breaststroke	6	1	9	3	12	18	3	21		30
			w2		7	-	9	2	11	18	2	20		30
			Total		13	1	18	5	23	36	5	41		60
			A4.-w1	backstroke	6	1	9	2	11	24	2	26		44
	Mesocycle 3		w2		6	1	9	2	11	15	1	16		34
	Precompetitive		Total		12	2	18	4	22	39	3	42		78
			A5.-w1	front crawl stroke	6	1	9	2	11	24	2	26		40
			w2		6	1	9	2	11	15	1	16		25
			Total		12	2	18	4	22	39	3	42		65
			A6.-w1	front crawl stroke	6	1	9	2	11	24	2	26		40
			w2		6	1	9	2	11	15	1	16		25
			Total		12	2	18	4	22	39	3	42		65
	Mesocycle 4		A1.	brackstroke	3	-	4	0	4	8	0	38	8	12
	Competitive		A2.	butterflay	3	-	4	0	4	8	0	38	8	12
			A3.	breaststroke	3	-	4	0	4	8	0	38	8	12
		1	A4.	sbackstroke	7	-	8	2	10	8	1	33	9	12
			A5.	front crawl stroke	7	-	8	2	10	8	1	33	9	12
			A6.	front crawl stroke	7	-	8	2	10	8	1	33	9	12
			Mean		5		6	1	7	8	0.5	35.5	8.5	12
	Periods	Duration (weeks)	Athlets	Siwm. style	Volume training									Total
														volume
					Days of train.	Days of rest	In water train.	Off water train.	Total train.	Hours in water	Hours off water	Total hours		(km)
		4	A1.	backstroke	24	4	35	18	53	78	9.3	87.3		192
	Mesocycle 1		A2.	butterflay	24	4	35	20	55	78	13.3	89.3		179
	general		A3.	breaststroke	24	4	35	20	55	78	13.3	89.3		177
		5	A4.	backstroke	30	5	44	16	60	96	16	112		225
			A5.	front crawl stroke	30	5	44	16	60	96	16	112		188
			A6.	front crawl stroke	30	5	44	16	60	96	16	112		188
		3	A1.	backstroke	18	3	27	11	38	58	6	64		153
	Mesocycle 2		A2.	butterflay	18	3	26	11	37	58	8	66		144
	specific		A3.	breaststroke	18	3	26	11	37	58	8	66		138
		5	A4.	backstroke	30	4	43	11	54	126	11	137		265
			A5.	front crawl stroke	30	5	44	16	60	96	16	112		188
			A6.	front crawl stroke	30	4	43	11	54	126	11	137		218
	Mesocycle 3		A1.	backstroke	13	1	18	2	20	36	1	37		60
	precompetitive		A2.	butterflay	13	1	18	5	23	36	5	41		60
		2	A3.	breaststroke	13	1	18	5	23	36	5	41		60
			A4.	backstroke	12	2	18	4	22	39	3	42		78
			A5.	front crawl stroke	12	2	18	4	22	39	3	42		78
			A6.	front crawl stroke	12	2	18	4	22	39	3	42		78
	Mesocycle 4		A1.	backstroke	3	-	4	0	4	8	0	38	8	12
	competitive		A2.	butterflay	3	-	4	0	4	8	0	38	8	12
		1	A3.	breaststroke	3	-	4	0	4	8	0	38	8	12
			A4.	backstroke	7	-	8	2	10	8	1	33	9	12
			A5.	front crawl stroke	7	-	8	2	10	8	1	33	9	12
			A6.	front crawl stroke	7	-	8	2	10	8	1	33	9	12

## Sheet: Sheet2
Cohen & Williamson Test			stage basal (T1)														stage I (T2)																stage II (T3)																stage IV (T4)
athletes	item1	item2	item3	item4	item5	item6	item7	item8	item9	item10	item11	item12	item13	item14	sum		item1	item2	item3	item4	item5	item6	item7	item8	item9	item10	item11	item12	item13	item14	sum		item1	item2	item3	item4	item5	item6	item7	item8	item9	item10	item11	item12	item13	item14	sum		item1
A1	2	2	2	1	2	2	2	2	2	2	2	3	2	1	27		1	2	3	2	2	2	3	2	1	1	3	3	1	2	28		2	3	3	4	3	2	2	2	1	1	3	4	2	4	36		3
A2	1	1	2	3	2	3	1	2	3	3	1	2	1	1	26		1	2	3	2	2	2	3	2	1	1	3	3	1	2	28		1	2	2	2	3	3	2	2	2	2	2	2	2	2	29		1
A3	1	2	3	1	1	1	1	1	3	1	2	3	1	1	22		1	2	1	1	1	1	3	4	1	1	1	3	2	2	24		1	2	3	2	2	2	3	2	1	1	3	3	1	2	28		2
A4	2	2	2	1	1	1	2	2	1	2	2	5	3	2	28		2	2	2	2	2	2	2	2	1	2	2	5	3	2	31		2	2	2	2	2	2	2	3	1	2	3	3	2	2	30		3
A5	1	2	3	2	2	2	3	2	1	1	3	3	1	2	28		2	3	3	2	2	2	3	3	1	1	3	3	1	2	31		3	3	3	3	2	2	2	2	2	1	4	4	2	2	35		1
A6	2	2	2	2	1	2	1	3	2	2	5	5	3	3	35		3	3	3	3	2	2	2	2	2	1	4	5	2	2	36		3	3	3	3	2	2	2	2	2	1	5	5	2	1	36		3
			stage basal (T1)
Cohen Perceived Stress Test (CPST)																	stage I (T2)																stage II (T3)
athletes	item1	item2	item3	item4	item5	item6	item7	item8	item9	item10	sum						item1	item2	item3	item4	item5	item6	item7	item8	item9	item10	sum						item1	item2	item3	item4	item5	item6	item7	item8	item9	item10	sum						stage IV (T4)
A1	1	2	1	3	1	1	3	3	1	0	16						2	2	2	3	3	2	3	3	2	2	24						2	3	3	2	2	2	2	2	4	3	25						item1
A2	1	1	3	2	2	1	2	3	1	0	16						2	2	3	2	2	2	2	2	2	2	21						2	3	3	2	2	2	2	2	2	2	22						2
A3	1	1	0	3	3	1	3	3	0	0	15						0	0	2	4	3	1	3	3	1	1	18						1	2	2	4	4	1	4	3	0	0	21						2
A4	1	1	1	3	3	1	4	3	1	1	19						1	3	3	3	2	2	2	2	2	3	23						1	1	1	3	3	2	4	3	1	2	21						2
A5	0	0	2	3	4	0	2	2	2	1	16						2	2	3	3	2	1	2	2	1	1	19						1	0	3	3	3	2	4	4	0	2	22						1
A6	2	1	2	3	3	2	3	3	1	2	22						1	1	2	3	4	2	3	3	2	1	22						2	3	3	3	2	2	2	2	3	2	24						0
																																																	2
Sport Competition Anxiety Test				stage IV (T4)
athletes	item1	item2	item3	item4	item5	item6	item7	item8	item9	item10	item11	item12	item13	item14	item15	sum	level
A1	0	3	3	0	3	3	0	3	3	0	2	3	0	1	2	26	high
A2	0	1	1	0	1	2	0	1	2	0	2	2	0	2	1	15	low
A3	0	2	3	0	2	2	0	1	2	0	3	3	0	3	1	22	medium
A4	0	1	1	0	2	1	0	1	1	0	1	2	0	2	1	13	low
A5	0	3	3	0	3	3	0	2	3	0	3	3	0	3	2	28	high
A6	0	2	2	0	3	2	0	1	1	0	2	3	0	3	2	21	medium
Crăciun Test, 2012				stage IV (T4)
athletes	item1	item2	item3	item4	item5	item6	item7	item8	item9	sum
A1	3	2	3	2	3	3	3	4	2	25
A2	3	1	1	1	2	1	3	2	2	16
A3	4	3	4	1	4	2	1	3	4	26
A4	3	2	3	2	3	2	2	3	4	24
A5	2	4	4	1	3	4	4	4	3	29
A6	3	3	3	3	3	3	2	2	3	25
	Cognitive					Somatic					Self-confidence
athletes	item03	item06	item08	sum		item02	item04	item07	sum		item01	item05	item09	sum
A1	3	3	4	10		2	2	3	7		3	3	2	8
A2	1	1	2	4		1	1	3	5		3	2	2	7
A3	4	2	3	9		3	1	1	5		4	4	4	12
A4	3	2	3	8		2	2	2	6		3	3	4	10
A5	4	4	4	12		4	1	4	9		2	3	3	8
A6	3	3	2	8		3	3	2	8		3	3	3	9
Cohen & Williamson Test							Cohen Perceived Stress Test (CPST)
athletes	T1	T2	T3	T4			athletes	T1	T2	T3	T4		athletes	SCAT	CT-A	CT-B	CT-C
A1	27	28	36	40			A1	16	24	25	24		A1	26	10	7	8
A2	26	28	29	34			A2	16	21	22	26		A2	15	4	5	7
A3	22	24	28	30			A3	15	18	21	24		A3	22	9	5	12
A4	28	31	30	38			A4	19	23	21	23		A4	13	8	6	10
A5	28	31	35	28			A5	16	19	22	22		A5	28	12	9	8
A6	35	36	36	38			A6	22	22	24	21		A6	21	8	8	9
	T1	T2	T3	T4				T1	T2	T3	T4			SCAT	CT-A	CT-B	CT-C
Mean	27.6667	29.6667	32.3333	34.6667			Mean	17.3333	21.1667	22.5	23.3333		Mean	20.8333	8.5	6.66667	9
S.E.M.	1.72562	1.64655	1.52023	1.97765			S.E.M.	1.08525	0.945751	0.67082	0.71492		S.E.M.	2.41408	1.08781	0.666667	0.730297
S.D.	4.2269	4.0332	3.7238	4.84424			S.D.	2.65832	2.31661	1.64317	1.75119		S.D.	5.91326	2.66458	1.63299	1.78885
Variance	17.8667	16.2667	13.8667	23.4667			Variance	7.06667	5.36667	2.7	3.06667		Variance	34.9667	7.1	2.66667	3.2
Coef. Var.	0.152779	0.13595	0.115169	0.139738			Coef. Var.	0.153365	0.109446	0.0730297	0.075051		Coef. Var.	0.283837	0.31348	0.244949	0.198762
Minimum	22	24	28	28			Minimum	15	18	21	21		Minimum	13	4	5	7
Maximum	35	36	36	40			Maximum	22	24	25	26		Maximum	28	12	9	12
Sum	166	178	194	208			Sum	104	127	135	140		Sum	125	51	40	54
N	6	6	6	6			N	6	6	6	6		N	6	6	6	6
Skewness	0.602129	0.225597	-0.0575148	-0.332348			Skewness	1.00817	-0.2193	0.592593	0.181317		Skewness	-0.181779	-0.521129	0.279508	0.688919
Curtosis	-0.044442	-0.58573	-1.85447	-1.47211			Curtosis	-0.49555	-1.34324	-1.20988	-0.862004		Curtosis	-1.37559	-0.308272	-1.365	-0.65625
Mu3	34.5926	11.2593	-2.25926	-28.7407			Mu3	14.4074	-2.07407	2	0.740741		Mu3	-28.5926	-7.5	0.925926	3
Mu4	655.185	443.63	152.963	584.296			Mu4	86.8519	33.1366	9.0625	13.963		Mu4	1379.25	94.2292	8.07407	16.6667
Mean Deviation	3.2	3.6	4	4.8			Mean Deviation	2.53333	2.2	1.6	1.6		Mean Deviation	5.46667	2.2	1.6	1.6
Median	27.5	29.5	32.5	36			Median	16	21.5	22	23.5		Median	21.5	8.5	6.5	8.5
Range	13	12	8	12			Range	7	6	4	5		Range	15	8	4	5
Confidence Level of Mean(0.95)	4.43586	4.23258	3.90789	5.08372			Confidence Level of Mean(0.95)	2.78974	2.43113	1.7244	1.83776		Confidence Level of Mean(0.95)	6.20559	2.79631	1.71372	1.87729
Lower Confidence Limit of Mean	23.2308	25.4341	28.4254	29.5829			Lower Confidence Limit of Mean	14.5436	18.7355	20.7756	21.4956		Lower Confidence Limit of Mean	14.6277	5.70369	4.95295	7.12271
Upper Confidence Limit of Mean	32.1025	33.8992	36.2412	39.7504			Upper Confidence Limit of Mean	20.1231	23.5978	24.2244	25.1711		Upper Confidence Limit of Mean	27.0389	11.2963	8.38039	10.8773
Lower Quartile	26.25	28	29.25	31			Lower Quartile	16	19.5	21.25	22.25		Lower Quartile	16.5	8	5.25	8
Upper Quartile	28	31	35.75	38			Upper Quartile	18.25	22.75	23.5	24		Upper Quartile	25	9.75	7.75	9.75
Quartile Range	1.75	3	6.5	7			Quartile Range	2.25	3.25	2.25	1.75		Quartile Range	8.5	1.75	2.5	1.75
Quartile Deviation	0.875	1.5	3.25	3.5			Quartile Deviation	1.125	1.625	1.125	0.875		Quartile Deviation	4.25	0.875	1.25	0.875
Quartile Variation	3.22581	5.08475	10	10.1449			Quartile Variation	6.56934	7.69231	5.02793	3.78378		Quartile Variation	20.4819	9.85915	19.2308	9.85915
Quartile Measure of Skewness	-0.428571	0	0	-0.428571			Quartile Measure of Skewness	1	-0.230769	0.333333	-0.428571		Quartile Measure of Skewness	-0.176471	0.428571	0	0.428571
[truncated: 14 more columns]

## Sheet: Sheet3
Appendix Figure 1.Volume of the means of training in the young swimmers at the beginning and the end of the research according to the specialized styles
							beginning research (E1)
	Athlet (A1)	Initial	Final				training means	athlet 1		athlet 2		athlet 3		athlet 4		athlet 5		athlet 6
	Warm up	1200	800				R1	50		50		50		50		50		50
	T.E.		800				R2	10		10		10		10		10		10
	S2	800	1600				R3	10		10		10		10		10		10
	R1	3600	2000				Sprint	10		10		10		10		10		10
	WL	800	800				warm up - relaxation	20		20		20		20		20		20
	Relaxation	400	400				T.E	-		-		-		-		-		-
								meters	%	meters	%	meters	%	meters	%	meters	%	meters	%
	Athlet (A4)	Initial	Final				warm up - relaxation	1200	17.6	1200	18.75	1200	17.14	1200	17.14	1600	25.8	1600	25.8
	Warm up	1200	800				S1	-		-		-		-		200	3.2	200	3.2
	T.E.		800				S2	800	11.8	-		-		-		800	12.9	800	12.9
	R1	2000					R1	3600	52.9	2000	31.25	1600	22.86	1600	22.86	3200	51.6	3200	51.6
	R2	2000	2000				R2	-		2000	31.25	3000	42.86	3000	42.86	-		-
	R3		2000				WL	800	11.8	800	12.5	800	11.43	800	11.43	-		-
	WL	800	1000				Relaxation	400	5.9	400	6.25	400	5.71	400	5.71	400	6.5	400	6.5
	Relaxation	400	600				Total volume	6800	100	6400	100	7000	100	7000	100	6200	100	6200	100
							end research (E3)
	A2, A3	Initial	Final				effort zones	athlet 1		athlet 2		athlet 3		athlet 4		athlet 5		athlet 6
	Warm up	1200	1200				R1	50		60		50		50		45		45
	R1	1600	2000				R2	5		5		5		5		5		5
	R2	3000	2600				R3	10		5		5		5		5		5
	Picioare	800	1000				Sprint	10		10		10		10		20		20
	Relaxare	400	200				warm up - relaxation	20		20		20		20		20		20
							T.E.	5		5		10		10		5		5
								m	%	m	%	m	%	m	%	m	%	m	%
	A5, A6	Initial	Final				Warm up	800	12.5	800	11.11	1200	17.14	1200	17.14	400	6.1	400	6.1
	Warm up	1600	400				T.E.	800	12.5	800	11.11	-		-		400	6.1	400	6.1
	T.E.		400				S1	-		-		-		-		800	12.1	800	12.1
	S1	200	800				S2	1600	25	-		-		-		1600	24.2	1600	24.2
	S2	800	1600				R1	2000	31.25	-		2000	28.57	2000	28.57	1600	24.2	1600	24.2
	R1	3200	1600				R2	-		2000	27.78	2600	37.14	2600	37.14	-		-
	WL		1400				R3	-		2000	27.78	-		-				-
	Relaxation	400	400				WL	800	12.5	1000	13.89	1000	14.3	1000	14.3	1400	21.2	1400	21.2
							Relaxation	400	6.25	600	8.33	200	2.85	200	2.85	400	6.1	400	6.1
							Total volume (m)	6400	100	7200	100	7000	100	7000	100	6600	100	6600	100
		Notes. T.E. - technique exercises; WL - workouts for legs; R1 zone - basic endurance; R2 zones - threshold resistance; S1 - lactate tolerance; S2 zone - lactate production;
	Athlets	V.E.Z. (km)		T.V. (km)		Total volume (km)
		E1	E3	E1	E3	E1	E2	E3	E4
	A1	2	3.6	6.8	6.4	192	153	60	12
	A2	4.6	4.6	7	7	179	144	60	12
	A3	4.6	4.6	7	7	177	138	60	12
	A4	4	4	6.4	7.2	225	265	78	12
	A5	4.16	3.8	6.2	6.6	188	188	78	12
	A6	4.16	3.8	6.2	6.6	188	218	78	12
	V.E.Z. – volume of effort zones; T.V. – training volume
	Stage I (E1), General (T2)
	Stage III (E3), precompetitive (T3)

## Sheet: Sheet4
			Appendix Table 3		Results of blood glucose and lactate concentration in pre- and post-effort motor tests in different stages of training (n = 6)
	Stage, no weeks		Athlet (A)	mean times (sec)	Swim. speed (m·s-1)	Blood lactat (mmol·L¹ )			Boold glucose (mmol·L¹)
		Fitness Test	(swim. style)			pre-effort	post-effort 5 min	post-effort 15 min	pre-effort	post-effort 5 min	post-effort 15 min
			A1 (backstroke)	80.6	1.24	1.9	5.7	4.4	102	93	87
			A2 (butterfly)	74.38	1.344	1.9	6.8	6.7	103	124	104
	E1,	8x100 m	A3 (breaststroke)	85.6	1.168	2.2	12.2	8.2	111	151	120
	4 weeks		A4 (backstroke)	80.2	1.247	1.7	5.3	3.6	104	113	106
			A5 (front crawl stroke)	83.4	1.2	0.9	4	2.9	124	138	129
			A6 (front crawl stroke)	77.1	1.297	2.7	7.4	6.3	98	94	90
			A1 (backstroke)	79.5	1.258	1.5	9.7	6.4	98	92	89
	E2, 3 weeks	8x100 m	A2 (butterfly)	73.8	1.355	2.6	12.7	9.9	94	149	122
			A3 (breaststroke)	84	1.19	3	13.4	9.9	111	193	153
			A4 (backstroke)	78.53	1.273	1.3	10.3	7.8	100	138	112
	E2, 5 weeks	8x100 m	A5 (front crawl stroke)	81.7	1.224	1.2	7	5.2	132	159	146
			A6 (front crawl stroke)	76.3	1.31	1.9	11.1	8.7	95	104	82
			A1 (backstroke)	73.5	1.36	1.6	8.1	6.3	97	93	91
			A2 (butterfly)	63.8	1.567	2.1	9.8	7.5	97	128	101
	E3, 2 weeks	2x50 m	A3 (breaststroke)	81.1	1.233	2.4	11.6	8.1	108	127	116
			A4 (backstroke)	70.9	1.41	1.9	8.6	7.1	82	109	96
			A5 (front crawl stroke)	72.9	1.372	1.1	7.6	6.1	122	146	132
			A6 (front crawl stroke)	67.9	1.473	1.9	9.6	6.1	89	117	91
	E1	X1	X2	X3	X4	X5	X6	X7	X8
	Mean	80.2133	1.24933	1.88333	6.9	5.35	107	118.833	106
	S.E.M.	1.66374	0.026061	0.242785	1.16562	0.832967	3.81226	9.56876	6.69826
	S.D.	4.07532	0.0638362	0.594699	2.85517	2.04034	9.33809	23.4386	16.4073
	Variance	16.6083	0.00407507	0.353667	8.152	4.163	87.2	549.367	269.2
	Coef. Var.	0.0508061	0.0510963	0.315769	0.413793	0.381373	0.0872719	0.197239	0.154786
	Minimum	74.38	1.168	0.9	4	2.9	98	93	87
	Maximum	85.6	1.344	2.7	12.2	8.2	124	151	129
	Sum	481.28	7.496	11.3	41.4	32.1	642	713	636
	N	6	6	6	6	6	6	6	6
	Skewness	-0.129329	0.250779	-0.396413	1.11814	0.142999	1.08484	0.131158	0.195833
	Curtosis	-1.08849	-1.04651	-0.331025	0.136431	-1.38896	-0.118298	-1.38324	-1.29732
	Mu3	-6.65901	4.96274e-05	-0.0634259	19.798	0.924	672	1284.74	658
	Mu4	366.154	2.25278e-05	0.23183	144.744	19.3891	15216.7	338850	85688.3
	Mean Deviation	3.584	0.0569333	0.466667	2.32	2.06	8.4	22.6	14.8
	Median	80.4	1.2435	1.9	6.25	5.35	103.5	118.5	105
	Range	11.22	0.176	1.8	8.2	5.3	26	58	42
	Confidence Level of Mean(0.95)	4.27679	0.066992	0.624098	2.99632	2.14121	9.79973	24.5973	17.2184
	Lower Confidence Limit of Mean	75.9365	1.18234	1.25924	3.90368	3.20879	97.2003	94.2361	88.7816
	Upper Confidence Limit of Mean	84.4901	1.31633	2.50743	9.89632	7.49121	116.8	143.431	123.218
	Lower Quartile	77.875	1.21	1.75	5.4	3.8	102.25	98.75	93.5
	Upper Quartile	82.7	1.2845	2.125	7.25	6.6	109.25	134.5	116.5
	Quartile Range	4.825	0.0745	0.375	1.85	2.8	7	35.75	23
	Quartile Deviation	2.4125	0.03725	0.1875	0.925	1.4	3.5	17.875	11.5
	Quartile Variation	3.00483	2.98657	9.67742	14.6245	26.9231	3.30969	15.3269	10.9524
	Quartile Measure of Skewness	-0.0466321	0.100671	0.2	0.0810811	-0.107143	0.642857	-0.104895	0
	E2	X1	X2	X3	X4	X5	X6	X7	X8
	Mean	78.9717	1.26833	1.91667	10.7	7.98333	105	139.167	117.333
	S.E.M.	1.49539	0.0241366	0.300463	0.936305	0.777782	5.94418	15.1116	11.8256
	S.D.	3.66295	0.0591225	0.73598	2.29347	1.90517	14.5602	37.0158	28.9666
	Variance	13.4172	0.00349547	0.541667	5.26	3.62967	212	1370.17	839.067
	Coef. Var.	0.0463831	0.0466143	0.38399	0.214343	0.238643	0.138669	0.265982	0.246875
	Minimum	73.8	1.19	1.2	7	5.2	94	92	82
	Maximum	84	1.355	3	13.4	9.9	132	193	153
	Sum	473.83	7.61	11.5	64.2	47.9	630	835	704
	N	6	6	6	6	6	6	6	6
	Skewness	-0.0440632	0.163794	0.503161	-0.435321	-0.351282	1.2137	0.0705831	0.0182307
	Curtosis	-1.05208	-1.01692	-1.33625	-0.765374	-1.29569	-0.00745461	-1.07713	-1.46668
	Mu3	-1.64739	2.57504e-05	0.152593	-3.995	-1.84793	2850	2723.26	337.074
	Mu4	243.52	1.68263e-05	0.338991	42.9352	15.5926	93400.7	2.50689e+06	749656
	Mean Deviation	3.314	0.0532	0.706667	2.04	1.82	13.2	33.4	27.6
	Median	79.015	1.2655	1.7	10.7	8.25	99	143.5	117
	Range	10.2	0.165	1.8	6.4	4.7	38	101	71
	Confidence Level of Mean(0.95)	3.84403	0.0620452	0.772364	2.40685	1.99935	15.28	38.8457	30.3986
	Lower Confidence Limit of Mean	75.1276	1.20629	1.1443	8.29315	5.98398	89.72	100.321	86.9347
	Upper Confidence Limit of Mean	82.8157	1.33038	2.68903	13.1068	9.98268	120.28	178.012	147.732
	Lower Quartile	76.8575	1.2325	1.35	9.85	6.75	95.75	112.5	94.75
	Upper Quartile	81.15	1.30075	2.425	12.3	9.6	108.25	156.5	140
	Quartile Range	4.2925	0.06825	1.075	2.45	2.85	12.5	44	45.25
	Quartile Deviation	2.14625	0.034125	0.5375	1.225	1.425	6.25	22	22.625
	Quartile Variation	2.71664	2.69417	28.4768	11.0609	17.4312	6.12745	16.3569	19.2758
	Quartile Measure of Skewness	-0.0052417	0.032967	0.348837	0.306122	-0.0526316	0.48	-0.409091	0.0165746
	E3	X1	X2	X3	X4	X5	X6	X7	X8
	Mean	71.6833	1.4025	1.83333	9.21667	6.86667	99.1667	120	104.5
	S.E.M.	2.38417	0.0460266	0.181965	0.58902	0.340261	5.7932	7.4117	6.67708
	S.D.	5.84001	0.112742	0.44572	1.4428	0.833467	14.1904	18.1549	16.3554
	Variance	34.1057	0.0127107	0.198667	2.08167	0.694667	201.367	329.6	267.5
	Coef. Var.	0.0814695	0.0803863	0.24312	0.156542	0.121379	0.143096	0.151291	0.156511
	Minimum	63.8	1.233	1.1	7.6	6.1	82	93	91
	Maximum	81.1	1.567	2.4	11.6	8.1	122	146	132
	Sum	430.1	8.415	11	55.3	41.2	595	720	627
	N	6	6	6	6	6	6	6	6
	Skewness	0.328063	-0.0264003	-0.508584	0.579235	0.40094	0.495577	-0.0955609	0.838282
	Curtosis	-0.535703	-0.643228	-0.56538	-0.732922	-1.37283	-0.777608	-0.769503	-0.782317
	Mu3	49.7079	-2.878e-05	-0.0342593	1.32343	0.176593	1077.26	-435	2790
	Mu4	1990.6	0.00026442	0.0667296	6.82223	0.545285	62579.7	168273	110201
	Mean Deviation	4.98	0.097	0.386667	1.34	0.84	12.6667	16.4	15.6
	Median	71.9	1.391	1.9	9.1	6.7	97	122	98.5
	Range	17.3	0.334	1.3	4	2	40	53	41
	Confidence Level of Mean(0.95)	6.12871	0.118315	0.467755	1.51412	0.87467	14.8919	19.0524	17.164
	Lower Confidence Limit of Mean	65.5546	1.28418	1.36558	7.70254	5.992	84.2748	100.948	87.336
	Upper Confidence Limit of Mean	77.812	1.52082	2.30109	10.7308	7.74134	114.059	139.052	121.664
	Lower Quartile	68.65	1.363	1.675	8.225	6.15	91	111	92.25
	Upper Quartile	73.35	1.45725	2.05	9.75	7.4	105.25	127.75	112.25
	Quartile Range	4.7	0.09425	0.375	1.525	1.25	14.25	16.75	20
	Quartile Deviation	2.35	0.047125	0.1875	0.7625	0.625	7.125	8.375	10
	Quartile Variation	3.30986	3.3419	10.0671	8.48401	9.22509	7.26115	7.01571	9.77995
	Quartile Measure of Skewness	-0.382979	0.405836	-0.2	-0.147541	0.12	0.157895	-0.313433	0.375

## Sheet: Sheet5
		Appendix table 4	Results of the modification of the metabolic and hormonal parameters in the 100 m specialized event in pre - and post-effort (n = 6)
	Stages	Athletes (swim. style)	metabolic parameters		hormonal parameters
			Lymphocytes (%)	Blood glucose (mg/dl)	Norepinephrine (nmol/l)	Prolactin (ng/ml)	Cortizol (μg/dl)
	Bazal	A1 (backstroke)	46.3	83	1.6	6.69	15.8
		A2 (butterfly)	40.7	87	3.8	7.25	14.7
		A3 (breaststroke)	41	91	3.07	4.92	12.9
		A4 (backstroke)	49.2	85	3.01	6.53	12
		A5 front crawl stroke)	56.7*	84	4.16*	7.87	9.49
		A6 (front crawl stroke)	33.8	109.0*	1.06	9.15	10.6
	Pre-effort	A1 (backstroke)	43.6	67.33	1.02	10.6	11.8
		A2 (butterfly)	43.8	103.73	0.5	11.2	13.4
		A3 (breaststroke)	39.3	102.73*	2.66	7.2	11.8
		A4 (backstroke)	45.8	82	1.06	5.31	8.96
		A5 front crawl stroke)	62.0*	97	0.94	7.26	7.52
		A6 (front crawl stroke)	40.8	106*	1.51	16.5	13.2
	Post-efort	A1 (backstroke)	52.0*	115.9*	3.4	13	14.6
		A2 (butterfly)	53.4*	129.82*	8.68*	16	16.5*
		A3 (breaststroke)	40	129.63*	3.53	9.92	13.3
		A4 (backstroke)	47.1	111.0*	10.94*	7.06	13.9
		A5 front crawl stroke)	56.3*	112.0*	15.80*	33.1*	22.5*
		A6 (front crawl stroke)	53.9*	131.0*	3.87	13.3	13.4
	Basal
		X1	X2	X3	X4	X5
	Mean	44.6167	89.8333	2.78333	7.06833	12.5817
	S.E.M.	3.24175	4.00347	0.497746	0.579002	0.979287
	S.D.	7.94063	9.80646	1.21922	1.41826	2.39875
	Variance	63.0537	96.1667	1.48651	2.01146	5.75402
	Coef. Var.	0.177975	0.109163	0.438044	0.20065	0.190655
	Minimum	33.8	83	1.06	4.92	9.49
	Maximum	56.7	109	4.16	9.15	15.8
	Sum	267.7	539	16.7	42.41	75.49
	N	6	6	6	6	6
	Skewness	0.215446	1.48439	-0.37232	-0.044826	0.0847971
	Curtosis	-0.835114	0.604777	-1.32189	-0.591806	-1.3014
	Mu3	82.0599	1064.91	-0.513328	-0.0972801	0.89036
	Mu4	5977.14	23150.7	2.57509	6.76629	39.0544
	Mean Deviation	7.34	8.13333	1.16267	1.226	2.262
	Median	43.65	86	3.04	6.97	12.45
	Range	22.9	26	3.1	4.23	6.31
	Confidence Level of Mean(0.95)	8.33318	10.2912	1.2795	1.48837	2.51734
	Lower Confidence Limit of Mean	36.2835	79.5421	1.50384	5.57996	10.0643
	Upper Confidence Limit of Mean	52.9499	100.125	4.06283	8.5567	15.099
	Lower Quartile	40.775	84.25	1.9525	6.57	10.95
	Upper Quartile	48.475	90	3.6175	7.715	14.25
	Quartile Range	7.7	5.75	1.665	1.145	3.3
	Quartile Deviation	3.85	2.875	0.8325	0.5725	1.65
	Quartile Variation	8.62745	3.29986	29.8923	8.0154	13.0952
	Quartile Measure of Skewness	0.253247	0.391304	-0.306306	0.30131	0.0909091
	pre-effort	X1	X2	X3	X4	X5
	Mean	45.8833	93.1317	1.28167	9.67833	11.1133
	S.E.M.	3.35901	6.2574	0.305357	1.64086	0.967384
	S.D.	8.22786	15.3274	0.747968	4.01928	2.3696
	Variance	67.6977	234.93	0.559457	16.1546	5.61499
	Coef. Var.	0.179321	0.164578	0.58359	0.415286	0.213221
	Minimum	39.3	67.33	0.5	5.31	7.52
	Maximum	62	106	2.66	16.5	13.4
	Sum	275.3	558.79	7.69	58.07	66.68
	N	6	6	6	6	6
	Skewness	1.47446	-0.869613	1.0912	0.705319	-0.571252
	Curtosis	0.668915	-0.794055	0.0717917	-0.601873	-1.21138
	Mu3	624.772	-2382.11	0.347362	34.8383	-5.78201
	Mu4	11676.8	84549.2	0.66767	434.611	39.1609
	Mean Deviation	6.44667	14.7733	0.642667	3.706	2.29867
	Median	43.7	99.865	1.04	8.93	11.8
	Range	22.7	38.67	2.16	11.19	5.88
	Confidence Level of Mean(0.95)	8.63461	16.0852	0.784945	4.21797	2.48674
	Lower Confidence Limit of Mean	37.2487	77.0465	0.496722	5.46036	8.62659
	Upper Confidence Limit of Mean	54.5179	109.217	2.06661	13.8963	13.6001
	Lower Quartile	41.5	85.75	0.96	7.215	9.67
	Upper Quartile	45.3	103.48	1.3975	11.05	12.85
	Quartile Range	3.8	17.73	0.4375	3.835	3.18
	Quartile Deviation	1.9	8.865	0.21875	1.9175	1.59
	Quartile Variation	4.37788	9.36955	18.5578	20.9964	14.1208
	Quartile Measure of Skewness	-0.157895	-0.592217	0.634286	0.105606	-0.339623
	post-effort	X1	X2	X3	X4	X5
	Mean	50.45	121.558	7.70333	15.3967	15.7
	S.E.M.	2.43348	3.90474	2.06249	3.7568	1.44199
	S.D.	5.96079	9.56461	5.05204	9.20224	3.53214
	Variance	35.531	91.4818	25.5231	84.6812	12.476
	Coef. Var.	0.118152	0.0786833	0.655826	0.597677	0.224977
	Minimum	40	111	3.4	7.06	13.3
	Maximum	56.3	131	15.8	33.1	22.5
	Sum	302.7	729.35	46.22	92.38	94.2
	N	6	6	6	6	6
	Skewness	-0.939384	-0.0751149	0.606439	1.34445	1.40098
	Curtosis	-0.443929	-1.89162	-1.05826	0.480964	0.410209
	Mu3	-151.35	-49.9984	59.4863	796.99	46.965
	Mu4	2240.91	6441.64	878.41	17334.5	368.612
	Mean Deviation	5.52	10.31	4.924	7.32267	3.04
	Median	52.7	122.765	6.275	13.15	14.25
	Range	16.3	20	12.4	26.04	9.2
	Confidence Level of Mean(0.95)	6.25546	10.0374	5.30179	9.65716	3.70675
	Lower Confidence Limit of Mean	44.1945	111.521	2.40154	5.73951	11.9932
	Upper Confidence Limit of Mean	56.7055	131.596	13.0051	25.0538	19.4068
	Lower Quartile	48.325	112.975	3.615	10.69	13.525
	Upper Quartile	53.775	129.773	10.375	15.325	16.025
	Quartile Range	5.45	16.7975	6.76	4.635	2.5
	Quartile Deviation	2.725	8.39875	3.38	2.3175	1.25
	Quartile Variation	5.3379	6.91974	48.3202	17.8166	8.46024
	Quartile Measure of Skewness	-0.605505	-0.16565	0.213018	-0.0614887	0.42

## Sheet: Sheet6
		Table 5	Correlation coefficient for the relationship between lactate and blood glucose at each testing moment in training and the average time at MT 8x100 m and 2x50 m, volume of effort zones, training volume, CWT și CPST (n=6)
E1					E1										E2							E3					E3
La - pre-eff (E1)	MT1-E1				La pre-eff (E1)	VEZ1									La pre-eff	MT1-E2						La pre-eff	MT2-E3				La pre-eff	VZE2
1.9	80.6				1.9	2									1.5	79.5						1.6	73.5				1.6	3.6
1.9	74.38				1.9	4.6									2.6	73.8						2.1	63.8				2.1	4.6
2.2	85.6				2.2	4.6									3	84						2.4	81.1				2.4	4.6
1.7	80.2				1.7	4									1.3	78.53						1.9	70.9				1.9	4
0.9	83.4				0.9	4.16									1.2	81.7						1.1	72.9				1.1	3.8
2.7	77.1				2.7	4.16									1.9	76.3						1.9	67.9				1.9	3.8
Nonparametric Correlation					Nonparametric Correlation										Nonparametric Correlation							Nonparametric Correlation					Nonparametric Correlation
Spearman Rank Correlation					Spearman Rank Correlation										Spearman Rank Correlation							Spearman Rank Correlation					Spearman Rank Correlation
Statistic	70.5				Statistic	78.75									Statistic	72						Statistic	72.5				Statistic	87.75
Mean	73.5				Mean	73.5									Mean	73.5						Mean	73.5				Mean	73.5
Variance	59.5				Variance	56.1									Variance	61.25						Variance	59.5				Variance	56.1
Rho (corrected for ties)	-0.173931				Rho (corrected for ties)	0.313468									Rho (corrected for ties)	-0.0857143						Rho (corrected for ties)	-0.0579771				Rho (corrected for ties)	0.850841
Exact Method					Exact Method										Exact Method							Exact Method					Exact Method
Upper Probability	0.9986				Upper Probability	0.9986									Upper Probability	0.9986						Upper Probability	0.9986				Upper Probability	0.9986
Lower Probability	0.001389				Lower Probability	0.001389									Lower Probability	0.001389						Lower Probability	0.001389				Lower Probability	0.001389
Two-sided Probability	0.002778	** (P<=0.01) (two-sided)			Two-sided Probability	0.002778	** (P<=0.01) (two-sided)								Two-sided Probability	0.002778	** (P<=0.01) (two-sided)					Two-sided Probability	0.002778	** (P<=0.01) (two-sided)			Two-sided Probability	0.002778	** (P<=0.01) (two-sided)
Kendall Rank Correlation					Kendall Rank Correlation										Kendall Rank Correlation							Kendall Rank Correlation					Kendall Rank Correlation
Statistic	-2				Statistic	2									Statistic	-3						Statistic	-2				Statistic	10
Mean	0				Mean	0									Mean	0						Mean	0				Mean	0
Variance	27.3333				Variance	25.4667									Variance	28.3333						Variance	27.3333				Variance	25.4667
Tau (corrected for ties)	-0.138013				Tau (corrected for ties)	0.14825									Tau (corrected for ties)	-0.2						Tau (corrected for ties)	-0.138013				Tau (corrected for ties)	0.741249
Normal Approximation Method					Normal Approximation Method										Normal Approximation Method							Normal Approximation Method					Normal Approximation Method
Caution: the probabilities given are approximates for large N.					Caution: the probabilities given are approximates for large N.										Caution: the probabilities given are approximates for large N.							Caution: the probabilities given are approximates for large N.					Caution: the probabilities given are approximates for large N.
Z	-0.382546				Z	0.396318									Z	-0.563602						Z	-0.382546				Z	1.98159
With Continuity Correction (for ABS(Z)<=2)					With Continuity Correction (for ABS(Z)<=2)										With Continuity Correction (for ABS(Z)<=2)							With Continuity Correction (for ABS(Z)<=2)					With Continuity Correction (for ABS(Z)<=2)
Upper Probability	0.6837				Upper Probability	0.3831									Upper Probability	0.7446						Upper Probability	0.6837				Upper Probability	0.02988
Lower Probability	0.3871				Lower Probability	0.6898									Lower Probability	0.3193						Lower Probability	0.3871				Lower Probability	0.9813
Two-sided Probability	0.7742	Not Significant (P>0.05) (two-sided)			Two-sided Probability	0.7663	Not Significant (P>0.05) (two-sided)								Two-sided Probability	0.6386	Not Significant (P>0.05) (two-sided)					Two-sided Probability	0.7742	Not Significant (P>0.05) (two-sided)			Two-sided Probability	0.05977	Not Significant (P>0.05) (two-sided)
Without Continuity Correction (for ABS(Z)>2)					Without Continuity Correction (for ABS(Z)>2)										Without Continuity Correction (for ABS(Z)>2)							Without Continuity Correction (for ABS(Z)>2)					Without Continuity Correction (for ABS(Z)>2)
Upper Probability	0.649				Upper Probability	0.3459									Upper Probability	0.7135						Upper Probability	0.649				Upper Probability	0.02376
Lower Probability	0.351				Lower Probability	0.6541									Lower Probability	0.2865						Lower Probability	0.351				Lower Probability	0.9762
Two-sided Probability	0.7021	Not Significant (P>0.05) (two-sided)			Two-sided Probability	0.6919	Not Significant (P>0.05) (two-sided)								Two-sided Probability	0.573	Not Significant (P>0.05) (two-sided)					Two-sided Probability	0.7021	Not Significant (P>0.05) (two-sided)			Two-sided Probability	0.04753	* (P<=0.05) (two-sided)
Exact Method(Not corrected for ties)					Exact Method(Not corrected for ties)										Exact Method(Not corrected for ties)							Exact Method(Not corrected for ties)					Exact Method(Not corrected for ties)
Upper Probability	0.5				Upper Probability	0.5									Upper Probability	0.3597						Upper Probability	0.5				Upper Probability	0.02778
Lower Probability	0.5				Lower Probability	0.5									Lower Probability	0.6403						Lower Probability	0.5				Lower Probability	0.9722
Two-sided Probability	1	Not Significant (P>0.05) (two-sided)			Two-sided Probability	1	Not Significant (P>0.05) (two-sided)								Two-sided Probability	0.7194	Not Significant (P>0.05) (two-sided)					Two-sided Probability	1	Not Significant (P>0.05) (two-sided)			Two-sided Probability	0.05556	Not Significant (P>0.05) (two-sided)
E1+
La 5 min post-ef	MT1-E1				La 5 min post-ef	VZE1											La 5 min post-ef	FT1-E2				La 5 min post-ef	FT2-E3			La 5 min post-ef	VZE3
5.7	80.6				5.7	2											9.7	79.5				8.1	73.5			8.1	3.6
6.8	74.38				6.8	4.6											12.7	73.8				9.8	63.8			9.8	4.6
12.2	85.6				12.2	4.6											13.4	84				11.6	81.1			11.6	4.6
5.3	80.2				5.3	4											10.3	78.53				8.6	70.9			8.6	4
4	83.4				4	4.16											7	81.7				7.6	72.9			7.6	3.8
7.4	77.1				7.4	4.16											11.1	76.3				9.6	67.9			9.6	3.8
Nonparametric Correlation					Nonparametric Correlation												Nonparametric Correlation					Nonparametric Correlation				Nonparametric Correlation
Spearman Rank Correlation					Spearman Rank Correlation												Spearman Rank Correlation					Spearman Rank Correlation				Spearman Rank Correlation
Statistic	73				Statistic	83											Statistic	71				Statistic	72			Statistic	87
Mean	73.5				Mean	73.5											Mean	73.5				Mean	73.5			Mean	73.5
Variance	61.25				Variance	57.75											Variance	61.25				Variance	61.25			Variance	57.75
Rho (corrected for ties)	-0.0285714				Rho (corrected for ties)	0.559065											Rho (corrected for ties)	-0.142857				Rho (corrected for ties)	-0.0857143			Rho (corrected for ties)	0.794461
Exact Method					Exact Method												Exact Method					Exact Method				Exact Method
Upper Probability	0.9986				Upper Probability	0.9986											Upper Probability	0.9986				Upper Probability	0.9986			Upper Probability	0.9986
Lower Probability	0.001389				Lower Probability	0.001389											Lower Probability	0.001389				Lower Probability	0.001389			Lower Probability	0.001389
Two-sided Probability	0.002778	** (P<=0.01) (two-sided)			Two-sided Probability	0.002778	** (P<=0.01) (two-sided)										Two-sided Probability	0.002778	** (P<=0.01) (two-sided)			Two-sided Probability	0.002778	** (P<=0.01) (two-sided)		Two-sided Probability	0.002778	** (P<=0.01) (two-sided)
Kendall Rank Correlation					Kendall Rank Correlation							Kendall Rank Correlation					Kendall Rank Correlation					Kendall Rank Correlation				Kendall Rank Correlation
Statistic	-1				Statistic	5						Statistic	5				Statistic	-5				Statistic	-3			Statistic	9
Mean	0				Mean	0						Mean	0				Mean	0				Mean	0			Mean	0
Variance	28.3333				Variance	26.3333						Variance	26.3333				Variance	28.3333				Variance	28.3333			Variance	26.3333
Tau (corrected for ties)	-0.0666667				Tau (corrected for ties)	0.358057						Tau (corrected for ties)	0.358057				Tau (corrected for ties)	-0.333333				Tau (corrected for ties)	-0.2			Tau (corrected for ties)	0.644503
Normal Approximation Method					Normal Approximation Method							Normal Approximation Method					Normal Approximation Method					Normal Approximation Method				Normal Approximation Method
Caution: the probabilities given are approximates for large N.					Caution: the probabilities given are approximates for large N.							Caution: the probabilities given are approximates for large N.					Caution: the probabilities given are approximates for large N.					Caution: the probabilities given are approximates for large N.				Caution: the probabilities given are approximates for large N.
Z	-0.187867				Z	0.974355						Z	0.974355				Z	-0.939336				Z	-0.563602			Z	1.75384
With Continuity Correction (for ABS(Z)<=2)					With Continuity Correction (for ABS(Z)<=2)							With Continuity Correction (for ABS(Z)<=2)					With Continuity Correction (for ABS(Z)<=2)					With Continuity Correction (for ABS(Z)<=2)				With Continuity Correction (for ABS(Z)<=2)
Upper Probability	0.611				Upper Probability	0.1903						Upper Probability	0.1903				Upper Probability	0.8493				Upper Probability	0.7446			Upper Probability	0.04882
Lower Probability	0.4626				Lower Probability	0.8581						Lower Probability	0.8581				Lower Probability	0.1989				Lower Probability	0.3193			Lower Probability	0.9679
Two-sided Probability	0.9252	Not Significant (P>0.05) (two-sided)			Two-sided Probability	0.3805	Not Significant (P>0.05) (two-sided)					Two-sided Probability	0.3805	Not Significant (P>0.05) (two-sided)			Two-sided Probability	0.3979	Not Significant (P>0.05) (two-sided)			Two-sided Probability	0.6386	Not Significant (P>0.05) (two-sided)		Two-sided Probability	0.09764	Not Significant (P>0.05) (two-sided)
Without Continuity Correction (for ABS(Z)>2)					Without Continuity Correction (for ABS(Z)>2)							Without Continuity Correction (for ABS(Z)>2)					Without Continuity Correction (for ABS(Z)>2)					Without Continuity Correction (for ABS(Z)>2)				Without Continuity Correction (for ABS(Z)>2)
Upper Probability	0.5745				Upper Probability	0.1649						Upper Probability	0.1649				Upper Probability	0.8262				Upper Probability	0.7135			Upper Probability	0.03973
Lower Probability	0.4255				Lower Probability	0.8351						Lower Probability	0.8351				Lower Probability	0.1738				Lower Probability	0.2865			Lower Probability	0.9603
Two-sided Probability	0.851	Not Significant (P>0.05) (two-sided)			Two-sided Probability	0.3299	Not Significant (P>0.05) (two-sided)					Two-sided Probability	0.3299	Not Significant (P>0.05) (two-sided)			Two-sided Probability	0.3476	Not Significant (P>0.05) (two-sided)			Two-sided Probability	0.573	Not Significant (P>0.05) (two-sided)		Two-sided Probability	0.07946	Not Significant (P>0.05) (two-sided)
Exact Method(Not corrected for ties)					Exact Method(Not corrected for ties)							Exact Method(Not corrected for ties)					Exact Method(Not corrected for ties)					Exact Method(Not corrected for ties)				Exact Method(Not corrected for ties)
Upper Probability	0.5				Upper Probability	0.2347						Upper Probability	0.2347				Upper Probability	0.2347				Upper Probability	0.3597			Upper Probability	0.06806
Lower Probability	0.5				Lower Probability	0.7653						Lower Probability	0.7653				Lower Probability	0.7653				Lower Probability	0.6403			Lower Probability	0.9319
Two-sided Probability	1	Not Significant (P>0.05) (two-sided)			Two-sided Probability	0.4694	Not Significant (P>0.05) (two-sided)					Two-sided Probability	0.4694	Not Significant (P>0.05) (two-sided)			Two-sided Probability	0.4694	Not Significant (P>0.05) (two-sided)			Two-sided Probability	0.7194	Not Significant (P>0.05) (two-sided)		Two-sided Probability	0.1361	Not Significant (P>0.05) (two-sided)
E1+
La 15 min post-ef	FT1-E1				La 15 min post-ef	VZE1				La 15 min post-ef	MT1-E2				La 15 min post-ef	FT2-E3						La 15 min post-ef	VZE2
4.4	80.6				4.4	2				6.4	79.5				6.3	73.5						6.3	3.6
6.7	74.38				6.7	4.6				9.9	73.8				7.5	63.8						7.5	4.6
8.2	85.6				8.2	4.6				9.9	84				8.1	81.1						8.1	4.6
3.6	80.2				3.6	4				7.8	78.53				7.1	70.9						7.1	4
2.9	83.4				2.9	4.16				5.2	81.7				6.1	72.9						6.1	3.8
6.3	77.1				6.3	4.16				8.7	76.3				6.1	67.9						6.1	3.8
Nonparametric Correlation					Nonparametric Correlation					Nonparametric Correlation					Nonparametric Correlation							Nonparametric Correlation
Spearman Rank Correlation					Spearman Rank Correlation					Spearman Rank Correlation					Spearman Rank Correlation							Spearman Rank Correlation
Statistic	72				Statistic	85				Statistic	68.5				Statistic	77						Statistic	87
Mean	73.5				Mean	73.5				Mean	73.5				Mean	73.5						Mean	73.5
Variance	61.25				Variance	57.75				Variance	59.5				Variance	59.5						Variance	56.1
Rho (corrected for ties)	-0.0857143				Rho (corrected for ties)	0.676763				Rho (corrected for ties)	-0.289886				Rho (corrected for ties)	0.20292						Rho (corrected for ties)	0.80606
Exact Method					Exact Method					Exact Method					Exact Method							Exact Method
Upper Probability	0.9986				Upper Probability	0.9986				Upper Probability	0.9986				Upper Probability	0.9986						Upper Probability	0.9986
Lower Probability	0.001389				Lower Probability	0.001389				Lower Probability	0.001389				Lower Probability	0.001389						Lower Probability	0.001389
Two-sided Probability	0.002778	** (P<=0.01) (two-sided)			Two-sided Probability	0.002778	** (P<=0.01) (two-sided)			Two-sided Probability	0.002778	** (P<=0.01) (two-sided)			Two-sided Probability	0.002778	** (P<=0.01) (two-sided)					Two-sided Probability	0.002778	** (P<=0.01) (two-sided)
Kendall Rank Correlation					Kendall Rank Correlation					Kendall Rank Correlation					Kendall Rank Correlation							Kendall Rank Correlation
Statistic	-3				Statistic	7				Statistic	-6				Statistic	2						Statistic	9
Mean	0				Mean	0				Mean	0				Mean	0						Mean	0
Variance	28.3333				Variance	26.3333				Variance	27.3333				Variance	27.3333						Variance	25.4667
Tau (corrected for ties)	-0.2				Tau (corrected for ties)	0.50128				Tau (corrected for ties)	-0.414039				Tau (corrected for ties)	0.138013						Tau (corrected for ties)	0.667124
Normal Approximation Method					Normal Approximation Method					Normal Approximation Method					Normal Approximation Method							Normal Approximation Method
Caution: the probabilities given are approximates for large N.					Caution: the probabilities given are approximates for large N.					Caution: the probabilities given are approximates for large N.					Caution: the probabilities given are approximates for large N.							Caution: the probabilities given are approximates for large N.
Z	-0.563602				Z	1.3641				Z	-1.14764				Z	0.382546						Z	1.78343
With Continuity Correction (for ABS(Z)<=2)					With Continuity Correction (for ABS(Z)<=2)					With Continuity Correction (for ABS(Z)<=2)					With Continuity Correction (for ABS(Z)<=2)							With Continuity Correction (for ABS(Z)<=2)
Upper Probability	0.7446				Upper Probability	0.1026				Upper Probability	0.8931				Upper Probability	0.3871						Upper Probability	0.04606
Lower Probability	0.3193				Lower Probability	0.9281				Lower Probability	0.1464				Lower Probability	0.6837						Lower Probability	0.9701
Two-sided Probability	0.6386	Not Significant (P>0.05) (two-sided)			Two-sided Probability	0.2053	Not Significant (P>0.05) (two-sided)			Two-sided Probability	0.2928	Not Significant (P>0.05) (two-sided)			Two-sided Probability	0.7742	Not Significant (P>0.05) (two-sided)					Two-sided Probability	0.09211	Not Significant (P>0.05) (two-sided)
Without Continuity Correction (for ABS(Z)>2)					Without Continuity Correction (for ABS(Z)>2)					Without Continuity Correction (for ABS(Z)>2)					Without Continuity Correction (for ABS(Z)>2)							Without Continuity Correction (for ABS(Z)>2)
Upper Probability	0.7135				Upper Probability	0.08627				Upper Probability	0.8744				Upper Probability	0.351						Upper Probability	0.03726
Lower Probability	0.2865				Lower Probability	0.9137				Lower Probability	0.1256				Lower Probability	0.649						Lower Probability	0.9627
Two-sided Probability	0.573	Not Significant (P>0.05) (two-sided)			Two-sided Probability	0.1725	Not Significant (P>0.05) (two-sided)			Two-sided Probability	0.2511	Not Significant (P>0.05) (two-sided)			Two-sided Probability	0.7021	Not Significant (P>0.05) (two-sided)					Two-sided Probability	0.07452	Not Significant (P>0.05) (two-sided)
Exact Method(Not corrected for ties)					Exact Method(Not corrected for ties)					Exact Method(Not corrected for ties)					Exact Method(Not corrected for ties)							Exact Method(Not corrected for ties)
Upper Probability	0.3597				Upper Probability	0.1361				Upper Probability	0.2347				Upper Probability	0.5						Upper Probability	0.06806
Lower Probability	0.6403				Lower Probability	0.8639				Lower Probability	0.7653				Lower Probability	0.5						Lower Probability	0.9319
Two-sided Probability	0.7194	Not Significant (P>0.05) (two-sided)			Two-sided Probability	0.2722	Not Significant (P>0.05) (two-sided)			Two-sided Probability	0.4694	Not Significant (P>0.05) (two-sided)			Two-sided Probability	1	Not Significant (P>0.05) (two-sided)					Two-sided Probability	0.1361	Not Significant (P>0.05) (two-sided)
E1
Glu Pre-eff	MT1-E1				GluPre-eff	VZE1				GluPre-eff	FT1-E2				Glu Pre-eff	FT2-E3									GluPre-eff	VZ E3
102	80.6				102	2				98	79.5				97	73.5									97	3.6
103	74.38				103	4.6				94	73.8				97	63.8									97	4.6
111	85.6				111	4.6				111	84				108	81.1									108	4.6
104	80.2				104	4				100	78.53				82	70.9									82	4
124	83.4				124	4.16				132	81.7				122	72.9									122	3.8
98	77.1				98	4.16				95	76.3				89	67.9									89	3.8
Nonparametric Correlation					Nonparametric Correlation					Nonparametric Correlation					Nonparametric Correlation										Nonparametric Correlation
Spearman Rank Correlation					Spearman Rank Correlation					Spearman Rank Correlation					Spearman Rank Correlation										Spearman Rank Correlation
Statistic	85				Statistic	78.5				Statistic	89				Statistic	82									Statistic	74.25
Mean	73.5				Mean	73.5				Mean	73.5				Mean	73.5									Mean	73.5
Variance	61.25				Variance	57.75				Variance	61.25				Variance	59.5									Variance	56.1
Rho (corrected for ties)	0.657143				Rho (corrected for ties)	0.294245				Rho (corrected for ties)	0.885714				Rho (corrected for ties)	0.492805									Rho (corrected for ties)	0.0447811
Exact Method					Exact Method					Exact Method					Exact Method										Exact Method
Upper Probability	0.9986				Upper Probability	0.9986				Upper Probability	0.9986				Upper Probability	0.9986									Upper Probability	0.9986
Lower Probability	0.001389				Lower Probability	0.001389				Lower Probability	0.001389				Lower Probability	0.001389									Lower Probability	0.001389
Two-sided Probability	0.002778	** (P<=0.01) (two-sided)			Two-sided Probability	0.002778	** (P<=0.01) (two-sided)			Two-sided Probability	0.002778	** (P<=0.01) (two-sided)			Two-sided Probability	0.002778	** (P<=0.01) (two-sided)								Two-sided Probability	0.002778	** (P<=0.01) (two-sided)
Kendall Rank Correlation					Kendall Rank Correlation					Kendall Rank Correlation					Kendall Rank Correlation										Kendall Rank Correlation
Statistic	7				Statistic	3				Statistic	11				Statistic	4									Statistic	0
Mean	0				Mean	0				Mean	0				Mean	0									Mean	0
Variance	28.3333				Variance	26.3333				Variance	28.3333				Variance	27.3333									Variance	25.4667
Tau (corrected for ties)	0.466667				Tau (corrected for ties)	0.214834				Tau (corrected for ties)	0.733333				Tau (corrected for ties)	0.276026									Tau (corrected for ties)	0
Normal Approximation Method					Normal Approximation Method					Normal Approximation Method					Normal Approximation Method										Normal Approximation Method
Caution: the probabilities given are approximates for large N.					Caution: the probabilities given are approximates for large N.					Caution: the probabilities given are approximates for large N.					Caution: the probabilities given are approximates for large N.										Caution: the probabilities given are approximates for large N.
Z	1.31507				Z	0.584613				Z	2.06654				Z	0.765092									Z	0
With Continuity Correction (for ABS(Z)<=2)					With Continuity Correction (for ABS(Z)<=2)					With Continuity Correction (for ABS(Z)<=2)					With Continuity Correction (for ABS(Z)<=2)										With Continuity Correction (for ABS(Z)<=2)
Upper Probability	0.111				Upper Probability	0.3131				Upper Probability	0.02427				Upper Probability	0.2516									Upper Probability	0.5395
Lower Probability	0.9206				Lower Probability	0.7524				Lower Probability	0.9846				Lower Probability	0.8053									Lower Probability	0.5395
Two-sided Probability	0.222	Not Significant (P>0.05) (two-sided)			Two-sided Probability	0.6261	Not Significant (P>0.05) (two-sided)			Two-sided Probability	0.04854	* (P<=0.05) (two-sided)			Two-sided Probability	0.5032	Not Significant (P>0.05) (two-sided)								Two-sided Probability	1	Not Significant (P>0.05) (two-sided)
Without Continuity Correction (for ABS(Z)>2)					Without Continuity Correction (for ABS(Z)>2)					Without Continuity Correction (for ABS(Z)>2)					Without Continuity Correction (for ABS(Z)>2)										Without Continuity Correction (for ABS(Z)>2)
Upper Probability	0.09424				Upper Probability	0.2794				Upper Probability	0.01939				Upper Probability	0.2221									Upper Probability	0.5
Lower Probability	0.9058				Lower Probability	0.7206				Lower Probability	0.9806				Lower Probability	0.7779									Lower Probability	0.5
Two-sided Probability	0.1885	Not Significant (P>0.05) (two-sided)			Two-sided Probability	0.5588	Not Significant (P>0.05) (two-sided)			Two-sided Probability	0.03878	* (P<=0.05) (two-sided)			Two-sided Probability	0.4442	Not Significant (P>0.05) (two-sided)								Two-sided Probability	1	Not Significant (P>0.05) (two-sided)
Exact Method(Not corrected for ties)					Exact Method(Not corrected for ties)					Exact Method(Not corrected for ties)					Exact Method(Not corrected for ties)										Exact Method(Not corrected for ties)
Upper Probability	0.1361				Upper Probability	0.3597				Upper Probability	0.02778				Upper Probability	0.3597									Upper Probability	0.6403
Lower Probability	0.8639				Lower Probability	0.6403				Lower Probability	0.9722				Lower Probability	0.6403									Lower Probability	0.3597
Two-sided Probability	0.2722	Not Significant (P>0.05) (two-sided)			Two-sided Probability	0.7194	Not Significant (P>0.05) (two-sided)			Two-sided Probability	0.05556	Not Significant (P>0.05) (two-sided)			Two-sided Probability	0.7194	Not Significant (P>0.05) (two-sided)								Two-sided Probability	0.7194	Not Significant (P>0.05) (two-sided)
E1
Glu 5min Post-ef	MT1-E1				Glu 5min Post-ef	VZ E1				Glu 5min Post-ef	FT1-E2				Glu 5min Post-ef	FT2-E3									Glu 5min Post-ef	VZ E3
93	80.6				93	2				92	79.5				93	73.5									93	3.6
124	74.38				124	4.6				149	73.8				128	63.8									128	4.6
151	85.6				151	4.6				193	84				127	81.1									127	4.6
113	80.2				113	4				138	78.53				109	70.9									109	4
138	83.4				138	4.16				159	81.7				146	72.9									146	3.8
94	77.1				94	4.16				104	76.3				117	67.9									117	3.8
Nonparametric Correlation					Nonparametric Correlation					Nonparametric Correlation					Nonparametric Correlation										Nonparametric Correlation
Spearman Rank Correlation					Spearman Rank Correlation					Spearman Rank Correlation					Spearman Rank Correlation										Spearman Rank Correlation
Statistic	82				Statistic	86.5				Statistic	82				Statistic	70									Statistic	81
Mean	73.5				Mean	73.5				Mean	73.5				Mean	73.5									Mean	73.5
Variance	61.25				Variance	57.75				Variance	61.25				Variance	61.25									Variance	57.75
Rho (corrected for ties)	0.485714				Rho (corrected for ties)	0.765037				Rho (corrected for ties)	0.485714				Rho (corrected for ties)	-0.2									Rho (corrected for ties)	0.441367
Exact Method					Exact Method					Exact Method					Exact Method										Exact Method
Upper Probability	0.9986				Upper Probability	0.9986				Upper Probability	0.9986				Upper Probability	0.9986									Upper Probability	0.9986
Lower Probability	0.001389				Lower Probability	0.001389				Lower Probability	0.001389				Lower Probability	0.001389									Lower Probability	0.001389
Two-sided Probability	0.002778	** (P<=0.01) (two-sided)			Two-sided Probability	0.002778	** (P<=0.01) (two-sided)			Two-sided Probability	0.002778	** (P<=0.01) (two-sided)			Two-sided Probability	0.002778	** (P<=0.01) (two-sided)								Two-sided Probability	0.002778	** (P<=0.01) (two-sided)
Kendall Rank Correlation					Kendall Rank Correlation					Kendall Rank Correlation					Kendall Rank Correlation										Kendall Rank Correlation
Statistic	5				Statistic	9				Statistic	5				Statistic	-3									Statistic	5
Mean	0				Mean	0				Mean	0				Mean	0									Mean	0
Variance	28.3333				Variance	26.3333				Variance	28.3333				Variance	28.3333									Variance	26.3333
Tau (corrected for ties)	0.333333				Tau (corrected for ties)	0.644503				Tau (corrected for ties)	0.333333				Tau (corrected for ties)	-0.2									Tau (corrected for ties)	0.358057
Normal Approximation Method					Normal Approximation Method					Normal Approximation Method					Normal Approximation Method										Normal Approximation Method
Caution: the probabilities given are approximates for large N.					Caution: the probabilities given are approximates for large N.					Caution: the probabilities given are approximates for large N.					Caution: the probabilities given are approximates for large N.										Caution: the probabilities given are approximates for large N.
Z	0.939336				Z	1.75384				Z	0.939336				Z	-0.563602									Z	0.974355
With Continuity Correction (for ABS(Z)<=2)					With Continuity Correction (for ABS(Z)<=2)					With Continuity Correction (for ABS(Z)<=2)					With Continuity Correction (for ABS(Z)<=2)										With Continuity Correction (for ABS(Z)<=2)
Upper Probability	0.1989				Upper Probability	0.04882				Upper Probability	0.1989				Upper Probability	0.7446									Upper Probability	0.1903
Lower Probability	0.8493				Lower Probability	0.9679				Lower Probability	0.8493				Lower Probability	0.3193									Lower Probability	0.8581
Two-sided Probability	0.3979	Not Significant (P>0.05) (two-sided)			Two-sided Probability	0.09764	Not Significant (P>0.05) (two-sided)			Two-sided Probability	0.3979	Not Significant (P>0.05) (two-sided)			Two-sided Probability	0.6386	Not Significant (P>0.05) (two-sided)								Two-sided Probability	0.3805	Not Significant (P>0.05) (two-sided)
Without Continuity Correction (for ABS(Z)>2)					Without Continuity Correction (for ABS(Z)>2)					Without Continuity Correction (for ABS(Z)>2)					Without Continuity Correction (for ABS(Z)>2)										Without Continuity Correction (for ABS(Z)>2)
Upper Probability	0.1738				Upper Probability	0.03973				Upper Probability	0.1738				Upper Probability	0.7135									Upper Probability	0.1649
Lower Probability	0.8262				Lower Probability	0.9603				Lower Probability	0.8262				Lower Probability	0.2865									Lower Probability	0.8351
Two-sided Probability	0.3476	Not Significant (P>0.05) (two-sided)			Two-sided Probability	0.07946	Not Significant (P>0.05) (two-sided)			Two-sided Probability	0.3476	Not Significant (P>0.05) (two-sided)			Two-sided Probability	0.573	Not Significant (P>0.05) (two-sided)								Two-sided Probability	0.3299	Not Significant (P>0.05) (two-sided)
Exact Method(Not corrected for ties)					Exact Method(Not corrected for ties)					Exact Method(Not corrected for ties)					Exact Method(Not corrected for ties)										Exact Method(Not corrected for ties)
Upper Probability	0.2347				Upper Probability	0.06806				Upper Probability	0.2347				Upper Probability	0.3597									Upper Probability	0.2347
Lower Probability	0.7653				Lower Probability	0.9319				Lower Probability	0.7653				Lower Probability	0.6403									Lower Probability	0.7653
Two-sided Probability	0.4694	Not Significant (P>0.05) (two-sided)			Two-sided Probability	0.1361	Not Significant (P>0.05) (two-sided)			Two-sided Probability	0.4694	Not Significant (P>0.05) (two-sided)			Two-sided Probability	0.7194	Not Significant (P>0.05) (two-sided)								Two-sided Probability	0.4694	Not Significant (P>0.05) (two-sided)
E1
Glu 15min Post-ef	MT1-E1				Glu 15min Post-ef	VZE1				Glu 15min Post-ef	FT1-E2				Glu 15min Post-ef	FT2-E3									Glu 15min Post-ef	VZE2
87	80.6				87	2				89	79.5				91	73.5									91	3.6
104	74.38				104	4.6				122	73.8				101	63.8									101	4.6
120	85.6				120	4.6				153	84				116	81.1									116	4.6
106	80.2				106	4				112	78.53				96	70.9									96	4
129	83.4				129	4.16				146	81.7				132	72.9									132	3.8
90	77.1				90	4.16				82	76.3				91	67.9									91	3.8
Nonparametric Correlation					Nonparametric Correlation					Nonparametric Correlation					Nonparametric Correlation										Nonparametric Correlation
Spearman Rank Correlation					Spearman Rank Correlation					Spearman Rank Correlation					Spearman Rank Correlation										Spearman Rank Correlation
Statistic	83				Statistic	81				Statistic	84				Statistic	77.5									Statistic	81.75
Mean	73.5				Mean	73.5				Mean	73.5				Mean	73.5									Mean	73.5
Variance	61.25				Variance	57.75				Variance	61.25				Variance	59.5									Variance	56.1
Rho (corrected for ties)	0.542857				Rho (corrected for ties)	0.441367				Rho (corrected for ties)	0.6				Rho (corrected for ties)	0.231908									Rho (corrected for ties)	0.492592
Exact Method					Exact Method					Exact Method					Exact Method										Exact Method
Upper Probability	0.9986				Upper Probability	0.9986				Upper Probability	0.9986				Upper Probability	0.9986									Upper Probability	0.9986
Lower Probability	0.001389				Lower Probability	0.001389				Lower Probability	0.001389				Lower Probability	0.001389									Lower Probability	0.001389
Two-sided Probability	0.002778	** (P<=0.01) (two-sided)			Two-sided Probability	0.002778	** (P<=0.01) (two-sided)			Two-sided Probability	0.002778	** (P<=0.01) (two-sided)			Two-sided Probability	0.002778	** (P<=0.01) (two-sided)								Two-sided Probability	0.002778	** (P<=0.01) (two-sided)
Kendall Rank Correlation					Kendall Rank Correlation					Kendall Rank Correlation					Kendall Rank Correlation										Kendall Rank Correlation
Statistic	5				Statistic	5				Statistic	7				Statistic	2									Statistic	6
Mean	0				Mean	0				Mean	0				Mean	0									Mean	0
Variance	28.3333				Variance	26.3333				Variance	28.3333				Variance	27.3333									Variance	25.4667
Tau (corrected for ties)	0.333333				Tau (corrected for ties)	0.358057				Tau (corrected for ties)	0.466667				Tau (corrected for ties)	0.138013									Tau (corrected for ties)	0.44475
Normal Approximation Method					Normal Approximation Method					Normal Approximation Method					Normal Approximation Method										Normal Approximation Method
Caution: the probabilities given are approximates for large N.					Caution: the probabilities given are approximates for large N.					Caution: the probabilities given are approximates for large N.					Caution: the probabilities given are approximates for large N.										Caution: the probabilities given are approximates for large N.
Z	0.939336				Z	0.974355				Z	1.31507				Z	0.382546									Z	1.18895
With Continuity Correction (for ABS(Z)<=2)					With Continuity Correction (for ABS(Z)<=2)					With Continuity Correction (for ABS(Z)<=2)					With Continuity Correction (for ABS(Z)<=2)										With Continuity Correction (for ABS(Z)<=2)
Upper Probability	0.1989				Upper Probability	0.1903				Upper Probability	0.111				Upper Probability	0.3871									Upper Probability	0.1379
Lower Probability	0.8493				Lower Probability	0.8581				Lower Probability	0.9206				Lower Probability	0.6837									Lower Probability	0.9011
Two-sided Probability	0.3979	Not Significant (P>0.05) (two-sided)			Two-sided Probability	0.3805	Not Significant (P>0.05) (two-sided)			Two-sided Probability	0.222	Not Significant (P>0.05) (two-sided)			Two-sided Probability	0.7742	Not Significant (P>0.05) (two-sided)								Two-sided Probability	0.2758	Not Significant (P>0.05) (two-sided)
Without Continuity Correction (for ABS(Z)>2)					Without Continuity Correction (for ABS(Z)>2)					Without Continuity Correction (for ABS(Z)>2)					Without Continuity Correction (for ABS(Z)>2)										Without Continuity Correction (for ABS(Z)>2)
Upper Probability	0.1738				Upper Probability	0.1649				Upper Probability	0.09424				Upper Probability	0.351									Upper Probability	0.1172
Lower Probability	0.8262				Lower Probability	0.8351				Lower Probability	0.9058				Lower Probability	0.649									Lower Probability	0.8828
Two-sided Probability	0.3476	Not Significant (P>0.05) (two-sided)			Two-sided Probability	0.3299	Not Significant (P>0.05) (two-sided)			Two-sided Probability	0.1885	Not Significant (P>0.05) (two-sided)			Two-sided Probability	0.7021	Not Significant (P>0.05) (two-sided)								Two-sided Probability	0.2345	Not Significant (P>0.05) (two-sided)
Exact Method(Not corrected for ties)					Exact Method(Not corrected for ties)					Exact Method(Not corrected for ties)					Exact Method(Not corrected for ties)										Exact Method(Not corrected for ties)
Upper Probability	0.2347				Upper Probability	0.2347				Upper Probability	0.1361				Upper Probability	0.5									Upper Probability	0.2347
Lower Probability	0.7653				Lower Probability	0.7653				Lower Probability	0.8639				Lower Probability	0.5									Lower Probability	0.7653
Two-sided Probability	0.4694	Not Significant (P>0.05) (two-sided)			Two-sided Probability	0.4694	Not Significant (P>0.05) (two-sided)			Two-sided Probability	0.2722	Not Significant (P>0.05) (two-sided)			Two-sided Probability	1	Not Significant (P>0.05) (two-sided)								Two-sided Probability	0.4694	Not Significant (P>0.05) (two-sided)
																														E2
																															E1
La Pre-eff	TPsych1T3									La Pre-eff	TPsych2T3					La Pre-eff	V.A.E1					La Pre-eff	TPsych1T2			La Pre-eff	TPsych2T2						La Pre-eff	V.A. E3
1.5	36									1.5	25					1.9	6.8					1.9	28			1.9	24						1.6	6.4
2.6	29									2.6	22					1.9	7					1.9	28			1.9	21						2.1	6.9
3	28									3	21					2.2	7					2.2	24			2.2	18						2.4	6.9
1.3	30									1.3	21					1.7	6.4					1.7	31			1.7	23						1.9	7.2
1.2	35									1.2	22					0.9	6.2					0.9	31			0.9	19						1.1	6.6
1.9	30									1.9	24					2.7	6.2					2.7	36			2.7	22						1.9	6.6
Nonparametric Correlation										Nonparametric Correlation						Nonparametric Correlation						Nonparametric Correlation				Nonparametric Correlation							Nonparametric Correlation
Spearman Rank Correlation										Spearman Rank Correlation						Spearman Rank Correlation						Spearman Rank Correlation				Spearman Rank Correlation							Spearman Rank Correlation
Statistic	60									Statistic	71					Statistic	77.25					Statistic	72			Statistic	72.5						Statistic	83.75
Mean	73.5									Mean	73.5					Mean	73.5					Mean	73.5			Mean	73.5						Mean	73.5
Variance	59.5									Variance	57.75					Variance	56.1					Variance	56.1			Variance	59.5						Variance	56.1
Rho (corrected for ties)	-0.782691									Rho (corrected for ties)	-0.147122					Rho (corrected for ties)	0.223906					Rho (corrected for ties)	-0.0895622			Rho (corrected for ties)	-0.0579771						Rho (corrected for ties)	0.612008
Exact Method										Exact Method						Exact Method						Exact Method				Exact Method							Exact Method
Upper Probability	0.9986									Upper Probability	0.9986					Upper Probability	0.9986					Upper Probability	0.9986			Upper Probability	0.9986						Upper Probability	0.9986
Lower Probability	0.001389									Lower Probability	0.001389					Lower Probability	0.001389					Lower Probability	0.001389			Lower Probability	0.001389						Lower Probability	0.001389
Two-sided Probability	0.002778	** (P<=0.01) (two-sided)								Two-sided Probability	0.002778	** (P<=0.01) (two-sided)				Two-sided Probability	0.002778	** (P<=0.01) (two-sided)				Two-sided Probability	0.002778	** (P<=0.01) (two-sided)		Two-sided Probability	0.002778	** (P<=0.01) (two-sided)					Two-sided Probability	0.002778	** (P<=0.01) (two-sided)
Kendall Rank Correlation										Kendall Rank Correlation						Kendall Rank Correlation						Kendall Rank Correlation				Kendall Rank Correlation							Kendall Rank Correlation
Statistic	-10									Statistic	-3					Statistic	4					Statistic	-3			Statistic	0						Statistic	6
Mean	0									Mean	0					Mean	0					Mean	0			Mean	0						Mean	0
Variance	27.3333									Variance	26.3333					Variance	25.4667					Variance	25.4667			Variance	27.3333						Variance	25.4667
Tau (corrected for ties)	-0.690066									Tau (corrected for ties)	-0.214834					Tau (corrected for ties)	0.2965					Tau (corrected for ties)	-0.222375			Tau (corrected for ties)	0						Tau (corrected for ties)	0.44475
Normal Approximation Method										Normal Approximation Method						Normal Approximation Method						Normal Approximation Method				Normal Approximation Method							Normal Approximation Method
Caution: the probabilities given are approximates for large N.										Caution: the probabilities given are approximates for large N.						Caution: the probabilities given are approximates for large N.						Caution: the probabilities given are approximates for large N.				Caution: the probabilities given are approximates for large N.							Caution: the probabilities given are approximates for large N.
Z	-1.91273									Z	-0.584613					Z	0.792636					Z	-0.594477			Z	0						Z	1.18895
With Continuity Correction (for ABS(Z)<=2)										With Continuity Correction (for ABS(Z)<=2)						With Continuity Correction (for ABS(Z)<=2)						With Continuity Correction (for ABS(Z)<=2)				With Continuity Correction (for ABS(Z)<=2)							With Continuity Correction (for ABS(Z)<=2)
Upper Probability	0.9777									Upper Probability	0.7524					Upper Probability	0.244					Upper Probability	0.756			Upper Probability	0.5381						Upper Probability	0.1379
Lower Probability	0.0346									Lower Probability	0.3131					Lower Probability	0.8137					Lower Probability	0.3102			Lower Probability	0.5381						Lower Probability	0.9011
Two-sided Probability	0.0692	Not Significant (P>0.05) (two-sided)								Two-sided Probability	0.6261	Not Significant (P>0.05) (two-sided)				Two-sided Probability	0.488	Not Significant (P>0.05) (two-sided)				Two-sided Probability	0.6203	Not Significant (P>0.05) (two-sided)		Two-sided Probability	1	Not Significant (P>0.05) (two-sided)					Two-sided Probability	0.2758	Not Significant (P>0.05) (two-sided)
Without Continuity Correction (for ABS(Z)>2)										Without Continuity Correction (for ABS(Z)>2)						Without Continuity Correction (for ABS(Z)>2)						Without Continuity Correction (for ABS(Z)>2)				Without Continuity Correction (for ABS(Z)>2)							Without Continuity Correction (for ABS(Z)>2)
Upper Probability	0.9721									Upper Probability	0.7206					Upper Probability	0.214					Upper Probability	0.7239			Upper Probability	0.5						Upper Probability	0.1172
Lower Probability	0.02789									Lower Probability	0.2794					Lower Probability	0.786					Lower Probability	0.2761			Lower Probability	0.5						Lower Probability	0.8828
Two-sided Probability	0.05578	Not Significant (P>0.05) (two-sided)								Two-sided Probability	0.5588	Not Significant (P>0.05) (two-sided)				Two-sided Probability	0.428	Not Significant (P>0.05) (two-sided)				Two-sided Probability	0.5522	Not Significant (P>0.05) (two-sided)		Two-sided Probability	1	Not Significant (P>0.05) (two-sided)					Two-sided Probability	0.2345	Not Significant (P>0.05) (two-sided)
Exact Method(Not corrected for ties)										Exact Method(Not corrected for ties)						Exact Method(Not corrected for ties)						Exact Method(Not corrected for ties)				Exact Method(Not corrected for ties)							Exact Method(Not corrected for ties)
Upper Probability	0.06806									Upper Probability	0.3597					Upper Probability	0.3597					Upper Probability	0.3597			Upper Probability	0.6403						Upper Probability	0.2347
Lower Probability	0.9319									Lower Probability	0.6403					Lower Probability	0.6403					Lower Probability	0.6403			Lower Probability	0.3597						Lower Probability	0.7653
Two-sided Probability	0.1361	Not Significant (P>0.05) (two-sided)								Two-sided Probability	0.7194	Not Significant (P>0.05) (two-sided)				Two-sided Probability	0.7194	Not Significant (P>0.05) (two-sided)				Two-sided Probability	0.7194	Not Significant (P>0.05) (two-sided)		Two-sided Probability	0.7194	Not Significant (P>0.05) (two-sided)					Two-sided Probability	0.4694	Not Significant (P>0.05) (two-sided)
																E1
La 5 min Post-eff	TPsych1T3									La 5 min Post-eff	TPsych2T3					La 5 min Post-eff	V.A.E1					La 5 min Post-eff	TPsych1T2			La 5 min Post-eff	TPsych2T2						La 5 min Post-eff	V.A. E3
9.7	36									9.7	25					5.7	6.8					5.7	28			5.7	24						8.1	6.4
12.7	29									12.7	22					6.8	7					6.8	28			6.8	21						9.8	6.9
13.4	28									13.4	21					12.2	7					12.2	24			12.2	18						11.6	6.9
10.3	30									10.3	21					5.3	6.4					5.3	31			5.3	23						8.6	7.2
7	35									7	22					4	6.2					4	31			4	19						7.6	6.6
11.1	30									11.1	24					7.4	6.2					7.4	36			7.4	22						9.6	6.6
Nonparametric Correlation										Nonparametric Correlation						Nonparametric Correlation						Nonparametric Correlation				Nonparametric Correlation							Nonparametric Correlation
Spearman Rank Correlation										Spearman Rank Correlation						Spearman Rank Correlation						Spearman Rank Correlation				Spearman Rank Correlation							Spearman Rank Correlation
Statistic	57.5									Statistic	66.5					Statistic	82					Statistic	67			Statistic	68						Statistic	82
Mean	73.5									Mean	73.5					Mean	73.5					Mean	73.5			Mean	73.5						Mean	73.5
Variance	59.5									Variance	57.75					Variance	57.75					Variance	57.75			Variance	61.25						Variance	57.75
Rho (corrected for ties)	-0.927634									Rho (corrected for ties)	-0.411943					Rho (corrected for ties)	0.500216					Rho (corrected for ties)	-0.382518			Rho (corrected for ties)	-0.314286						Rho (corrected for ties)	0.500216
Exact Method										Exact Method						Exact Method						Exact Method				Exact Method							Exact Method
Upper Probability	0.9986									Upper Probability	0.9986					Upper Probability	0.9986					Upper Probability	0.9986			Upper Probability	0.9986						Upper Probability	0.9986
Lower Probability	0.001389									Lower Probability	0.001389					Lower Probability	0.001389					Lower Probability	0.001389			Lower Probability	0.001389						Lower Probability	0.001389
Two-sided Probability	0.002778	** (P<=0.01) (two-sided)								Two-sided Probability	0.002778	** (P<=0.01) (two-sided)				Two-sided Probability	0.002778	** (P<=0.01) (two-sided)				Two-sided Probability	0.002778	** (P<=0.01) (two-sided)		Two-sided Probability	0.002778	** (P<=0.01) (two-sided)					Two-sided Probability	0.002778	** (P<=0.01) (two-sided)
Kendall Rank Correlation										Kendall Rank Correlation						Kendall Rank Correlation						Kendall Rank Correlation				Kendall Rank Correlation							Kendall Rank Correlation
Statistic	-12									Statistic	-5					Statistic	7					Statistic	-5			Statistic	-3						Statistic	5
Mean	0									Mean	0					Mean	0					Mean	0			Mean	0						Mean	0
Variance	27.3333									Variance	26.3333					Variance	26.3333					Variance	26.3333			Variance	28.3333						Variance	26.3333
Tau (corrected for ties)	-0.828079									Tau (corrected for ties)	-0.358057					Tau (corrected for ties)	0.50128					Tau (corrected for ties)	-0.358057			Tau (corrected for ties)	-0.2						Tau (corrected for ties)	0.358057
Normal Approximation Method										Normal Approximation Method						Normal Approximation Method						Normal Approximation Method				Normal Approximation Method							Normal Approximation Method
Caution: the probabilities given are approximates for large N.										Caution: the probabilities given are approximates for large N.						Caution: the probabilities given are approximates for large N.						Caution: the probabilities given are approximates for large N.				Caution: the probabilities given are approximates for large N.							Caution: the probabilities given are approximates for large N.
Z	-2.29528									Z	-0.974355					Z	1.3641					Z	-0.974355			Z	-0.563602						Z	0.974355
With Continuity Correction (for ABS(Z)<=2)										With Continuity Correction (for ABS(Z)<=2)						With Continuity Correction (for ABS(Z)<=2)						With Continuity Correction (for ABS(Z)<=2)				With Continuity Correction (for ABS(Z)<=2)							With Continuity Correction (for ABS(Z)<=2)
Upper Probability	0.9916									Upper Probability	0.8581					Upper Probability	0.1026					Upper Probability	0.8581			Upper Probability	0.7446						Upper Probability	0.1903
Lower Probability	0.01392									Lower Probability	0.1903					Lower Probability	0.9281					Lower Probability	0.1903			Lower Probability	0.3193						Lower Probability	0.8581
Two-sided Probability	0.02783	* (P<=0.05) (two-sided)								Two-sided Probability	0.3805	Not Significant (P>0.05) (two-sided)				Two-sided Probability	0.2053	Not Significant (P>0.05) (two-sided)				Two-sided Probability	0.3805	Not Significant (P>0.05) (two-sided)		Two-sided Probability	0.6386	Not Significant (P>0.05) (two-sided)					Two-sided Probability	0.3805	Not Significant (P>0.05) (two-sided)
Without Continuity Correction (for ABS(Z)>2)										Without Continuity Correction (for ABS(Z)>2)						Without Continuity Correction (for ABS(Z)>2)						Without Continuity Correction (for ABS(Z)>2)				Without Continuity Correction (for ABS(Z)>2)							Without Continuity Correction (for ABS(Z)>2)
Upper Probability	0.9891									Upper Probability	0.8351					Upper Probability	0.08627					Upper Probability	0.8351			Upper Probability	0.7135						Upper Probability	0.1649
Lower Probability	0.01086									Lower Probability	0.1649					Lower Probability	0.9137					Lower Probability	0.1649			Lower Probability	0.2865						Lower Probability	0.8351
Two-sided Probability	0.02172	* (P<=0.05) (two-sided)								Two-sided Probability	0.3299	Not Significant (P>0.05) (two-sided)				Two-sided Probability	0.1725	Not Significant (P>0.05) (two-sided)				Two-sided Probability	0.3299	Not Significant (P>0.05) (two-sided)		Two-sided Probability	0.573	Not Significant (P>0.05) (two-sided)					Two-sided Probability	0.3299	Not Significant (P>0.05) (two-sided)
Exact Method(Not corrected for ties)										Exact Method(Not corrected for ties)						Exact Method(Not corrected for ties)						Exact Method(Not corrected for ties)				Exact Method(Not corrected for ties)							Exact Method(Not corrected for ties)
Upper Probability	0.02778									Upper Probability	0.2347					Upper Probability	0.1361					Upper Probability	0.2347			Upper Probability	0.3597						Upper Probability	0.2347
Lower Probability	0.9722									Lower Probability	0.7653					Lower Probability	0.8639					Lower Probability	0.7653			Lower Probability	0.6403						Lower Probability	0.7653
Two-sided Probability	0.05556	Not Significant (P>0.05) (two-sided)								Two-sided Probability	0.4694	Not Significant (P>0.05) (two-sided)				Two-sided Probability	0.2722	Not Significant (P>0.05) (two-sided)				Two-sided Probability	0.4694	Not Significant (P>0.05) (two-sided)		Two-sided Probability	0.7194	Not Significant (P>0.05) (two-sided)					Two-sided Probability	0.4694	Not Significant (P>0.05) (two-sided)
																E1
La 15 min Post-eff	TPsych1T3									La 15 min Post-eff	TPsych2T3					La 15 min Post-eff	V.A.E1					La 15 min Post-eff	TPsych1T2										La 15 min Post-eff	TPsych2T2				La 15 min Post-eff	TPsych2T3									La 15 min Post-eff	V.A. E3
6.4	36									6.4	25					4.4	6.8					4.4	28										4.4	24				4.4	25									6.3	6.4
9.9	29									9.9	22					6.7	7					6.7	28										6.7	21				6.7	22									7.5	6.9
9.9	28									9.9	21					8.2	7					8.2	24										8.2	18				8.2	21									8.1	6.9
7.8	30									7.8	21					3.6	6.4					3.6	31										3.6	23				3.6	21									7.1	7.2
5.2	35									5.2	22					2.9	6.2					2.9	31										2.9	19				2.9	22									6.1	6.6
8.7	30									8.7	24					6.3	6.2					6.3	36										6.3	22				6.3	24									6.1	6.6
Nonparametric Correlation										Nonparametric Correlation						Nonparametric Correlation						Nonparametric Correlation											Nonparametric Correlation					Nonparametric Correlation										Nonparametric Correlation
Spearman Rank Correlation										Spearman Rank Correlation						Spearman Rank Correlation						Spearman Rank Correlation											Spearman Rank Correlation					Spearman Rank Correlation										Spearman Rank Correlation
Statistic	58									Statistic	67.5					Statistic	86					Statistic	63.5										Statistic	67				Statistic	71									Statistic	84
Mean	73.5									Mean	73.5					Mean	73.5					Mean	73.5										Mean	73.5				Mean	73.5									Mean	73.5
Variance	57.8									Variance	56.1					Variance	57.75					Variance	57.75										Variance	61.25				Variance	57.75									Variance	56.1
Rho (corrected for ties)	-0.911765									Rho (corrected for ties)	-0.358249					Rho (corrected for ties)	0.735612					Rho (corrected for ties)	-0.58849										Rho (corrected for ties)	-0.371429				Rho (corrected for ties)	-0.147122									Rho (corrected for ties)	0.626936
Exact Method										Exact Method						Exact Method						Exact Method											Exact Method					Exact Method										Exact Method
Upper Probability	0.9986									Upper Probability	0.9986					Upper Probability	0.9986					Upper Probability	0.9986										Upper Probability	0.9986				Upper Probability	0.9986									Upper Probability	0.9986
Lower Probability	0.001389									Lower Probability	0.001389					Lower Probability	0.001389					Lower Probability	0.001389										Lower Probability	0.001389				Lower Probability	0.001389									Lower Probability	0.001389
Two-sided Probability	0.002778	** (P<=0.01) (two-sided)								Two-sided Probability	0.002778	** (P<=0.01) (two-sided)				Two-sided Probability	0.002778	** (P<=0.01) (two-sided)				Two-sided Probability	0.002778	** (P<=0.01) (two-sided)									Two-sided Probability	0.002778	** (P<=0.01) (two-sided)			Two-sided Probability	0.002778	** (P<=0.01) (two-sided)								Two-sided Probability	0.002778
Kendall Rank Correlation										Kendall Rank Correlation						Kendall Rank Correlation						Kendall Rank Correlation											Kendall Rank Correlation					Kendall Rank Correlation										Kendall Rank Correlation
Statistic	-11									Statistic	-4					Statistic	9					Statistic	-7										Statistic	-5				Statistic	-3									Statistic	5
Mean	0									Mean	0					Mean	0					Mean	0										Mean	0				Mean	0									Mean	0
Variance	26.4									Variance	25.4667					Variance	26.3333					Variance	26.3333										Variance	28.3333				Variance	26.3333									Variance	25.4667
Tau (corrected for ties)	-0.785714									Tau (corrected for ties)	-0.2965					Tau (corrected for ties)	0.644503					Tau (corrected for ties)	-0.50128										Tau (corrected for ties)	-0.333333				Tau (corrected for ties)	-0.214834									Tau (corrected for ties)	0.370625
Normal Approximation Method										Normal Approximation Method						Normal Approximation Method						Normal Approximation Method											Normal Approximation Method					Normal Approximation Method										Normal Approximation Method
Caution: the probabilities given are approximates for large N.										Caution: the probabilities given are approximates for large N.						Caution: the probabilities given are approximates for large N.						Caution: the probabilities given are approximates for large N.											Caution: the probabilities given are approximates for large N.					Caution: the probabilities given are approximates for large N.										Caution: the probabilities given are approximates for large N.
Z	-2.14087									Z	-0.792636					Z	1.75384					Z	-1.3641										Z	-0.939336				Z	-0.584613									Z	0.990795
With Continuity Correction (for ABS(Z)<=2)										With Continuity Correction (for ABS(Z)<=2)						With Continuity Correction (for ABS(Z)<=2)						With Continuity Correction (for ABS(Z)<=2)											With Continuity Correction (for ABS(Z)<=2)					With Continuity Correction (for ABS(Z)<=2)										With Continuity Correction (for ABS(Z)<=2)
Upper Probability	0.9874									Upper Probability	0.8137					Upper Probability	0.04882					Upper Probability	0.9281										Upper Probability	0.8493				Upper Probability	0.7524									Upper Probability	0.1863
Lower Probability	0.0205									Lower Probability	0.244					Lower Probability	0.9679					Lower Probability	0.1026										Lower Probability	0.1989				Lower Probability	0.3131									Lower Probability	0.8621
Two-sided Probability	0.041	* (P<=0.05) (two-sided)								Two-sided Probability	0.488	Not Significant (P>0.05) (two-sided)				Two-sided Probability	0.09764	Not Significant (P>0.05) (two-sided)				Two-sided Probability	0.2053	Not Significant (P>0.05) (two-sided)									Two-sided Probability	0.3979	Not Significant (P>0.05) (two-sided)			Two-sided Probability	0.6261	Not Significant (P>0.05) (two-sided)								Two-sided Probability	0.3725
Without Continuity Correction (for ABS(Z)>2)										Without Continuity Correction (for ABS(Z)>2)						Without Continuity Correction (for ABS(Z)>2)						Without Continuity Correction (for ABS(Z)>2)											Without Continuity Correction (for ABS(Z)>2)					Without Continuity Correction (for ABS(Z)>2)										Without Continuity Correction (for ABS(Z)>2)
Upper Probability	0.9839									Upper Probability	0.786					Upper Probability	0.03973					Upper Probability	0.9137										Upper Probability	0.8262				Upper Probability	0.7206									Upper Probability	0.1609
Lower Probability	0.01614									Lower Probability	0.214					Lower Probability	0.9603					Lower Probability	0.08627										Lower Probability	0.1738				Lower Probability	0.2794									Lower Probability	0.8391
Two-sided Probability	0.03228	* (P<=0.05) (two-sided)								Two-sided Probability	0.428	Not Significant (P>0.05) (two-sided)				Two-sided Probability	0.07946	Not Significant (P>0.05) (two-sided)				Two-sided Probability	0.1725	Not Significant (P>0.05) (two-sided)									Two-sided Probability	0.3476	Not Significant (P>0.05) (two-sided)			Two-sided Probability	0.5588	Not Significant (P>0.05) (two-sided)								Two-sided Probability	0.3218
Exact Method(Not corrected for ties)										Exact Method(Not corrected for ties)						Exact Method(Not corrected for ties)						Exact Method(Not corrected for ties)											Exact Method(Not corrected for ties)					Exact Method(Not corrected for ties)										Exact Method(Not corrected for ties)
Upper Probability	0.02778									Upper Probability	0.3597					Upper Probability	0.06806					Upper Probability	0.1361										Upper Probability	0.2347				Upper Probability	0.3597									Upper Probability	0.2347
Lower Probability	0.9722									Lower Probability	0.6403					Lower Probability	0.9319					Lower Probability	0.8639										Lower Probability	0.7653				Lower Probability	0.6403									Lower Probability	0.7653
Two-sided Probability	0.05556	Not Significant (P>0.05) (two-sided)								Two-sided Probability	0.7194	Not Significant (P>0.05) (two-sided)				Two-sided Probability	0.1361	Not Significant (P>0.05) (two-sided)				Two-sided Probability	0.2722	Not Significant (P>0.05) (two-sided)									Two-sided Probability	0.4694	Not Significant (P>0.05) (two-sided)			Two-sided Probability	0.7194	Not Significant (P>0.05) (two-sided)								Two-sided Probability	0.4694
																E1
Glu Pre-eff	TPsych1T3									Glu Pre-eff	TPsych2T3					Glu Pre-eff	V.A.E1					Glu Pre-eff	TPsych1T2										Glu Pre-eff	TPsych2T2				Glu Pre-eff	TPsych2T3									Glu Pre-eff	V.A. E3
98	36									98	25					102	6.8					102	28										102	24				102	25									97	6.4
94	29									94	22					103	7					103	28										103	21				103	22									97	6.9
111	28									111	21					111	7					111	24										111	18				111	21									108	6.9
100	30									100	21					104	6.4					104	31										104	23				104	21									82	7.2
132	35									132	22					124	6.2					124	31										124	19				124	22									122	6.6
95	30									95	24					98	6.2					98	36										98	22				98	24									89	6.6
Nonparametric Correlation										Nonparametric Correlation						Nonparametric Correlation						Nonparametric Correlation											Nonparametric Correlation					Nonparametric Correlation										Nonparametric Correlation
Spearman Rank Correlation										Spearman Rank Correlation						Spearman Rank Correlation						Spearman Rank Correlation											Spearman Rank Correlation					Spearman Rank Correlation										Spearman Rank Correlation
Statistic	76									Statistic	66					Statistic	74.5					Statistic	68.5										Statistic	62				Statistic	62									Statistic	67.75
Mean	73.5									Mean	73.5					Mean	73.5					Mean	73.5										Mean	73.5				Mean	73.5									Mean	73.5
Variance	59.5									Variance	57.75					Variance	57.75					Variance	57.75										Variance	61.25				Variance	57.75									Variance	56.1
Rho (corrected for ties)	0.144943									Rho (corrected for ties)	-0.441367					Rho (corrected for ties)	0.058849					Rho (corrected for ties)	-0.294245										Rho (corrected for ties)	-0.657143				Rho (corrected for ties)	-0.676763									Rho (corrected for ties)	-0.343322
Exact Method										Exact Method						Exact Method						Exact Method											Exact Method					Exact Method										Exact Method
Upper Probability	0.9986									Upper Probability	0.9986					Upper Probability	0.9986					Upper Probability	0.9986										Upper Probability	0.9986				Upper Probability	0.9986									Upper Probability	0.9986
Lower Probability	0.001389									Lower Probability	0.001389					Lower Probability	0.001389					Lower Probability	0.001389										Lower Probability	0.001389				Lower Probability	0.001389									Lower Probability	0.001389
Two-sided Probability	0.002778	** (P<=0.01) (two-sided)								Two-sided Probability	0.002778	** (P<=0.01) (two-sided)				Two-sided Probability	0.002778	** (P<=0.01) (two-sided)				Two-sided Probability	0.002778	** (P<=0.01) (two-sided)									Two-sided Probability	0.002778	** (P<=0.01) (two-sided)			Two-sided Probability	0.002778	** (P<=0.01) (two-sided)								Two-sided Probability	0.002778
Kendall Rank Correlation										Kendall Rank Correlation						Kendall Rank Correlation						Kendall Rank Correlation											Kendall Rank Correlation					Kendall Rank Correlation										Kendall Rank Correlation
Statistic	2									Statistic	-3					Statistic	1					Statistic	-3										Statistic	-7				Statistic	-7									Statistic	-4
Mean	0									Mean	0					Mean	0					Mean	0										Mean	0				Mean	0									Mean	0
Variance	27.3333									Variance	26.3333					Variance	26.3333					Variance	26.3333										Variance	28.3333				Variance	26.3333									Variance	25.4667
Tau (corrected for ties)	0.138013									Tau (corrected for ties)	-0.214834					Tau (corrected for ties)	0.0716115					Tau (corrected for ties)	-0.214834										Tau (corrected for ties)	-0.466667				Tau (corrected for ties)	-0.50128									Tau (corrected for ties)	-0.2965
Normal Approximation Method										Normal Approximation Method						Normal Approximation Method						Normal Approximation Method											Normal Approximation Method					Normal Approximation Method										Normal Approximation Method
Caution: the probabilities given are approximates for large N.										Caution: the probabilities given are approximates for large N.						Caution: the probabilities given are approximates for large N.						Caution: the probabilities given are approximates for large N.											Caution: the probabilities given are approximates for large N.					Caution: the probabilities given are approximates for large N.										Caution: the probabilities given are approximates for large N.
Z	0.382546									Z	-0.584613					Z	0.194871					Z	-0.584613										Z	-1.31507				Z	-1.3641									Z	-0.792636
With Continuity Correction (for ABS(Z)<=2)										With Continuity Correction (for ABS(Z)<=2)						With Continuity Correction (for ABS(Z)<=2)						With Continuity Correction (for ABS(Z)<=2)											With Continuity Correction (for ABS(Z)<=2)					With Continuity Correction (for ABS(Z)<=2)										With Continuity Correction (for ABS(Z)<=2)
Upper Probability	0.3871									Upper Probability	0.7524					Upper Probability	0.4612					Upper Probability	0.7524										Upper Probability	0.9206				Upper Probability	0.9281									Upper Probability	0.8137
Lower Probability	0.6837									Lower Probability	0.3131					Lower Probability	0.615					Lower Probability	0.3131										Lower Probability	0.111				Lower Probability	0.1026									Lower Probability	0.244
Two-sided Probability	0.7742	Not Significant (P>0.05) (two-sided)								Two-sided Probability	0.6261	Not Significant (P>0.05) (two-sided)				Two-sided Probability	0.9224	Not Significant (P>0.05) (two-sided)				Two-sided Probability	0.6261	Not Significant (P>0.05) (two-sided)									Two-sided Probability	0.222	Not Significant (P>0.05) (two-sided)			Two-sided Probability	0.2053	Not Significant (P>0.05) (two-sided)								Two-sided Probability	0.488
Without Continuity Correction (for ABS(Z)>2)										Without Continuity Correction (for ABS(Z)>2)						Without Continuity Correction (for ABS(Z)>2)						Without Continuity Correction (for ABS(Z)>2)											Without Continuity Correction (for ABS(Z)>2)					Without Continuity Correction (for ABS(Z)>2)										Without Continuity Correction (for ABS(Z)>2)
Upper Probability	0.351									Upper Probability	0.7206					Upper Probability	0.4227					Upper Probability	0.7206										Upper Probability	0.9058				Upper Probability	0.9137									Upper Probability	0.786
Lower Probability	0.649									Lower Probability	0.2794					Lower Probability	0.5773					Lower Probability	0.2794										Lower Probability	0.09424				Lower Probability	0.08627									Lower Probability	0.214
Two-sided Probability	0.7021	Not Significant (P>0.05) (two-sided)								Two-sided Probability	0.5588	Not Significant (P>0.05) (two-sided)				Two-sided Probability	0.8455	Not Significant (P>0.05) (two-sided)				Two-sided Probability	0.5588	Not Significant (P>0.05) (two-sided)									Two-sided Probability	0.1885	Not Significant (P>0.05) (two-sided)			Two-sided Probability	0.1725	Not Significant (P>0.05) (two-sided)								Two-sided Probability	0.428
Exact Method(Not corrected for ties)										Exact Method(Not corrected for ties)						Exact Method(Not corrected for ties)						Exact Method(Not corrected for ties)											Exact Method(Not corrected for ties)					Exact Method(Not corrected for ties)										Exact Method(Not corrected for ties)
Upper Probability	0.5									Upper Probability	0.3597					Upper Probability	0.5					Upper Probability	0.3597										Upper Probability	0.1361				Upper Probability	0.1361									Upper Probability	0.3597
Lower Probability	0.5									Lower Probability	0.6403					Lower Probability	0.5					Lower Probability	0.6403										Lower Probability	0.8639				Lower Probability	0.8639									Lower Probability	0.6403
Two-sided Probability	1	Not Significant (P>0.05) (two-sided)								Two-sided Probability	0.7194	Not Significant (P>0.05) (two-sided)				Two-sided Probability	1	Not Significant (P>0.05) (two-sided)				Two-sided Probability	0.7194	Not Significant (P>0.05) (two-sided)									Two-sided Probability	0.2722	Not Significant (P>0.05) (two-sided)			Two-sided Probability	0.2722	Not Significant (P>0.05) (two-sided)								Two-sided Probability	0.7194
																E1
Glu 5 min Pos-eff	TPsych1T3									Glu 5 min Pos-eff	TPsych2T3					Glu 5 min Pos-eff	V.A.E1					Glu 5 min Pos-eff	TPsych1T2										Glu 5 min Pos-eff	TPsych2T2				Glu 5 min Pos-eff	TPsych2T3									Glu 5 min Pos-eff	V.A. E3
92	36									92	25					93	6.8					93	28										93	24				93	25									93	6.4
149	29									149	22					124	7					124	28										124	21				124	22									128	6.9
193	28									193	21					151	7					151	24										151	18				151	21									127	6.9
138	30									138	21					113	6.4					113	31										113	23				113	21									109	7.2
159	35									159	22					138	6.2					138	31										138	19				138	22									146	6.6
104	30									104	24					94	6.2					94	36										94	22				94	24									117	6.6
Nonparametric Correlation										Nonparametric Correlation						Nonparametric Correlation						Nonparametric Correlation											Nonparametric Correlation					Nonparametric Correlation										Nonparametric Correlation
Spearman Rank Correlation										Spearman Rank Correlation						Spearman Rank Correlation						Spearman Rank Correlation											Spearman Rank Correlation					Spearman Rank Correlation										Spearman Rank Correlation
Statistic	62.5									Statistic	61					Statistic	78.5					Statistic	66.5										Statistic	57				Statistic	61									Statistic	76
Mean	73.5									Mean	73.5					Mean	73.5					Mean	73.5										Mean	73.5				Mean	73.5									Mean	73.5
Variance	59.5									Variance	57.75					Variance	57.75					Variance	57.75										Variance	61.25				Variance	57.75									Variance	57.75
Rho (corrected for ties)	-0.637748									Rho (corrected for ties)	-0.735612					Rho (corrected for ties)	0.294245					Rho (corrected for ties)	-0.411943										Rho (corrected for ties)	-0.942857				Rho (corrected for ties)	-0.735612									Rho (corrected for ties)	0.147122
Exact Method										Exact Method						Exact Method						Exact Method											Exact Method					Exact Method										Exact Method
Upper Probability	0.9986									Upper Probability	0.9986					Upper Probability	0.9986					Upper Probability	0.9986										Upper Probability	0.9986				Upper Probability	0.9986									Upper Probability	0.9986
Lower Probability	0.001389									Lower Probability	0.001389					Lower Probability	0.001389					Lower Probability	0.001389										Lower Probability	0.001389				Lower Probability	0.001389									Lower Probability	0.001389
Two-sided Probability	0.002778	** (P<=0.01) (two-sided)								Two-sided Probability	0.002778	** (P<=0.01) (two-sided)				Two-sided Probability	0.002778	** (P<=0.01) (two-sided)				Two-sided Probability	0.002778	** (P<=0.01) (two-sided)									Two-sided Probability	0.002778	** (P<=0.01) (two-sided)			Two-sided Probability	0.002778	** (P<=0.01) (two-sided)								Two-sided Probability	0.002778
Kendall Rank Correlation										Kendall Rank Correlation						Kendall Rank Correlation						Kendall Rank Correlation											Kendall Rank Correlation					Kendall Rank Correlation										Kendall Rank Correlation
Statistic	-8									Statistic	-9					Statistic	3					Statistic	-5										Statistic	-13				Statistic	-9									Statistic	1
Mean	0									Mean	0					Mean	0					Mean	0										Mean	0				Mean	0									Mean	0
Variance	27.3333									Variance	26.3333					Variance	26.3333					Variance	26.3333										Variance	28.3333				Variance	26.3333									Variance	26.3333
Tau (corrected for ties)	-0.552052									Tau (corrected for ties)	-0.644503					Tau (corrected for ties)	0.214834					Tau (corrected for ties)	-0.358057										Tau (corrected for ties)	-0.866667				Tau (corrected for ties)	-0.644503									Tau (corrected for ties)	0.0716115
Normal Approximation Method										Normal Approximation Method						Normal Approximation Method						Normal Approximation Method											Normal Approximation Method					Normal Approximation Method										Normal Approximation Method
Caution: the probabilities given are approximates for large N.										Caution: the probabilities given are approximates for large N.						Caution: the probabilities given are approximates for large N.						Caution: the probabilities given are approximates for large N.											Caution: the probabilities given are approximates for large N.					Caution: the probabilities given are approximates for large N.										Caution: the probabilities given are approximates for large N.
Z	-1.53018									Z	-1.75384					Z	0.584613					Z	-0.974355										Z	-2.44227				Z	-1.75384									Z	0.194871
With Continuity Correction (for ABS(Z)<=2)										With Continuity Correction (for ABS(Z)<=2)						With Continuity Correction (for ABS(Z)<=2)						With Continuity Correction (for ABS(Z)<=2)											With Continuity Correction (for ABS(Z)<=2)					With Continuity Correction (for ABS(Z)<=2)										With Continuity Correction (for ABS(Z)<=2)
Upper Probability	0.948									Upper Probability	0.9679					Upper Probability	0.3131					Upper Probability	0.8581										Upper Probability	0.9944				Upper Probability	0.9679									Upper Probability	0.4612
Lower Probability	0.07571									Lower Probability	0.04882					Lower Probability	0.7524					Lower Probability	0.1903										Lower Probability	0.009429				Lower Probability	0.04882									Lower Probability	0.615
Two-sided Probability	0.1514	Not Significant (P>0.05) (two-sided)								Two-sided Probability	0.09764	Not Significant (P>0.05) (two-sided)				Two-sided Probability	0.6261	Not Significant (P>0.05) (two-sided)				Two-sided Probability	0.3805	Not Significant (P>0.05) (two-sided)									Two-sided Probability	0.01886	* (P<=0.05) (two-sided)			Two-sided Probability	0.09764	Not Significant (P>0.05) (two-sided)								Two-sided Probability	0.9224
Without Continuity Correction (for ABS(Z)>2)										Without Continuity Correction (for ABS(Z)>2)						Without Continuity Correction (for ABS(Z)>2)						Without Continuity Correction (for ABS(Z)>2)											Without Continuity Correction (for ABS(Z)>2)					Without Continuity Correction (for ABS(Z)>2)										Without Continuity Correction (for ABS(Z)>2)
Upper Probability	0.937									Upper Probability	0.9603					Upper Probability	0.2794					Upper Probability	0.8351										Upper Probability	0.9927				Upper Probability	0.9603									Upper Probability	0.4227
Lower Probability	0.06299									Lower Probability	0.03973					Lower Probability	0.7206					Lower Probability	0.1649										Lower Probability	0.007298				Lower Probability	0.03973									Lower Probability	0.5773
Two-sided Probability	0.126	Not Significant (P>0.05) (two-sided)								Two-sided Probability	0.07946	Not Significant (P>0.05) (two-sided)				Two-sided Probability	0.5588	Not Significant (P>0.05) (two-sided)				Two-sided Probability	0.3299	Not Significant (P>0.05) (two-sided)									Two-sided Probability	0.0146	* (P<=0.05) (two-sided)			Two-sided Probability	0.07946	Not Significant (P>0.05) (two-sided)								Two-sided Probability	0.8455
Exact Method(Not corrected for ties)										Exact Method(Not corrected for ties)						Exact Method(Not corrected for ties)						Exact Method(Not corrected for ties)											Exact Method(Not corrected for ties)					Exact Method(Not corrected for ties)										Exact Method(Not corrected for ties)
Upper Probability	0.1361									Upper Probability	0.06806					Upper Probability	0.3597					Upper Probability	0.2347										Upper Probability	0.008333				Upper Probability	0.06806									Upper Probability	0.5
Lower Probability	0.8639									Lower Probability	0.9319					Lower Probability	0.6403					Lower Probability	0.7653										Lower Probability	0.9917				Lower Probability	0.9319									Lower Probability	0.5
Two-sided Probability	0.2722	Not Significant (P>0.05) (two-sided)								Two-sided Probability	0.1361	Not Significant (P>0.05) (two-sided)				Two-sided Probability	0.7194	Not Significant (P>0.05) (two-sided)				Two-sided Probability	0.4694	Not Significant (P>0.05) (two-sided)									Two-sided Probability	0.01667	* (P<=0.05) (two-sided)			Two-sided Probability	0.1361	Not Significant (P>0.05) (two-sided)								Two-sided Probability	1
																E1
Glu 15 min Pos-eff	TPsych1T3									Glu 15 min Pos-eff	TPsych2T3					Glu 15 min Pos-eff	V.A.E1					Glu 15 min Pos-eff	TPsych1T2										Glu 15 min Pos-eff	TPsych2T2				Glu 15 min Pos-eff	TPsych2T3									Glu 15 min Pos-eff	V.A. E3
92	36									92	25					87	6.8					87	28										87	24				87	25									91	6.4
149	29									149	22					104	7					104	28										104	21				104	22									101	6.9
193	28									193	21					120	7					120	24										120	18				120	21									116	6.9
138	30									138	21					106	6.4					106	31										106	23				106	21									96	7.2
159	35									159	22					129	6.2					129	31										129	19				129	22									132	6.6
104	30									104	24					90	6.2					90	36										90	22				90	24									91	6.6
Nonparametric Correlation										Nonparametric Correlation						Nonparametric Correlation						Nonparametric Correlation											Nonparametric Correlation					Nonparametric Correlation										Nonparametric Correlation
Spearman Rank Correlation										Spearman Rank Correlation						Spearman Rank Correlation						Spearman Rank Correlation											Spearman Rank Correlation					Spearman Rank Correlation										Spearman Rank Correlation
Statistic	62.5									Statistic	61					Statistic	72					Statistic	72										Statistic	60				Statistic	61									Statistic	78.75
Mean	73.5									Mean	73.5					Mean	73.5					Mean	73.5										Mean	73.5				Mean	73.5									Mean	73.5
Variance	59.5									Variance	57.75					Variance	57.75					Variance	57.75										Variance	61.25				Variance	57.75									Variance	56.1
Rho (corrected for ties)	-0.637748									Rho (corrected for ties)	-0.735612					Rho (corrected for ties)	-0.0882735					Rho (corrected for ties)	-0.0882735										Rho (corrected for ties)	-0.771429				Rho (corrected for ties)	-0.735612									Rho (corrected for ties)	0.313468
Exact Method										Exact Method						Exact Method						Exact Method											Exact Method					Exact Method										Exact Method
Upper Probability	0.9986									Upper Probability	0.9986					Upper Probability	0.9986					Upper Probability	0.9986										Upper Probability	0.9986				Upper Probability	0.9986									Upper Probability	0.9986
Lower Probability	0.001389									Lower Probability	0.001389					Lower Probability	0.001389					Lower Probability	0.001389										Lower Probability	0.001389				Lower Probability	0.001389									Lower Probability	0.001389
Two-sided Probability	0.002778	** (P<=0.01) (two-sided)								Two-sided Probability	0.002778	** (P<=0.01) (two-sided)				Two-sided Probability	0.002778	** (P<=0.01) (two-sided)				Two-sided Probability	0.002778	** (P<=0.01) (two-sided)									Two-sided Probability	0.002778	** (P<=0.01) (two-sided)			Two-sided Probability	0.002778	** (P<=0.01) (two-sided)								Two-sided Probability	0.002778
Kendall Rank Correlation										Kendall Rank Correlation						Kendall Rank Correlation						Kendall Rank Correlation											Kendall Rank Correlation					Kendall Rank Correlation										Kendall Rank Correlation
Statistic	-8									Statistic	-9					Statistic	-1					Statistic	-1										Statistic	-9				Statistic	-9									Statistic	2
Mean	0									Mean	0					Mean	0					Mean	0										Mean	0				Mean	0									Mean	0
Variance	27.3333									Variance	26.3333					Variance	26.3333					Variance	26.3333										Variance	28.3333				Variance	26.3333									Variance	25.4667
Tau (corrected for ties)	-0.552052									Tau (corrected for ties)	-0.644503					Tau (corrected for ties)	-0.0716115					Tau (corrected for ties)	-0.0716115										Tau (corrected for ties)	-0.6				Tau (corrected for ties)	-0.644503									Tau (corrected for ties)	0.14825
Normal Approximation Method										Normal Approximation Method						Normal Approximation Method						Normal Approximation Method											Normal Approximation Method					Normal Approximation Method										Normal Approximation Method
Caution: the probabilities given are approximates for large N.										Caution: the probabilities given are approximates for large N.						Caution: the probabilities given are approximates for large N.						Caution: the probabilities given are approximates for large N.											Caution: the probabilities given are approximates for large N.					Caution: the probabilities given are approximates for large N.										Caution: the probabilities given are approximates for large N.
Z	-1.53018									Z	-1.75384					Z	-0.194871					Z	-0.194871										Z	-1.69081				Z	-1.75384									Z	0.396318
With Continuity Correction (for ABS(Z)<=2)										With Continuity Correction (for ABS(Z)<=2)						With Continuity Correction (for ABS(Z)<=2)						With Continuity Correction (for ABS(Z)<=2)											With Continuity Correction (for ABS(Z)<=2)					With Continuity Correction (for ABS(Z)<=2)										With Continuity Correction (for ABS(Z)<=2)
Upper Probability	0.948									Upper Probability	0.9679					Upper Probability	0.615					Upper Probability	0.615										Upper Probability	0.9628				Upper Probability	0.9679									Upper Probability	0.3831
Lower Probability	0.07571									Lower Probability	0.04882					Lower Probability	0.4612					Lower Probability	0.4612										Lower Probability	0.05515				Lower Probability	0.04882									Lower Probability	0.6898
Two-sided Probability	0.1514	Not Significant (P>0.05) (two-sided)								Two-sided Probability	0.09764	Not Significant (P>0.05) (two-sided)				Two-sided Probability	0.9224	Not Significant (P>0.05) (two-sided)				Two-sided Probability	0.9224	Not Significant (P>0.05) (two-sided)									Two-sided Probability	0.1103	Not Significant (P>0.05) (two-sided)			Two-sided Probability	0.09764	Not Significant (P>0.05) (two-sided)								Two-sided Probability	0.7663
Without Continuity Correction (for ABS(Z)>2)										Without Continuity Correction (for ABS(Z)>2)						Without Continuity Correction (for ABS(Z)>2)						Without Continuity Correction (for ABS(Z)>2)											Without Continuity Correction (for ABS(Z)>2)					Without Continuity Correction (for ABS(Z)>2)										Without Continuity Correction (for ABS(Z)>2)
Upper Probability	0.937									Upper Probability	0.9603					Upper Probability	0.5773					Upper Probability	0.5773										Upper Probability	0.9546				Upper Probability	0.9603									Upper Probability	0.3459
Lower Probability	0.06299									Lower Probability	0.03973					Lower Probability	0.4227					Lower Probability	0.4227										Lower Probability	0.04544				Lower Probability	0.03973									Lower Probability	0.6541
Two-sided Probability	0.126	Not Significant (P>0.05) (two-sided)								Two-sided Probability	0.07946	Not Significant (P>0.05) (two-sided)				Two-sided Probability	0.8455	Not Significant (P>0.05) (two-sided)				Two-sided Probability	0.8455	Not Significant (P>0.05) (two-sided)									Two-sided Probability	0.09087	Not Significant (P>0.05) (two-sided)			Two-sided Probability	0.07946	Not Significant (P>0.05) (two-sided)								Two-sided Probability	0.6919
Exact Method(Not corrected for ties)										Exact Method(Not corrected for ties)						Exact Method(Not corrected for ties)						Exact Method(Not corrected for ties)											Exact Method(Not corrected for ties)					Exact Method(Not corrected for ties)										Exact Method(Not corrected for ties)
Upper Probability	0.1361									Upper Probability	0.06806					Upper Probability	0.5					Upper Probability	0.5										Upper Probability	0.06806				Upper Probability	0.06806									Upper Probability	0.5
Lower Probability	0.8639									Lower Probability	0.9319					Lower Probability	0.5					Lower Probability	0.5										Lower Probability	0.9319				Lower Probability	0.9319									Lower Probability	0.5
Two-sided Probability	0.2722	Not Significant (P>0.05) (two-sided)								Two-sided Probability	0.1361	Not Significant (P>0.05) (two-sided)				Two-sided Probability	1	Not Significant (P>0.05) (two-sided)				Two-sided Probability	1	Not Significant (P>0.05) (two-sided)									Two-sided Probability	0.1361	Not Significant (P>0.05) (two-sided)			Two-sided Probability	0.1361	Not Significant (P>0.05) (two-sided)								Two-sided Probability	1
[truncated: 1 more columns]

## Sheet: Sheet7
T4 – competitive period (testing)
E4 - competitive period (training)
		Table 6	Correlation coefficient for the relationship between psychological tests and biochemical parameters at each testing moment in the specialized event of 100 m with the time in competition and the biochemical parameters of the basal testing (n= 6)
E4 - stage
T4-Test 1	T4 -test 2			T4- test 1	T4-test 3			T4-test 1	T4a-test 4			T4- test 1	T4b- test 4			T4	T4c-test 4			T4	TM-Cp.			T4	Limf-B			T4	Glu-B			T4	Norep-B			T4	Prol-B			T4	Cort-B
40	24			40	26			40	10			40	7			40	8			40	74.97			40	46.3			40	83			40	1.6			40	6.69			40	15.8
34	26			34	15			34	4			34	5			34	7			34	63.94			34	40.7			34	87			34	3.8			34	7.25			34	14.7
30	24			30	22			30	9			30	5			30	12			30	77.71			30	41			30	91			30	3.07			30	4.92			30	12.9
38	23			38	13			38	8			38	6			38	10			38	72.33			38	49.2			38	85			38	3.01			38	6.53			38	12
28	22			28	28			28	12			28	9			28	8			28	66.76			28	56.7			28	84			28	4.16			28	7.87			28	9.49
40	21			40	21			40	8			40	8			40	9			40	77.91			40	33.8			40	109			40	1.06			40	9.15			40	10.6
Nonparametric Correlation				Nonparametric Correlation				Nonparametric Correlation				Nonparametric Correlation				Nonparametric Correlation				Nonparametric Correlation				Nonparametric Correlation				Nonparametric Correlation				Nonparametric Correlation				Nonparametric Correlation				Nonparametric Correlation
Spearman Rank Correlation				Spearman Rank Correlation				Spearman Rank Correlation				Spearman Rank Correlation				Spearman Rank Correlation				Spearman Rank Correlation				Spearman Rank Correlation				Spearman Rank Correlation				Spearman Rank Correlation				Spearman Rank Correlation				Spearman Rank Correlation
Statistic	71.25			Statistic	68			Statistic	68.25			Statistic	75			Statistic	73.25			Statistic	82			Statistic	65.5			Statistic	74.5			Statistic	57.5			Statistic	76.5			Statistic	80
Mean	73.5			Mean	73.5			Mean	73.5			Mean	73.5			Mean	73.5			Mean	73.5			Mean	73.5			Mean	73.5			Mean	73.5			Mean	73.5			Mean	73.5
Variance	57.8			Variance	59.5			Variance	57.8			Variance	57.8			Variance	57.8			Variance	59.5			Variance	59.5			Variance	59.5			Variance	59.5			Variance	59.5			Variance	59.5
Rho (corrected for ties)	-0.132353			Rho (corrected for ties)	-0.318874			Rho (corrected for ties)	-0.308824			Rho (corrected for ties)	0.0882353			Rho (corrected for ties)	-0.0147059			Rho (corrected for ties)	0.492805			Rho (corrected for ties)	-0.463817			Rho (corrected for ties)	0.0579771			Rho (corrected for ties)	-0.927634			Rho (corrected for ties)	0.173931			Rho (corrected for ties)	0.376851
Exact Method				Exact Method				Exact Method				Exact Method				Exact Method				Exact Method				Exact Method				Exact Method				Exact Method				Exact Method				Exact Method
Upper Probability	0.9986			Upper Probability	0.9986			Upper Probability	0.9986			Upper Probability	0.9986			Upper Probability	0.9986			Upper Probability	0.9986			Upper Probability	0.9986			Upper Probability	0.9986			Upper Probability	0.9986			Upper Probability	0.9986			Upper Probability	0.9986
Lower Probability	0.001389			Lower Probability	0.001389			Lower Probability	0.001389			Lower Probability	0.001389			Lower Probability	0.001389			Lower Probability	0.001389			Lower Probability	0.001389			Lower Probability	0.001389			Lower Probability	0.001389			Lower Probability	0.001389			Lower Probability	0.001389
Two-sided Probability	0.002778	** (P<=0.01) (two-sided)		Two-sided Probability	0.002778	** (P<=0.01) (two-sided)		Two-sided Probability	0.002778	** (P<=0.01) (two-sided)		Two-sided Probability	0.002778	** (P<=0.01) (two-sided)		Two-sided Probability	0.002778	** (P<=0.01) (two-sided)		Two-sided Probability	0.002778	** (P<=0.01) (two-sided)		Two-sided Probability	0.002778	** (P<=0.01) (two-sided)		Two-sided Probability	0.002778	** (P<=0.01) (two-sided)		Two-sided Probability	0.002778	** (P<=0.01) (two-sided)		Two-sided Probability	0.002778	** (P<=0.01) (two-sided)		Two-sided Probability	0.002778	** (P<=0.01) (two-sided)
Kendall Rank Correlation				Kendall Rank Correlation				Kendall Rank Correlation				Kendall Rank Correlation				Kendall Rank Correlation				Kendall Rank Correlation				Kendall Rank Correlation				Kendall Rank Correlation				Kendall Rank Correlation				Kendall Rank Correlation				Kendall Rank Correlation
Statistic	-1			Statistic	-4			Statistic	-3			Statistic	3			Statistic	-1			Statistic	6			Statistic	-6			Statistic	0			Statistic	-12			Statistic	2			Statistic	4
Mean	0			Mean	0			Mean	0			Mean	0			Mean	0			Mean	0			Mean	0			Mean	0			Mean	0			Mean	0			Mean	0
Variance	26.4			Variance	27.3333			Variance	26.4			Variance	26.4			Variance	26.4			Variance	27.3333			Variance	27.3333			Variance	27.3333			Variance	27.3333			Variance	27.3333			Variance	27.3333
Tau (corrected for ties)	-0.0714286			Tau (corrected for ties)	-0.276026			Tau (corrected for ties)	-0.214286			Tau (corrected for ties)	0.214286			Tau (corrected for ties)	-0.0714286			Tau (corrected for ties)	0.414039			Tau (corrected for ties)	-0.414039			Tau (corrected for ties)	0			Tau (corrected for ties)	-0.828079			Tau (corrected for ties)	0.138013			Tau (corrected for ties)	0.276026
Normal Approximation Method				Normal Approximation Method				Normal Approximation Method				Normal Approximation Method				Normal Approximation Method				Normal Approximation Method				Normal Approximation Method				Normal Approximation Method				Normal Approximation Method				Normal Approximation Method				Normal Approximation Method
Caution: the probabilities given are approximates for large N.				Caution: the probabilities given are approximates for large N.				Caution: the probabilities given are approximates for large N.				Caution: the probabilities given are approximates for large N.				Caution: the probabilities given are approximates for large N.				Caution: the probabilities given are approximates for large N.				Caution: the probabilities given are approximates for large N.				Caution: the probabilities given are approximates for large N.				Caution: the probabilities given are approximates for large N.				Caution: the probabilities given are approximates for large N.				Caution: the probabilities given are approximates for large N.
Z	-0.194625			Z	-0.765092			Z	-0.583874			Z	0.583874			Z	-0.194625			Z	1.14764			Z	-1.14764			Z	0			Z	-2.29528			Z	0.382546			Z	0.765092
With Continuity Correction (for ABS(Z)<=2)				With Continuity Correction (for ABS(Z)<=2)				With Continuity Correction (for ABS(Z)<=2)				With Continuity Correction (for ABS(Z)<=2)				With Continuity Correction (for ABS(Z)<=2)				With Continuity Correction (for ABS(Z)<=2)				With Continuity Correction (for ABS(Z)<=2)				With Continuity Correction (for ABS(Z)<=2)				With Continuity Correction (for ABS(Z)<=2)				With Continuity Correction (for ABS(Z)<=2)				With Continuity Correction (for ABS(Z)<=2)
Upper Probability	0.6148			Upper Probability	0.8053			Upper Probability	0.7521			Upper Probability	0.3133			Upper Probability	0.6148			Upper Probability	0.1464			Upper Probability	0.8931			Upper Probability	0.5381			Upper Probability	0.9916			Upper Probability	0.3871			Upper Probability	0.2516
Lower Probability	0.4612			Lower Probability	0.2516			Lower Probability	0.3133			Lower Probability	0.7521			Lower Probability	0.4612			Lower Probability	0.8931			Lower Probability	0.1464			Lower Probability	0.5381			Lower Probability	0.01392			Lower Probability	0.6837			Lower Probability	0.8053
Two-sided Probability	0.9225	Not Significant (P>0.05) (two-sided)		Two-sided Probability	0.5032	Not Significant (P>0.05) (two-sided)		Two-sided Probability	0.6266	Not Significant (P>0.05) (two-sided)		Two-sided Probability	0.6266	Not Significant (P>0.05) (two-sided)		Two-sided Probability	0.9225	Not Significant (P>0.05) (two-sided)		Two-sided Probability	0.2928	Not Significant (P>0.05) (two-sided)		Two-sided Probability	0.2928	Not Significant (P>0.05) (two-sided)		Two-sided Probability	1	Not Significant (P>0.05) (two-sided)		Two-sided Probability	0.02783	* (P<=0.05) (two-sided)		Two-sided Probability	0.7742	Not Significant (P>0.05) (two-sided)		Two-sided Probability	0.5032	Not Significant (P>0.05) (two-sided)
Without Continuity Correction (for ABS(Z)>2)				Without Continuity Correction (for ABS(Z)>2)				Without Continuity Correction (for ABS(Z)>2)				Without Continuity Correction (for ABS(Z)>2)				Without Continuity Correction (for ABS(Z)>2)				Without Continuity Correction (for ABS(Z)>2)				Without Continuity Correction (for ABS(Z)>2)				Without Continuity Correction (for ABS(Z)>2)				Without Continuity Correction (for ABS(Z)>2)				Without Continuity Correction (for ABS(Z)>2)				Without Continuity Correction (for ABS(Z)>2)
Upper Probability	0.5772			Upper Probability	0.7779			Upper Probability	0.7203			Upper Probability	0.2797			Upper Probability	0.5772			Upper Probability	0.1256			Upper Probability	0.8744			Upper Probability	0.5			Upper Probability	0.9891			Upper Probability	0.351			Upper Probability	0.2221
Lower Probability	0.4228			Lower Probability	0.2221			Lower Probability	0.2797			Lower Probability	0.7203			Lower Probability	0.4228			Lower Probability	0.8744			Lower Probability	0.1256			Lower Probability	0.5			Lower Probability	0.01086			Lower Probability	0.649			Lower Probability	0.7779
Two-sided Probability	0.8457	Not Significant (P>0.05) (two-sided)		Two-sided Probability	0.4442	Not Significant (P>0.05) (two-sided)		Two-sided Probability	0.5593	Not Significant (P>0.05) (two-sided)		Two-sided Probability	0.5593	Not Significant (P>0.05) (two-sided)		Two-sided Probability	0.8457	Not Significant (P>0.05) (two-sided)		Two-sided Probability	0.2511	Not Significant (P>0.05) (two-sided)		Two-sided Probability	0.2511	Not Significant (P>0.05) (two-sided)		Two-sided Probability	1	Not Significant (P>0.05) (two-sided)		Two-sided Probability	0.02172	* (P<=0.05) (two-sided)		Two-sided Probability	0.7021	Not Significant (P>0.05) (two-sided)		Two-sided Probability	0.4442	Not Significant (P>0.05) (two-sided)
Exact Method(Not corrected for ties)				Exact Method(Not corrected for ties)				Exact Method(Not corrected for ties)				Exact Method(Not corrected for ties)				Exact Method(Not corrected for ties)				Exact Method(Not corrected for ties)				Exact Method(Not corrected for ties)				Exact Method(Not corrected for ties)				Exact Method(Not corrected for ties)				Exact Method(Not corrected for ties)				Exact Method(Not corrected for ties)
Upper Probability	0.5			Upper Probability	0.3597			Upper Probability	0.3597			Upper Probability	0.3597			Upper Probability	0.5			Upper Probability	0.2347			Upper Probability	0.2347			Upper Probability	0.6403			Upper Probability	0.02778			Upper Probability	0.5			Upper Probability	0.3597
Lower Probability	0.5			Lower Probability	0.6403			Lower Probability	0.6403			Lower Probability	0.6403			Lower Probability	0.5			Lower Probability	0.7653			Lower Probability	0.7653			Lower Probability	0.3597			Lower Probability	0.9722			Lower Probability	0.5			Lower Probability	0.6403
Two-sided Probability	1	Not Significant (P>0.05) (two-sided)		Two-sided Probability	0.7194	Not Significant (P>0.05) (two-sided)		Two-sided Probability	0.7194	Not Significant (P>0.05) (two-sided)		Two-sided Probability	0.7194	Not Significant (P>0.05) (two-sided)		Two-sided Probability	1	Not Significant (P>0.05) (two-sided)		Two-sided Probability	0.4694	Not Significant (P>0.05) (two-sided)		Two-sided Probability	0.4694	Not Significant (P>0.05) (two-sided)		Two-sided Probability	0.7194	Not Significant (P>0.05) (two-sided)		Two-sided Probability	0.05556	Not Significant (P>0.05) (two-sided)		Two-sided Probability	1	Not Significant (P>0.05) (two-sided)		Two-sided Probability	0.7194	Not Significant (P>0.05) (two-sided)
T4- test 2	T4-test 3			T4- test 2	T4a-test 4			T4- test 2	T4b- test 4			T4- test 2	T4c-test 4			T4- test 2	TM-Cp.			T4- test 2	Limf-B			T4- test 2	Glu-B			T4- test 2	Norep-B			T4- test 2	Prol-B			T4- test 2	Cort-B
24	26			24	10			24	7			24	8			24	74.97			24	46.3			24	83			24	1.6			24	6.69			24	15.8
26	15			26	4			26	5			26	7			26	63.94			26	40.7			26	87			26	3.8			26	7.25			26	14.7
24	22			24	9			24	5			24	12			24	77.71			24	41			24	91			24	3.07			24	4.92			24	12.9
23	13			23	8			23	6			23	10			23	72.33			23	49.2			23	85			23	3.01			23	6.53			23	12
22	28			22	12			22	9			22	8			22	66.76			22	56.7			22	84			22	4.16			22	7.87			22	9.49
21	21			21	8			21	8			21	9			21	77.91			21	33.8			21	109			21	1.06			21	9.15			21	10.6
Nonparametric Correlation				Nonparametric Correlation				Nonparametric Correlation				Nonparametric Correlation				Nonparametric Correlation				Nonparametric Correlation				Nonparametric Correlation				Nonparametric Correlation				Nonparametric Correlation				Nonparametric Correlation
Spearman Rank Correlation				Spearman Rank Correlation				Spearman Rank Correlation				Spearman Rank Correlation				Spearman Rank Correlation				Spearman Rank Correlation				Spearman Rank Correlation				Spearman Rank Correlation				Spearman Rank Correlation				Spearman Rank Correlation
Statistic	70.5			Statistic	68.5			Statistic	59.75			Statistic	68.25			Statistic	65.5			Statistic	71.5			Statistic	70			Statistic	79			Statistic	64			Statistic	88
Mean	73.5			Mean	73.5			Mean	73.5			Mean	73.5			Mean	73.5			Mean	73.5			Mean	73.5			Mean	73.5			Mean	73.5			Mean	73.5
Variance	59.5			Variance	57.8			Variance	57.8			Variance	57.8			Variance	59.5			Variance	59.5			Variance	59.5			Variance	59.5			Variance	59.5			Variance	59.5
Rho (corrected for ties)	-0.173931			Rho (corrected for ties)	-0.294118			Rho (corrected for ties)	-0.808824			Rho (corrected for ties)	-0.308824			Rho (corrected for ties)	-0.463817			Rho (corrected for ties)	-0.115954			Rho (corrected for ties)	-0.20292			Rho (corrected for ties)	0.318874			Rho (corrected for ties)	-0.550782			Rho (corrected for ties)	0.840668
Exact Method				Exact Method				Exact Method				Exact Method				Exact Method				Exact Method				Exact Method				Exact Method				Exact Method				Exact Method
Upper Probability	0.9986			Upper Probability	0.9986			Upper Probability	0.9986			Upper Probability	0.9986			Upper Probability	0.9986			Upper Probability	0.9986			Upper Probability	0.9986			Upper Probability	0.9986			Upper Probability	0.9986			Upper Probability	0.9986
Lower Probability	0.001389			Lower Probability	0.001389			Lower Probability	0.001389			Lower Probability	0.001389			Lower Probability	0.001389			Lower Probability	0.001389			Lower Probability	0.001389			Lower Probability	0.001389			Lower Probability	0.001389			Lower Probability	0.001389
Two-sided Probability	0.002778	** (P<=0.01) (two-sided)		Two-sided Probability	0.002778	** (P<=0.01) (two-sided)		Two-sided Probability	0.002778	** (P<=0.01) (two-sided)		Two-sided Probability	0.002778	** (P<=0.01) (two-sided)		Two-sided Probability	0.002778	** (P<=0.01) (two-sided)		Two-sided Probability	0.002778	** (P<=0.01) (two-sided)		Two-sided Probability	0.002778	** (P<=0.01) (two-sided)		Two-sided Probability	0.002778	** (P<=0.01) (two-sided)		Two-sided Probability	0.002778	** (P<=0.01) (two-sided)		Two-sided Probability	0.002778	** (P<=0.01) (two-sided)
Kendall Rank Correlation				Kendall Rank Correlation				Kendall Rank Correlation				Kendall Rank Correlation				Kendall Rank Correlation				Kendall Rank Correlation				Kendall Rank Correlation				Kendall Rank Correlation				Kendall Rank Correlation				Kendall Rank Correlation
Statistic	-2			Statistic	-3			Statistic	-9			Statistic	-3			Statistic	-4			Statistic	-4			Statistic	-2			Statistic	4			Statistic	-6			Statistic	10
Mean	0			Mean	0			Mean	0			Mean	0			Mean	0			Mean	0			Mean	0			Mean	0			Mean	0			Mean	0
Variance	27.3333			Variance	26.4			Variance	26.4			Variance	26.4			Variance	27.3333			Variance	27.3333			Variance	27.3333			Variance	27.3333			Variance	27.3333			Variance	27.3333
Tau (corrected for ties)	-0.138013			Tau (corrected for ties)	-0.214286			Tau (corrected for ties)	-0.642857			Tau (corrected for ties)	-0.214286			Tau (corrected for ties)	-0.276026			Tau (corrected for ties)	-0.276026			Tau (corrected for ties)	-0.138013			Tau (corrected for ties)	0.276026			Tau (corrected for ties)	-0.414039			Tau (corrected for ties)	0.690066
Normal Approximation Method				Normal Approximation Method				Normal Approximation Method				Normal Approximation Method				Normal Approximation Method				Normal Approximation Method				Normal Approximation Method				Normal Approximation Method				Normal Approximation Method				Normal Approximation Method
Caution: the probabilities given are approximates for large N.				Caution: the probabilities given are approximates for large N.				Caution: the probabilities given are approximates for large N.				Caution: the probabilities given are approximates for large N.				Caution: the probabilities given are approximates for large N.				Caution: the probabilities given are approximates for large N.				Caution: the probabilities given are approximates for large N.				Caution: the probabilities given are approximates for large N.				Caution: the probabilities given are approximates for large N.				Caution: the probabilities given are approximates for large N.
Z	-0.382546			Z	-0.583874			Z	-1.75162			Z	-0.583874			Z	-0.765092			Z	-0.765092			Z	-0.382546			Z	0.765092			Z	-1.14764			Z	1.91273
With Continuity Correction (for ABS(Z)<=2)				With Continuity Correction (for ABS(Z)<=2)				With Continuity Correction (for ABS(Z)<=2)				With Continuity Correction (for ABS(Z)<=2)				With Continuity Correction (for ABS(Z)<=2)				With Continuity Correction (for ABS(Z)<=2)				With Continuity Correction (for ABS(Z)<=2)				With Continuity Correction (for ABS(Z)<=2)				With Continuity Correction (for ABS(Z)<=2)				With Continuity Correction (for ABS(Z)<=2)
Upper Probability	0.6837			Upper Probability	0.7521			Upper Probability	0.9678			Upper Probability	0.7521			Upper Probability	0.8053			Upper Probability	0.8053			Upper Probability	0.6837			Upper Probability	0.2516			Upper Probability	0.8931			Upper Probability	0.0346
Lower Probability	0.3871			Lower Probability	0.3133			Lower Probability	0.04903			Lower Probability	0.3133			Lower Probability	0.2516			Lower Probability	0.2516			Lower Probability	0.3871			Lower Probability	0.8053			Lower Probability	0.1464			Lower Probability	0.9777
Two-sided Probability	0.7742	Not Significant (P>0.05) (two-sided)		Two-sided Probability	0.6266	Not Significant (P>0.05) (two-sided)		Two-sided Probability	0.09806	Not Significant (P>0.05) (two-sided)		Two-sided Probability	0.6266	Not Significant (P>0.05) (two-sided)		Two-sided Probability	0.5032	Not Significant (P>0.05) (two-sided)		Two-sided Probability	0.5032	Not Significant (P>0.05) (two-sided)		Two-sided Probability	0.7742	Not Significant (P>0.05) (two-sided)		Two-sided Probability	0.5032	Not Significant (P>0.05) (two-sided)		Two-sided Probability	0.2928	Not Significant (P>0.05) (two-sided)		Two-sided Probability	0.0692	Not Significant (P>0.05) (two-sided)
Without Continuity Correction (for ABS(Z)>2)				Without Continuity Correction (for ABS(Z)>2)				Without Continuity Correction (for ABS(Z)>2)				Without Continuity Correction (for ABS(Z)>2)				Without Continuity Correction (for ABS(Z)>2)				Without Continuity Correction (for ABS(Z)>2)				Without Continuity Correction (for ABS(Z)>2)				Without Continuity Correction (for ABS(Z)>2)				Without Continuity Correction (for ABS(Z)>2)				Without Continuity Correction (for ABS(Z)>2)
Upper Probability	0.649			Upper Probability	0.7203			Upper Probability	0.9601			Upper Probability	0.7203			Upper Probability	0.7779			Upper Probability	0.7779			Upper Probability	0.649			Upper Probability	0.2221			Upper Probability	0.8744			Upper Probability	0.02789
Lower Probability	0.351			Lower Probability	0.2797			Lower Probability	0.03992			Lower Probability	0.2797			Lower Probability	0.2221			Lower Probability	0.2221			Lower Probability	0.351			Lower Probability	0.7779			Lower Probability	0.1256			Lower Probability	0.9721
Two-sided Probability	0.7021	Not Significant (P>0.05) (two-sided)		Two-sided Probability	0.5593	Not Significant (P>0.05) (two-sided)		Two-sided Probability	0.07984	Not Significant (P>0.05) (two-sided)		Two-sided Probability	0.5593	Not Significant (P>0.05) (two-sided)		Two-sided Probability	0.4442	Not Significant (P>0.05) (two-sided)		Two-sided Probability	0.4442	Not Significant (P>0.05) (two-sided)		Two-sided Probability	0.7021	Not Significant (P>0.05) (two-sided)		Two-sided Probability	0.4442	Not Significant (P>0.05) (two-sided)		Two-sided Probability	0.2511	Not Significant (P>0.05) (two-sided)		Two-sided Probability	0.05578	Not Significant (P>0.05) (two-sided)
Exact Method(Not corrected for ties)				Exact Method(Not corrected for ties)				Exact Method(Not corrected for ties)				Exact Method(Not corrected for ties)				Exact Method(Not corrected for ties)				Exact Method(Not corrected for ties)				Exact Method(Not corrected for ties)				Exact Method(Not corrected for ties)				Exact Method(Not corrected for ties)				Exact Method(Not corrected for ties)
Upper Probability	0.5			Upper Probability	0.3597			Upper Probability	0.06806			Upper Probability	0.3597			Upper Probability	0.3597			Upper Probability	0.3597			Upper Probability	0.5			Upper Probability	0.3597			Upper Probability	0.2347			Upper Probability	0.06806
Lower Probability	0.5			Lower Probability	0.6403			Lower Probability	0.9319			Lower Probability	0.6403			Lower Probability	0.6403			Lower Probability	0.6403			Lower Probability	0.5			Lower Probability	0.6403			Lower Probability	0.7653			Lower Probability	0.9319
Two-sided Probability	1	Not Significant (P>0.05) (two-sided)		Two-sided Probability	0.7194	Not Significant (P>0.05) (two-sided)		Two-sided Probability	0.1361	Not Significant (P>0.05) (two-sided)		Two-sided Probability	0.7194	Not Significant (P>0.05) (two-sided)		Two-sided Probability	0.7194	Not Significant (P>0.05) (two-sided)		Two-sided Probability	0.7194	Not Significant (P>0.05) (two-sided)		Two-sided Probability	1	Not Significant (P>0.05) (two-sided)		Two-sided Probability	0.7194	Not Significant (P>0.05) (two-sided)		Two-sided Probability	0.4694	Not Significant (P>0.05) (two-sided)		Two-sided Probability	0.1361	Not Significant (P>0.05) (two-sided)
T4-test 3	T4a-test 4			T4-test 3	T4b- test 4			T4-test 3	T4c-test 4			T4-test 3	TM-Cp.			T4-test 3	Limf-B			T4-test 3	Glu-B			T4-test 3	Norep-B			T4-test 3	Prol-B			T4-test 3	Cort-B
26	10			26	7			26	8			26	74.97			26	46.3			26	83			26	1.6			26	6.69			26	15.8
15	4			15	5			15	7			15	63.94			15	40.7			15	87			15	3.8			15	7.25			15	14.7
22	9			22	5			22	12			22	77.71			22	41			22	91			22	3.07			22	4.92			22	12.9
13	8			13	6			13	10			13	72.33			13	49.2			13	85			13	3.01			13	6.53			13	12
28	12			28	9			28	8			28	66.76			28	56.7			28	84			28	4.16			28	7.87			28	9.49
21	8			21	8			21	9			21	77.91			21	33.8			21	109			21	1.06			21	9.15			21	10.6
Nonparametric Correlation				Nonparametric Correlation				Nonparametric Correlation				Nonparametric Correlation				Nonparametric Correlation				Nonparametric Correlation				Nonparametric Correlation				Nonparametric Correlation				Nonparametric Correlation
Spearman Rank Correlation				Spearman Rank Correlation				Spearman Rank Correlation				Spearman Rank Correlation				Spearman Rank Correlation				Spearman Rank Correlation				Spearman Rank Correlation				Spearman Rank Correlation				Spearman Rank Correlation
Statistic	89			Statistic	83			Statistic	70.5			Statistic	75			Statistic	80			Statistic	66			Statistic	78			Statistic	77			Statistic	71
Mean	73.5			Mean	73.5			Mean	73.5			Mean	73.5			Mean	73.5			Mean	73.5			Mean	73.5			Mean	73.5			Mean	73.5
Variance	59.5			Variance	59.5			Variance	59.5			Variance	61.25			Variance	61.25			Variance	61.25			Variance	61.25			Variance	61.25			Variance	61.25
Rho (corrected for ties)	0.898645			Rho (corrected for ties)	0.550782			Rho (corrected for ties)	-0.173931			Rho (corrected for ties)	0.0857143			Rho (corrected for ties)	0.371429			Rho (corrected for ties)	-0.428571			Rho (corrected for ties)	0.257143			Rho (corrected for ties)	0.2			Rho (corrected for ties)	-0.142857
Exact Method				Exact Method				Exact Method				Exact Method				Exact Method				Exact Method				Exact Method				Exact Method				Exact Method
Upper Probability	0.9986			Upper Probability	0.9986			Upper Probability	0.9986			Upper Probability	0.9986			Upper Probability	0.9986			Upper Probability	0.9986			Upper Probability	0.9986			Upper Probability	0.9986			Upper Probability	0.9986
Lower Probability	0.001389			Lower Probability	0.001389			Lower Probability	0.001389			Lower Probability	0.001389			Lower Probability	0.001389			Lower Probability	0.001389			Lower Probability	0.001389			Lower Probability	0.001389			Lower Probability	0.001389
Two-sided Probability	0.002778	** (P<=0.01) (two-sided)		Two-sided Probability	0.002778	** (P<=0.01) (two-sided)		Two-sided Probability	0.002778	** (P<=0.01) (two-sided)		Two-sided Probability	0.002778	** (P<=0.01) (two-sided)		Two-sided Probability	0.002778	** (P<=0.01) (two-sided)		Two-sided Probability	0.002778	** (P<=0.01) (two-sided)		Two-sided Probability	0.002778	** (P<=0.01) (two-sided)		Two-sided Probability	0.002778	** (P<=0.01) (two-sided)		Two-sided Probability	0.002778	** (P<=0.01) (two-sided)
Kendall Rank Correlation				Kendall Rank Correlation				Kendall Rank Correlation				Kendall Rank Correlation				Kendall Rank Correlation				Kendall Rank Correlation				Kendall Rank Correlation				Kendall Rank Correlation				Kendall Rank Correlation
Statistic	12			Statistic	6			Statistic	-2			Statistic	-1			Statistic	5			Statistic	-3			Statistic	3			Statistic	3			Statistic	-1
Mean	0			Mean	0			Mean	0			Mean	0			Mean	0			Mean	0			Mean	0			Mean	0			Mean	0
Variance	27.3333			Variance	27.3333			Variance	27.3333			Variance	28.3333			Variance	28.3333			Variance	28.3333			Variance	28.3333			Variance	28.3333			Variance	28.3333
Tau (corrected for ties)	0.828079			Tau (corrected for ties)	0.414039			Tau (corrected for ties)	-0.138013			Tau (corrected for ties)	-0.0666667			Tau (corrected for ties)	0.333333			Tau (corrected for ties)	-0.2			Tau (corrected for ties)	0.2			Tau (corrected for ties)	0.2			Tau (corrected for ties)	-0.0666667
Normal Approximation Method				Normal Approximation Method				Normal Approximation Method				Normal Approximation Method				Normal Approximation Method				Normal Approximation Method				Normal Approximation Method				Normal Approximation Method				Normal Approximation Method
Caution: the probabilities given are approximates for large N.				Caution: the probabilities given are approximates for large N.				Caution: the probabilities given are approximates for large N.				Caution: the probabilities given are approximates for large N.				Caution: the probabilities given are approximates for large N.				Caution: the probabilities given are approximates for large N.				Caution: the probabilities given are approximates for large N.				Caution: the probabilities given are approximates for large N.				Caution: the probabilities given are approximates for large N.
Z	2.29528			Z	1.14764			Z	-0.382546			Z	-0.187867			Z	0.939336			Z	-0.563602			Z	0.563602			Z	0.563602			Z	-0.187867
With Continuity Correction (for ABS(Z)<=2)				With Continuity Correction (for ABS(Z)<=2)				With Continuity Correction (for ABS(Z)<=2)				With Continuity Correction (for ABS(Z)<=2)				With Continuity Correction (for ABS(Z)<=2)				With Continuity Correction (for ABS(Z)<=2)				With Continuity Correction (for ABS(Z)<=2)				With Continuity Correction (for ABS(Z)<=2)				With Continuity Correction (for ABS(Z)<=2)
Upper Probability	0.01392			Upper Probability	0.1464			Upper Probability	0.6837			Upper Probability	0.611			Upper Probability	0.1989			Upper Probability	0.7446			Upper Probability	0.3193			Upper Probability	0.3193			Upper Probability	0.611
Lower Probability	0.9916			Lower Probability	0.8931			Lower Probability	0.3871			Lower Probability	0.4626			Lower Probability	0.8493			Lower Probability	0.3193			Lower Probability	0.7446			Lower Probability	0.7446			Lower Probability	0.4626
Two-sided Probability	0.02783	* (P<=0.05) (two-sided)		Two-sided Probability	0.2928	Not Significant (P>0.05) (two-sided)		Two-sided Probability	0.7742	Not Significant (P>0.05) (two-sided)		Two-sided Probability	0.9252	Not Significant (P>0.05) (two-sided)		Two-sided Probability	0.3979	Not Significant (P>0.05) (two-sided)		Two-sided Probability	0.6386	Not Significant (P>0.05) (two-sided)		Two-sided Probability	0.6386	Not Significant (P>0.05) (two-sided)		Two-sided Probability	0.6386	Not Significant (P>0.05) (two-sided)		Two-sided Probability	0.9252	Not Significant (P>0.05) (two-sided)
Without Continuity Correction (for ABS(Z)>2)				Without Continuity Correction (for ABS(Z)>2)				Without Continuity Correction (for ABS(Z)>2)				Without Continuity Correction (for ABS(Z)>2)				Without Continuity Correction (for ABS(Z)>2)				Without Continuity Correction (for ABS(Z)>2)				Without Continuity Correction (for ABS(Z)>2)				Without Continuity Correction (for ABS(Z)>2)				Without Continuity Correction (for ABS(Z)>2)
Upper Probability	0.01086			Upper Probability	0.1256			Upper Probability	0.649			Upper Probability	0.5745			Upper Probability	0.1738			Upper Probability	0.7135			Upper Probability	0.2865			Upper Probability	0.2865			Upper Probability	0.5745
Lower Probability	0.9891			Lower Probability	0.8744			Lower Probability	0.351			Lower Probability	0.4255			Lower Probability	0.8262			Lower Probability	0.2865			Lower Probability	0.7135			Lower Probability	0.7135			Lower Probability	0.4255
Two-sided Probability	0.02172	* (P<=0.05) (two-sided)		Two-sided Probability	0.2511	Not Significant (P>0.05) (two-sided)		Two-sided Probability	0.7021	Not Significant (P>0.05) (two-sided)		Two-sided Probability	0.851	Not Significant (P>0.05) (two-sided)		Two-sided Probability	0.3476	Not Significant (P>0.05) (two-sided)		Two-sided Probability	0.573	Not Significant (P>0.05) (two-sided)		Two-sided Probability	0.573	Not Significant (P>0.05) (two-sided)		Two-sided Probability	0.573	Not Significant (P>0.05) (two-sided)		Two-sided Probability	0.851	Not Significant (P>0.05) (two-sided)
Exact Method(Not corrected for ties)				Exact Method(Not corrected for ties)				Exact Method(Not corrected for ties)				Exact Method(Not corrected for ties)				Exact Method(Not corrected for ties)				Exact Method(Not corrected for ties)				Exact Method(Not corrected for ties)				Exact Method(Not corrected for ties)				Exact Method(Not corrected for ties)
Upper Probability	0.02778			Upper Probability	0.2347			Upper Probability	0.5			Upper Probability	0.5			Upper Probability	0.2347			Upper Probability	0.3597			Upper Probability	0.3597			Upper Probability	0.3597			Upper Probability	0.5
Lower Probability	0.9722			Lower Probability	0.7653			Lower Probability	0.5			Lower Probability	0.5			Lower Probability	0.7653			Lower Probability	0.6403			Lower Probability	0.6403			Lower Probability	0.6403			Lower Probability	0.5
Two-sided Probability	0.05556	Not Significant (P>0.05) (two-sided)		Two-sided Probability	0.4694	Not Significant (P>0.05) (two-sided)		Two-sided Probability	1	Not Significant (P>0.05) (two-sided)		Two-sided Probability	1	Not Significant (P>0.05) (two-sided)		Two-sided Probability	0.4694	Not Significant (P>0.05) (two-sided)		Two-sided Probability	0.7194	Not Significant (P>0.05) (two-sided)		Two-sided Probability	0.7194	Not Significant (P>0.05) (two-sided)		Two-sided Probability	0.7194	Not Significant (P>0.05) (two-sided)		Two-sided Probability	1	Not Significant (P>0.05) (two-sided)
T4a-test 4Sc	T4b- test 4			T4a-test 4Sc	T4c-test 4			T4a-test 4Sc	TM-Cp.			T4a-test 4Sc	Limf-B			T4a-test 4Sc	Glu-B			T4a-test 4Sc	Norep-B			T4a-test 4Sc	Prol-B			T4a-test 4Sc	Cort-B
10	7			10	8			10	74.97			10	46.3			10	83			10	1.6			10	6.69			10	15.8
4	5			4	7			4	63.94			4	40.7			4	87			4	3.8			4	7.25			4	14.7
9	5			9	12			9	77.71			9	41			9	91			9	3.07			9	4.92			9	12.9
8	6			8	10			8	72.33			8	49.2			8	85			8	3.01			8	6.53			8	12
12	9			12	8			12	66.76			12	56.7			12	84			12	4.16			12	7.87			12	9.49
8	8			8	9			8	77.91			8	33.8			8	109			8	1.06			8	9.15			8	10.6
Nonparametric Correlation				Nonparametric Correlation				Nonparametric Correlation				Nonparametric Correlation				Nonparametric Correlation				Nonparametric Correlation				Nonparametric Correlation				Nonparametric Correlation
Spearman Rank Correlation				Spearman Rank Correlation				Spearman Rank Correlation				Spearman Rank Correlation				Spearman Rank Correlation				Spearman Rank Correlation				Spearman Rank Correlation				Spearman Rank Correlation
Statistic	83.5			Statistic	75			Statistic	75.5			Statistic	85			Statistic	63.5			Statistic	77			Statistic	73			Statistic	69.5
Mean	73.5			Mean	73.5			Mean	73.5			Mean	73.5			Mean	73.5			Mean	73.5			Mean	73.5			Mean	73.5
Variance	57.8			Variance	57.8			Variance	59.5			Variance	59.5			Variance	59.5			Variance	59.5			Variance	59.5			Variance	59.5
Rho (corrected for ties)	0.588235			Rho (corrected for ties)	0.0882353			Rho (corrected for ties)	0.115954			Rho (corrected for ties)	0.666737			Rho (corrected for ties)	-0.579771			Rho (corrected for ties)	0.20292			Rho (corrected for ties)	-0.0289886			Rho (corrected for ties)	-0.231908
Exact Method				Exact Method				Exact Method				Exact Method				Exact Method				Exact Method				Exact Method				Exact Method
Upper Probability	0.9986			Upper Probability	0.9986			Upper Probability	0.9986			Upper Probability	0.9986			Upper Probability	0.9986			Upper Probability	0.9986			Upper Probability	0.9986			Upper Probability	0.9986
Lower Probability	0.001389			Lower Probability	0.001389			Lower Probability	0.001389			Lower Probability	0.001389			Lower Probability	0.001389			Lower Probability	0.001389			Lower Probability	0.001389			Lower Probability	0.001389
Two-sided Probability	0.002778	** (P<=0.01) (two-sided)		Two-sided Probability	0.002778	** (P<=0.01) (two-sided)		Two-sided Probability	0.002778	** (P<=0.01) (two-sided)		Two-sided Probability	0.002778	** (P<=0.01) (two-sided)		Two-sided Probability	0.002778	** (P<=0.01) (two-sided)		Two-sided Probability	0.002778	** (P<=0.01) (two-sided)		Two-sided Probability	0.002778	** (P<=0.01) (two-sided)		Two-sided Probability	0.002778	** (P<=0.01) (two-sided)
Kendall Rank Correlation				Kendall Rank Correlation				Kendall Rank Correlation				Kendall Rank Correlation				Kendall Rank Correlation				Kendall Rank Correlation				Kendall Rank Correlation				Kendall Rank Correlation
Statistic	7			Statistic	1			Statistic	0			Statistic	8			Statistic	-6			Statistic	2			Statistic	0			Statistic	-2
Mean	0			Mean	0			Mean	0			Mean	0			Mean	0			Mean	0			Mean	0			Mean	0
Variance	26.4			Variance	26.4			Variance	27.3333			Variance	27.3333			Variance	27.3333			Variance	27.3333			Variance	27.3333			Variance	27.3333
Tau (corrected for ties)	0.5			Tau (corrected for ties)	0.0714286			Tau (corrected for ties)	0			Tau (corrected for ties)	0.552052			Tau (corrected for ties)	-0.414039			Tau (corrected for ties)	0.138013			Tau (corrected for ties)	0			Tau (corrected for ties)	-0.138013
Normal Approximation Method				Normal Approximation Method				Normal Approximation Method				Normal Approximation Method				Normal Approximation Method				Normal Approximation Method				Normal Approximation Method				Normal Approximation Method
Caution: the probabilities given are approximates for large N.				Caution: the probabilities given are approximates for large N.				Caution: the probabilities given are approximates for large N.				Caution: the probabilities given are approximates for large N.				Caution: the probabilities given are approximates for large N.				Caution: the probabilities given are approximates for large N.				Caution: the probabilities given are approximates for large N.				Caution: the probabilities given are approximates for large N.
Z	1.36237			Z	0.194625			Z	0			Z	1.53018			Z	-1.14764			Z	0.382546			Z	0			Z	-0.382546
With Continuity Correction (for ABS(Z)<=2)				With Continuity Correction (for ABS(Z)<=2)				With Continuity Correction (for ABS(Z)<=2)				With Continuity Correction (for ABS(Z)<=2)				With Continuity Correction (for ABS(Z)<=2)				With Continuity Correction (for ABS(Z)<=2)				With Continuity Correction (for ABS(Z)<=2)				With Continuity Correction (for ABS(Z)<=2)
Upper Probability	0.1029			Upper Probability	0.4612			Upper Probability	0.5381			Upper Probability	0.07571			Upper Probability	0.8931			Upper Probability	0.3871			Upper Probability	0.5381			Upper Probability	0.6837
Lower Probability	0.9278			Lower Probability	0.6148			Lower Probability	0.5381			Lower Probability	0.948			Lower Probability	0.1464			Lower Probability	0.6837			Lower Probability	0.5381			Lower Probability	0.3871
Two-sided Probability	0.2058	Not Significant (P>0.05) (two-sided)		Two-sided Probability	0.9225	Not Significant (P>0.05) (two-sided)		Two-sided Probability	1	Not Significant (P>0.05) (two-sided)		Two-sided Probability	0.1514	Not Significant (P>0.05) (two-sided)		Two-sided Probability	0.2928	Not Significant (P>0.05) (two-sided)		Two-sided Probability	0.7742	Not Significant (P>0.05) (two-sided)		Two-sided Probability	1	Not Significant (P>0.05) (two-sided)		Two-sided Probability	0.7742	Not Significant (P>0.05) (two-sided)
Without Continuity Correction (for ABS(Z)>2)				Without Continuity Correction (for ABS(Z)>2)				Without Continuity Correction (for ABS(Z)>2)				Without Continuity Correction (for ABS(Z)>2)				Without Continuity Correction (for ABS(Z)>2)				Without Continuity Correction (for ABS(Z)>2)				Without Continuity Correction (for ABS(Z)>2)				Without Continuity Correction (for ABS(Z)>2)
Upper Probability	0.08654			Upper Probability	0.4228			Upper Probability	0.5			Upper Probability	0.06299			Upper Probability	0.8744			Upper Probability	0.351			Upper Probability	0.5			Upper Probability	0.649
Lower Probability	0.9135			Lower Probability	0.5772			Lower Probability	0.5			Lower Probability	0.937			Lower Probability	0.1256			Lower Probability	0.649			Lower Probability	0.5			Lower Probability	0.351
Two-sided Probability	0.1731	Not Significant (P>0.05) (two-sided)		Two-sided Probability	0.8457	Not Significant (P>0.05) (two-sided)		Two-sided Probability	1	Not Significant (P>0.05) (two-sided)		Two-sided Probability	0.126	Not Significant (P>0.05) (two-sided)		Two-sided Probability	0.2511	Not Significant (P>0.05) (two-sided)		Two-sided Probability	0.7021	Not Significant (P>0.05) (two-sided)		Two-sided Probability	1	Not Significant (P>0.05) (two-sided)		Two-sided Probability	0.7021	Not Significant (P>0.05) (two-sided)
Exact Method(Not corrected for ties)				Exact Method(Not corrected for ties)				Exact Method(Not corrected for ties)				Exact Method(Not corrected for ties)				Exact Method(Not corrected for ties)				Exact Method(Not corrected for ties)				Exact Method(Not corrected for ties)				Exact Method(Not corrected for ties)
Upper Probability	0.1361			Upper Probability	0.5			Upper Probability	0.6403			Upper Probability	0.1361			Upper Probability	0.2347			Upper Probability	0.5			Upper Probability	0.6403			Upper Probability	0.5
Lower Probability	0.8639			Lower Probability	0.5			Lower Probability	0.3597			Lower Probability	0.8639			Lower Probability	0.7653			Lower Probability	0.5			Lower Probability	0.3597			Lower Probability	0.5
Two-sided Probability	0.2722	Not Significant (P>0.05) (two-sided)		Two-sided Probability	1	Not Significant (P>0.05) (two-sided)		Two-sided Probability	0.7194	Not Significant (P>0.05) (two-sided)		Two-sided Probability	0.2722	Not Significant (P>0.05) (two-sided)		Two-sided Probability	0.4694	Not Significant (P>0.05) (two-sided)		Two-sided Probability	1	Not Significant (P>0.05) (two-sided)		Two-sided Probability	0.7194	Not Significant (P>0.05) (two-sided)		Two-sided Probability	1	Not Significant (P>0.05) (two-sided)
T4b- test 4	T4c-test 4			T4b- test 4	TM-Cp.			T4b- test 4	Limf-B			T4b- test 4	Glu-B			T4b- test 4	Norep-B			T4b- test 4	Prol-B			T4b- test 4	Cort-B
10	8			10	74.97			10	46.3			10	83			10	1.6			10	6.69			10	15.8
4	7			4	63.94			4	40.7			4	87			4	3.8			4	7.25			4	14.7
9	12			9	77.71			9	41			9	91			9	3.07			9	4.92			9	12.9
8	10			8	72.33			8	49.2			8	85			8	3.01			8	6.53			8	12
12	8			12	66.76			12	56.7			12	84			12	4.16			12	7.87			12	9.49
8	9			8	77.91			8	33.8			8	109			8	1.06			8	9.15			8	10.6
Nonparametric Correlation				Nonparametric Correlation				Nonparametric Correlation				Nonparametric Correlation				Nonparametric Correlation				Nonparametric Correlation				Nonparametric Correlation
Spearman Rank Correlation				Spearman Rank Correlation				Spearman Rank Correlation				Spearman Rank Correlation				Spearman Rank Correlation				Spearman Rank Correlation				Spearman Rank Correlation
Statistic	75			Statistic	75.5			Statistic	85			Statistic	63.5			Statistic	77			Statistic	73			Statistic	69.5
Mean	73.5			Mean	73.5			Mean	73.5			Mean	73.5			Mean	73.5			Mean	73.5			Mean	73.5
Variance	57.8			Variance	59.5			Variance	59.5			Variance	59.5			Variance	59.5			Variance	59.5			Variance	59.5
Rho (corrected for ties)	0.0882353			Rho (corrected for ties)	0.115954			Rho (corrected for ties)	0.666737			Rho (corrected for ties)	-0.579771			Rho (corrected for ties)	0.20292			Rho (corrected for ties)	-0.0289886			Rho (corrected for ties)	-0.231908
Exact Method				Exact Method				Exact Method				Exact Method				Exact Method				Exact Method				Exact Method
Upper Probability	0.9986			Upper Probability	0.9986			Upper Probability	0.9986			Upper Probability	0.9986			Upper Probability	0.9986			Upper Probability	0.9986			Upper Probability	0.9986
Lower Probability	0.001389			Lower Probability	0.001389			Lower Probability	0.001389			Lower Probability	0.001389			Lower Probability	0.001389			Lower Probability	0.001389			Lower Probability	0.001389
Two-sided Probability	0.002778	** (P<=0.01) (two-sided)		Two-sided Probability	0.002778	** (P<=0.01) (two-sided)		Two-sided Probability	0.002778	** (P<=0.01) (two-sided)		Two-sided Probability	0.002778	** (P<=0.01) (two-sided)		Two-sided Probability	0.002778	** (P<=0.01) (two-sided)		Two-sided Probability	0.002778	** (P<=0.01) (two-sided)		Two-sided Probability	0.002778	** (P<=0.01) (two-sided)
Kendall Rank Correlation				Kendall Rank Correlation				Kendall Rank Correlation				Kendall Rank Correlation				Kendall Rank Correlation				Kendall Rank Correlation				Kendall Rank Correlation
Statistic	1			Statistic	0			Statistic	8			Statistic	-6			Statistic	2			Statistic	0			Statistic	-2
Mean	0			Mean	0			Mean	0			Mean	0			Mean	0			Mean	0			Mean	0
Variance	26.4			Variance	27.3333			Variance	27.3333			Variance	27.3333			Variance	27.3333			Variance	27.3333			Variance	27.3333
Tau (corrected for ties)	0.0714286			Tau (corrected for ties)	0			Tau (corrected for ties)	0.552052			Tau (corrected for ties)	-0.414039			Tau (corrected for ties)	0.138013			Tau (corrected for ties)	0			Tau (corrected for ties)	-0.138013
Normal Approximation Method				Normal Approximation Method				Normal Approximation Method				Normal Approximation Method				Normal Approximation Method				Normal Approximation Method				Normal Approximation Method
Caution: the probabilities given are approximates for large N.				Caution: the probabilities given are approximates for large N.				Caution: the probabilities given are approximates for large N.				Caution: the probabilities given are approximates for large N.				Caution: the probabilities given are approximates for large N.				Caution: the probabilities given are approximates for large N.				Caution: the probabilities given are approximates for large N.
Z	0.194625			Z	0			Z	1.53018			Z	-1.14764			Z	0.382546			Z	0			Z	-0.382546
With Continuity Correction (for ABS(Z)<=2)				With Continuity Correction (for ABS(Z)<=2)				With Continuity Correction (for ABS(Z)<=2)				With Continuity Correction (for ABS(Z)<=2)				With Continuity Correction (for ABS(Z)<=2)				With Continuity Correction (for ABS(Z)<=2)				With Continuity Correction (for ABS(Z)<=2)
Upper Probability	0.4612			Upper Probability	0.5381			Upper Probability	0.07571			Upper Probability	0.8931			Upper Probability	0.3871			Upper Probability	0.5381			Upper Probability	0.6837
Lower Probability	0.6148			Lower Probability	0.5381			Lower Probability	0.948			Lower Probability	0.1464			Lower Probability	0.6837			Lower Probability	0.5381			Lower Probability	0.3871
Two-sided Probability	0.9225	Not Significant (P>0.05) (two-sided)		Two-sided Probability	1	Not Significant (P>0.05) (two-sided)		Two-sided Probability	0.1514	Not Significant (P>0.05) (two-sided)		Two-sided Probability	0.2928	Not Significant (P>0.05) (two-sided)		Two-sided Probability	0.7742	Not Significant (P>0.05) (two-sided)		Two-sided Probability	1	Not Significant (P>0.05) (two-sided)		Two-sided Probability	0.7742	Not Significant (P>0.05) (two-sided)
Without Continuity Correction (for ABS(Z)>2)				Without Continuity Correction (for ABS(Z)>2)				Without Continuity Correction (for ABS(Z)>2)				Without Continuity Correction (for ABS(Z)>2)				Without Continuity Correction (for ABS(Z)>2)				Without Continuity Correction (for ABS(Z)>2)				Without Continuity Correction (for ABS(Z)>2)
Upper Probability	0.4228			Upper Probability	0.5			Upper Probability	0.06299			Upper Probability	0.8744			Upper Probability	0.351			Upper Probability	0.5			Upper Probability	0.649
Lower Probability	0.5772			Lower Probability	0.5			Lower Probability	0.937			Lower Probability	0.1256			Lower Probability	0.649			Lower Probability	0.5			Lower Probability	0.351
Two-sided Probability	0.8457	Not Significant (P>0.05) (two-sided)		Two-sided Probability	1	Not Significant (P>0.05) (two-sided)		Two-sided Probability	0.126	Not Significant (P>0.05) (two-sided)		Two-sided Probability	0.2511	Not Significant (P>0.05) (two-sided)		Two-sided Probability	0.7021	Not Significant (P>0.05) (two-sided)		Two-sided Probability	1	Not Significant (P>0.05) (two-sided)		Two-sided Probability	0.7021	Not Significant (P>0.05) (two-sided)
Exact Method(Not corrected for ties)				Exact Method(Not corrected for ties)				Exact Method(Not corrected for ties)				Exact Method(Not corrected for ties)				Exact Method(Not corrected for ties)				Exact Method(Not corrected for ties)				Exact Method(Not corrected for ties)
Upper Probability	0.5			Upper Probability	0.6403			Upper Probability	0.1361			Upper Probability	0.2347			Upper Probability	0.5			Upper Probability	0.6403			Upper Probability	0.5
Lower Probability	0.5			Lower Probability	0.3597			Lower Probability	0.8639			Lower Probability	0.7653			Lower Probability	0.5			Lower Probability	0.3597			Lower Probability	0.5
Two-sided Probability	1	Not Significant (P>0.05) (two-sided)		Two-sided Probability	0.7194	Not Significant (P>0.05) (two-sided)		Two-sided Probability	0.2722	Not Significant (P>0.05) (two-sided)		Two-sided Probability	0.4694	Not Significant (P>0.05) (two-sided)		Two-sided Probability	1	Not Significant (P>0.05) (two-sided)		Two-sided Probability	0.7194	Not Significant (P>0.05) (two-sided)		Two-sided Probability	1	Not Significant (P>0.05) (two-sided)
T4c-test 4	TM-Cp.			T4c-test 4	Limf-B			T4c-test 4	Glu-B			T4c-test 4	Norep-B			T4c-test 4	Prol-B			T4c-test 4	Cort-B
8	74.97			8	46.3			8	83			8	1.6			8	6.69			8	15.8
7	63.94			7	40.7			7	87			7	3.8			7	7.25			7	14.7
12	77.71			12	41			12	91			12	3.07			12	4.92			12	12.9
10	72.33			10	49.2			10	85			10	3.01			10	6.53			10	12
8	66.76			8	56.7			8	84			8	4.16			8	7.87			8	9.49
9	77.91			9	33.8			9	109			9	1.06			9	9.15			9	10.6
Nonparametric Correlation				Nonparametric Correlation				Nonparametric Correlation				Nonparametric Correlation				Nonparametric Correlation				Nonparametric Correlation
Spearman Rank Correlation				Spearman Rank Correlation				Spearman Rank Correlation				Spearman Rank Correlation				Spearman Rank Correlation				Spearman Rank Correlation
Statistic	85			Statistic	74			Statistic	80.5			Statistic	68			Statistic	64			Statistic	69.5
Mean	73.5			Mean	73.5			Mean	73.5			Mean	73.5			Mean	73.5			Mean	73.5
Variance	59.5			Variance	59.5			Variance	59.5			Variance	59.5			Variance	59.5			Variance	59.5
Rho (corrected for ties)	0.666737			Rho (corrected for ties)	0.0289886			Rho (corrected for ties)	0.40584			Rho (corrected for ties)	-0.318874			Rho (corrected for ties)	-0.550782			Rho (corrected for ties)	-0.231908
Exact Method				Exact Method				Exact Method				Exact Method				Exact Method				Exact Method
Upper Probability	0.9986			Upper Probability	0.9986			Upper Probability	0.9986			Upper Probability	0.9986			Upper Probability	0.9986			Upper Probability	0.9986
Lower Probability	0.001389			Lower Probability	0.001389			Lower Probability	0.001389			Lower Probability	0.001389			Lower Probability	0.001389			Lower Probability	0.001389
Two-sided Probability	0.002778	** (P<=0.01) (two-sided)		Two-sided Probability	0.002778	** (P<=0.01) (two-sided)		Two-sided Probability	0.002778	** (P<=0.01) (two-sided)		Two-sided Probability	0.002778	** (P<=0.01) (two-sided)		Two-sided Probability	0.002778	** (P<=0.01) (two-sided)		Two-sided Probability	0.002778	** (P<=0.01) (two-sided)
Kendall Rank Correlation				Kendall Rank Correlation				Kendall Rank Correlation				Kendall Rank Correlation				Kendall Rank Correlation				Kendall Rank Correlation
Statistic	8			Statistic	0			Statistic	4			Statistic	-2			Statistic	-6			Statistic	0
Mean	0			Mean	0			Mean	0			Mean	0			Mean	0			Mean	0
Variance	27.3333			Variance	27.3333			Variance	27.3333			Variance	27.3333			Variance	27.3333			Variance	27.3333
Tau (corrected for ties)	0.552052			Tau (corrected for ties)	0			Tau (corrected for ties)	0.276026			Tau (corrected for ties)	-0.138013			Tau (corrected for ties)	-0.414039			Tau (corrected for ties)	0
Normal Approximation Method				Normal Approximation Method				Normal Approximation Method				Normal Approximation Method				Normal Approximation Method				Normal Approximation Method
Caution: the probabilities given are approximates for large N.				Caution: the probabilities given are approximates for large N.				Caution: the probabilities given are approximates for large N.				Caution: the probabilities given are approximates for large N.				Caution: the probabilities given are approximates for large N.				Caution: the probabilities given are approximates for large N.
Z	1.53018			Z	0			Z	0.765092			Z	-0.382546			Z	-1.14764			Z	0
With Continuity Correction (for ABS(Z)<=2)				With Continuity Correction (for ABS(Z)<=2)				With Continuity Correction (for ABS(Z)<=2)				With Continuity Correction (for ABS(Z)<=2)				With Continuity Correction (for ABS(Z)<=2)				With Continuity Correction (for ABS(Z)<=2)
Upper Probability	0.07571			Upper Probability	0.5381			Upper Probability	0.2516			Upper Probability	0.6837			Upper Probability	0.8931			Upper Probability	0.5381
Lower Probability	0.948			Lower Probability	0.5381			Lower Probability	0.8053			Lower Probability	0.3871			Lower Probability	0.1464			Lower Probability	0.5381
Two-sided Probability	0.1514	Not Significant (P>0.05) (two-sided)		Two-sided Probability	1	Not Significant (P>0.05) (two-sided)		Two-sided Probability	0.5032	Not Significant (P>0.05) (two-sided)		Two-sided Probability	0.7742	Not Significant (P>0.05) (two-sided)		Two-sided Probability	0.2928	Not Significant (P>0.05) (two-sided)		Two-sided Probability	1	Not Significant (P>0.05) (two-sided)
Without Continuity Correction (for ABS(Z)>2)				Without Continuity Correction (for ABS(Z)>2)				Without Continuity Correction (for ABS(Z)>2)				Without Continuity Correction (for ABS(Z)>2)				Without Continuity Correction (for ABS(Z)>2)				Without Continuity Correction (for ABS(Z)>2)
Upper Probability	0.06299			Upper Probability	0.5			Upper Probability	0.2221			Upper Probability	0.649			Upper Probability	0.8744			Upper Probability	0.5
Lower Probability	0.937			Lower Probability	0.5			Lower Probability	0.7779			Lower Probability	0.351			Lower Probability	0.1256			Lower Probability	0.5
Two-sided Probability	0.126	Not Significant (P>0.05) (two-sided)		Two-sided Probability	1	Not Significant (P>0.05) (two-sided)		Two-sided Probability	0.4442	Not Significant (P>0.05) (two-sided)		Two-sided Probability	0.7021	Not Significant (P>0.05) (two-sided)		Two-sided Probability	0.2511	Not Significant (P>0.05) (two-sided)		Two-sided Probability	1	Not Significant (P>0.05) (two-sided)
Exact Method(Not corrected for ties)				Exact Method(Not corrected for ties)				Exact Method(Not corrected for ties)				Exact Method(Not corrected for ties)				Exact Method(Not corrected for ties)				Exact Method(Not corrected for ties)
Upper Probability	0.1361			Upper Probability	0.6403			Upper Probability	0.3597			Upper Probability	0.5			Upper Probability	0.2347			Upper Probability	0.6403
Lower Probability	0.8639			Lower Probability	0.3597			Lower Probability	0.6403			Lower Probability	0.5			Lower Probability	0.7653			Lower Probability	0.3597
Two-sided Probability	0.2722	Not Significant (P>0.05) (two-sided)		Two-sided Probability	0.7194	Not Significant (P>0.05) (two-sided)		Two-sided Probability	0.7194	Not Significant (P>0.05) (two-sided)		Two-sided Probability	1	Not Significant (P>0.05) (two-sided)		Two-sided Probability	0.4694	Not Significant (P>0.05) (two-sided)		Two-sided Probability	0.7194	Not Significant (P>0.05) (two-sided)
E4
Limf. Pre-eff	T4-test 1			Limf. Pre-eff	T4 -test 2			Limf. Pre-eff	T4-test 3			Limf. Pre-eff	T4a-test 4			Limf. Pre-eff	T4b- test 4			Limf. Pre-eff	T4c-test 4			Limf. Pre-eff	TM-Cp.			Limf. Pre-eff	Limf-B			Limf. Pre-eff	Glu-B			Limf. Pre-eff	Norep-B			Limf. Pre-eff	Prol-B			Limf. Pre-eff	Cort-B
43.6	40			43.6	24			43.6	26			43.6	10			43.6	7			43.6	8			43.6	74.97			43.6	46.3			43.6	83			43.6	1.6			43.6	6.69			43.6	15.8
43.8	34			43.8	26			43.8	15			43.8	4			43.8	5			43.8	7			43.8	63.94			43.8	40.7			43.8	87			43.8	3.8			43.8	7.25			43.8	14.7
39.3	30			39.3	24			39.3	22			39.3	9			39.3	5			39.3	12			39.3	77.71			39.3	41			39.3	91			39.3	3.07			39.3	4.92			39.3	12.9
45.8	38			45.8	23			45.8	13			45.8	8			45.8	6			45.8	10			45.8	72.33			45.8	49.2			45.8	85			45.8	3.01			45.8	6.53			45.8	12
62	28			62	22			62	28			62	12			62	9			62	8			62	66.76			62	56.7			62	84			62	4.16			62	7.87			62	9.49
40.8	40			40.8	21			40.8	21			40.8	8			40.8	8			40.8	9			40.8	77.91			40.8	33.8			40.8	109			40.8	1.06			40.8	9.15			40.8	10.6
Nonparametric Correlation				Nonparametric Correlation				Nonparametric Correlation				Nonparametric Correlation				Nonparametric Correlation				Nonparametric Correlation				Nonparametric Correlation				Nonparametric Correlation				Nonparametric Correlation				Nonparametric Correlation				Nonparametric Correlation				Nonparametric Correlation
Spearman Rank Correlation				Spearman Rank Correlation				Spearman Rank Correlation				Spearman Rank Correlation				Spearman Rank Correlation				Spearman Rank Correlation				Spearman Rank Correlation				Spearman Rank Correlation				Spearman Rank Correlation				Spearman Rank Correlation				Spearman Rank Correlation				Spearman Rank Correlation
Statistic	67.5			Statistic	71			Statistic	74			Statistic	76.5			Statistic	80.5			Statistic	65.5			Statistic	60			Statistic	86			Statistic	63			Statistic	83			Statistic	78			Statistic	67
Mean	73.5			Mean	73.5			Mean	73.5			Mean	73.5			Mean	73.5			Mean	73.5			Mean	73.5			Mean	73.5			Mean	73.5			Mean	73.5			Mean	73.5			Mean	73.5
Variance	59.5			Variance	59.5			Variance	61.25			Variance	59.5			Variance	59.5			Variance	59.5			Variance	61.25			Variance	61.25			Variance	61.25			Variance	61.25			Variance	61.25			Variance	61.25
Rho (corrected for ties)	-0.347863			Rho (corrected for ties)	-0.144943			Rho (corrected for ties)	0.0285714			Rho (corrected for ties)	0.173931			Rho (corrected for ties)	0.40584			Rho (corrected for ties)	-0.463817			Rho (corrected for ties)	-0.771429			Rho (corrected for ties)	0.714286			Rho (corrected for ties)	-0.6			Rho (corrected for ties)	0.542857			Rho (corrected for ties)	0.257143			Rho (corrected for ties)	-0.371429
Exact Method				Exact Method				Exact Method				Exact Method				Exact Method				Exact Method				Exact Method				Exact Method				Exact Method				Exact Method				Exact Method				Exact Method
Upper Probability	0.9986			Upper Probability	0.9986			Upper Probability	0.9986			Upper Probability	0.9986			Upper Probability	0.9986			Upper Probability	0.9986			Upper Probability	0.9986			Upper Probability	0.9986			Upper Probability	0.9986			Upper Probability	0.9986			Upper Probability	0.9986			Upper Probability	0.9986
Lower Probability	0.001389			Lower Probability	0.001389			Lower Probability	0.001389			Lower Probability	0.001389			Lower Probability	0.001389			Lower Probability	0.001389			Lower Probability	0.001389			Lower Probability	0.001389			Lower Probability	0.001389			Lower Probability	0.001389			Lower Probability	0.001389			Lower Probability	0.001389
Two-sided Probability	0.002778	** (P<=0.01) (two-sided)		Two-sided Probability	0.002778	** (P<=0.01) (two-sided)		Two-sided Probability	0.002778	** (P<=0.01) (two-sided)		Two-sided Probability	0.002778	** (P<=0.01) (two-sided)		Two-sided Probability	0.002778	** (P<=0.01) (two-sided)		Two-sided Probability	0.002778	** (P<=0.01) (two-sided)		Two-sided Probability	0.002778	** (P<=0.01) (two-sided)		Two-sided Probability	0.002778	** (P<=0.01) (two-sided)		Two-sided Probability	0.002778	** (P<=0.01) (two-sided)		Two-sided Probability	0.002778	** (P<=0.01) (two-sided)		Two-sided Probability	0.002778	** (P<=0.01) (two-sided)		Two-sided Probability	0.002778	** (P<=0.01) (two-sided)
Kendall Rank Correlation				Kendall Rank Correlation				Kendall Rank Correlation				Kendall Rank Correlation				Kendall Rank Correlation				Kendall Rank Correlation				Kendall Rank Correlation				Kendall Rank Correlation				Kendall Rank Correlation				Kendall Rank Correlation				Kendall Rank Correlation				Kendall Rank Correlation
Statistic	-4			Statistic	-2			Statistic	-1			Statistic	2			Statistic	4			Statistic	-6			Statistic	-9			Statistic	9			Statistic	-7			Statistic	7			Statistic	3			Statistic	-5
Mean	0			Mean	0			Mean	0			Mean	0			Mean	0			Mean	0			Mean	0			Mean	0			Mean	0			Mean	0			Mean	0			Mean	0
Variance	27.3333			Variance	27.3333			Variance	28.3333			Variance	27.3333			Variance	27.3333			Variance	27.3333			Variance	28.3333			Variance	28.3333			Variance	28.3333			Variance	28.3333			Variance	28.3333			Variance	28.3333
Tau (corrected for ties)	-0.276026			Tau (corrected for ties)	-0.138013			Tau (corrected for ties)	-0.0666667			Tau (corrected for ties)	0.138013			Tau (corrected for ties)	0.276026			Tau (corrected for ties)	-0.414039			Tau (corrected for ties)	-0.6			Tau (corrected for ties)	0.6			Tau (corrected for ties)	-0.466667			Tau (corrected for ties)	0.466667			Tau (corrected for ties)	0.2			Tau (corrected for ties)	-0.333333
Normal Approximation Method				Normal Approximation Method				Normal Approximation Method				Normal Approximation Method				Normal Approximation Method				Normal Approximation Method				Normal Approximation Method				Normal Approximation Method				Normal Approximation Method				Normal Approximation Method				Normal Approximation Method				Normal Approximation Method
Caution: the probabilities given are approximates for large N.				Caution: the probabilities given are approximates for large N.				Caution: the probabilities given are approximates for large N.				Caution: the probabilities given are approximates for large N.				Caution: the probabilities given are approximates for large N.				Caution: the probabilities given are approximates for large N.				Caution: the probabilities given are approximates for large N.				Caution: the probabilities given are approximates for large N.				Caution: the probabilities given are approximates for large N.				Caution: the probabilities given are approximates for large N.				Caution: the probabilities given are approximates for large N.				Caution: the probabilities given are approximates for large N.
Z	-0.765092			Z	-0.382546			Z	-0.187867			Z	0.382546			Z	0.765092			Z	-1.14764			Z	-1.69081			Z	1.69081			Z	-1.31507			Z	1.31507			Z	0.563602			Z	-0.939336
With Continuity Correction (for ABS(Z)<=2)				With Continuity Correction (for ABS(Z)<=2)				With Continuity Correction (for ABS(Z)<=2)				With Continuity Correction (for ABS(Z)<=2)				With Continuity Correction (for ABS(Z)<=2)				With Continuity Correction (for ABS(Z)<=2)				With Continuity Correction (for ABS(Z)<=2)				With Continuity Correction (for ABS(Z)<=2)				With Continuity Correction (for ABS(Z)<=2)				With Continuity Correction (for ABS(Z)<=2)				With Continuity Correction (for ABS(Z)<=2)				With Continuity Correction (for ABS(Z)<=2)
Upper Probability	0.8053			Upper Probability	0.6837			Upper Probability	0.611			Upper Probability	0.3871			Upper Probability	0.2516			Upper Probability	0.8931			Upper Probability	0.9628			Upper Probability	0.05515			Upper Probability	0.9206			Upper Probability	0.111			Upper Probability	0.3193			Upper Probability	0.8493
Lower Probability	0.2516			Lower Probability	0.3871			Lower Probability	0.4626			Lower Probability	0.6837			Lower Probability	0.8053			Lower Probability	0.1464			Lower Probability	0.05515			Lower Probability	0.9628			Lower Probability	0.111			Lower Probability	0.9206			Lower Probability	0.7446			Lower Probability	0.1989
Two-sided Probability	0.5032	Not Significant (P>0.05) (two-sided)		Two-sided Probability	0.7742	Not Significant (P>0.05) (two-sided)		Two-sided Probability	0.9252	Not Significant (P>0.05) (two-sided)		Two-sided Probability	0.7742	Not Significant (P>0.05) (two-sided)		Two-sided Probability	0.5032	Not Significant (P>0.05) (two-sided)		Two-sided Probability	0.2928	Not Significant (P>0.05) (two-sided)		Two-sided Probability	0.1103	Not Significant (P>0.05) (two-sided)		Two-sided Probability	0.1103	Not Significant (P>0.05) (two-sided)		Two-sided Probability	0.222	Not Significant (P>0.05) (two-sided)		Two-sided Probability	0.222	Not Significant (P>0.05) (two-sided)		Two-sided Probability	0.6386	Not Significant (P>0.05) (two-sided)		Two-sided Probability	0.3979	Not Significant (P>0.05) (two-sided)
Without Continuity Correction (for ABS(Z)>2)				Without Continuity Correction (for ABS(Z)>2)				Without Continuity Correction (for ABS(Z)>2)				Without Continuity Correction (for ABS(Z)>2)				Without Continuity Correction (for ABS(Z)>2)				Without Continuity Correction (for ABS(Z)>2)				Without Continuity Correction (for ABS(Z)>2)				Without Continuity Correction (for ABS(Z)>2)				Without Continuity Correction (for ABS(Z)>2)				Without Continuity Correction (for ABS(Z)>2)				Without Continuity Correction (for ABS(Z)>2)				Without Continuity Correction (for ABS(Z)>2)
Upper Probability	0.7779			Upper Probability	0.649			Upper Probability	0.5745			Upper Probability	0.351			Upper Probability	0.2221			Upper Probability	0.8744			Upper Probability	0.9546			Upper Probability	0.04544			Upper Probability	0.9058			Upper Probability	0.09424			Upper Probability	0.2865			Upper Probability	0.8262
Lower Probability	0.2221			Lower Probability	0.351			Lower Probability	0.4255			Lower Probability	0.649			Lower Probability	0.7779			Lower Probability	0.1256			Lower Probability	0.04544			Lower Probability	0.9546			Lower Probability	0.09424			Lower Probability	0.9058			Lower Probability	0.7135			Lower Probability	0.1738
Two-sided Probability	0.4442	Not Significant (P>0.05) (two-sided)		Two-sided Probability	0.7021	Not Significant (P>0.05) (two-sided)		Two-sided Probability	0.851	Not Significant (P>0.05) (two-sided)		Two-sided Probability	0.7021	Not Significant (P>0.05) (two-sided)		Two-sided Probability	0.4442	Not Significant (P>0.05) (two-sided)		Two-sided Probability	0.2511	Not Significant (P>0.05) (two-sided)		Two-sided Probability	0.09087	Not Significant (P>0.05) (two-sided)		Two-sided Probability	0.09087	Not Significant (P>0.05) (two-sided)		Two-sided Probability	0.1885	Not Significant (P>0.05) (two-sided)		Two-sided Probability	0.1885	Not Significant (P>0.05) (two-sided)		Two-sided Probability	0.573	Not Significant (P>0.05) (two-sided)		Two-sided Probability	0.3476	Not Significant (P>0.05) (two-sided)
Exact Method(Not corrected for ties)				Exact Method(Not corrected for ties)				Exact Method(Not corrected for ties)				Exact Method(Not corrected for ties)				Exact Method(Not corrected for ties)				Exact Method(Not corrected for ties)				Exact Method(Not corrected for ties)				Exact Method(Not corrected for ties)				Exact Method(Not corrected for ties)				Exact Method(Not corrected for ties)				Exact Method(Not corrected for ties)				Exact Method(Not corrected for ties)
Upper Probability	0.3597			Upper Probability	0.5			Upper Probability	0.5			Upper Probability	0.5			Upper Probability	0.3597			Upper Probability	0.2347			Upper Probability	0.06806			Upper Probability	0.06806			Upper Probability	0.1361			Upper Probability	0.1361			Upper Probability	0.3597			Upper Probability	0.2347
Lower Probability	0.6403			Lower Probability	0.5			Lower Probability	0.5			Lower Probability	0.5			Lower Probability	0.6403			Lower Probability	0.7653			Lower Probability	0.9319			Lower Probability	0.9319			Lower Probability	0.8639			Lower Probability	0.8639			Lower Probability	0.6403			Lower Probability	0.7653
Two-sided Probability	0.7194	Not Significant (P>0.05) (two-sided)		Two-sided Probability	1	Not Significant (P>0.05) (two-sided)		Two-sided Probability	1	Not Significant (P>0.05) (two-sided)		Two-sided Probability	1	Not Significant (P>0.05) (two-sided)		Two-sided Probability	0.7194	Not Significant (P>0.05) (two-sided)		Two-sided Probability	0.4694	Not Significant (P>0.05) (two-sided)		Two-sided Probability	0.1361	Not Significant (P>0.05) (two-sided)		Two-sided Probability	0.1361	Not Significant (P>0.05) (two-sided)		Two-sided Probability	0.2722	Not Significant (P>0.05) (two-sided)		Two-sided Probability	0.2722	Not Significant (P>0.05) (two-sided)		Two-sided Probability	0.7194	Not Significant (P>0.05) (two-sided)		Two-sided Probability	0.4694	Not Significant (P>0.05) (two-sided)
Limf. Post-eff	T4-test 1			Limf. Post-eff	T4 -test 2			Limf. Post-eff	T4-test 3			Limf. Post-eff	T4a-test 4			Limf. Post-eff	T4b- test 4			Limf. Post-eff	T4c-test 4			Limf. Post-eff	TM-Cp.			Limf. Post-eff	Limf-B			Limf. Post-eff	Glu-B			Limf. Post-eff	Norep-B			Limf. Post-eff	Prol-B			Limf. Post-eff	Cort-B
52	40			52	24			52	26			52	10			52	7			52	8			52	74.97			52	46.3			52	83			52	1.6			52	6.69			52	15.8
53.4	34			53.4	26			53.4	15			53.4	4			53.4	5			53.4	7			53.4	63.94			53.4	40.7			53.4	87			53.4	3.8			53.4	7.25			53.4	14.7
40	30			40	24			40	22			40	9			40	5			40	12			40	77.71			40	41			40	91			40	3.07			40	4.92			40	12.9
47.1	38			47.1	23			47.1	13			47.1	8			47.1	6			47.1	10			47.1	72.33			47.1	49.2			47.1	85			47.1	3.01			47.1	6.53			47.1	12
56.3	28			56.3	22			56.3	28			56.3	12			56.3	9			56.3	8			56.3	66.76			56.3	56.7			56.3	84			56.3	4.16			56.3	7.87			56.3	9.49
53.9	40			53.9	21			53.9	21			53.9	8			53.9	8			53.9	9			53.9	77.91			53.9	33.8			53.9	109			53.9	1.06			53.9	9.15			53.9	10.6
Nonparametric Correlation				Nonparametric Correlation				Nonparametric Correlation				Nonparametric Correlation				Nonparametric Correlation				Nonparametric Correlation				Nonparametric Correlation				Nonparametric Correlation				Nonparametric Correlation				Nonparametric Correlation				Nonparametric Correlation				Nonparametric Correlation
Spearman Rank Correlation				Spearman Rank Correlation				Spearman Rank Correlation				Spearman Rank Correlation				Spearman Rank Correlation				Spearman Rank Correlation				Spearman Rank Correlation				Spearman Rank Correlation				Spearman Rank Correlation				Spearman Rank Correlation				Spearman Rank Correlation				Spearman Rank Correlation
Statistic	72			Statistic	65			Statistic	80			Statistic	76.5			Statistic	86.5			Statistic	62.5			Statistic	69			Statistic	74			Statistic	72			Statistic	77			Statistic	90			Statistic	64
Mean	73.5			Mean	73.5			Mean	73.5			Mean	73.5			Mean	73.5			Mean	73.5			Mean	73.5			Mean	73.5			Mean	73.5			Mean	73.5			Mean	73.5			Mean	73.5
Variance	59.5			Variance	59.5			Variance	61.25			Variance	59.5			Variance	59.5			Variance	59.5			Variance	61.25			Variance	61.25			Variance	61.25			Variance	61.25			Variance	61.25			Variance	61.25
Rho (corrected for ties)	-0.0869657			Rho (corrected for ties)	-0.492805			Rho (corrected for ties)	0.371429			Rho (corrected for ties)	0.173931			Rho (corrected for ties)	0.753702			Rho (corrected for ties)	-0.637748			Rho (corrected for ties)	-0.257143			Rho (corrected for ties)	0.0285714			Rho (corrected for ties)	-0.0857143			Rho (corrected for ties)	0.2			Rho (corrected for ties)	0.942857			Rho (corrected for ties)	-0.542857
Exact Method				Exact Method				Exact Method				Exact Method				Exact Method				Exact Method				Exact Method				Exact Method				Exact Method				Exact Method				Exact Method				Exact Method
Upper Probability	0.9986			Upper Probability	0.9986			Upper Probability	0.9986			Upper Probability	0.9986			Upper Probability	0.9986			Upper Probability	0.9986			Upper Probability	0.9986			Upper Probability	0.9986			Upper Probability	0.9986			Upper Probability	0.9986			Upper Probability	0.9986			Upper Probability	0.9986
Lower Probability	0.001389			Lower Probability	0.001389			Lower Probability	0.001389			Lower Probability	0.001389			Lower Probability	0.001389			Lower Probability	0.001389			Lower Probability	0.001389			Lower Probability	0.001389			Lower Probability	0.001389			Lower Probability	0.001389			Lower Probability	0.001389			Lower Probability	0.001389
Two-sided Probability	0.002778	** (P<=0.01) (two-sided)		Two-sided Probability	0.002778	** (P<=0.01) (two-sided)		Two-sided Probability	0.002778	** (P<=0.01) (two-sided)		Two-sided Probability	0.002778	** (P<=0.01) (two-sided)		Two-sided Probability	0.002778	** (P<=0.01) (two-sided)		Two-sided Probability	0.002778	** (P<=0.01) (two-sided)		Two-sided Probability	0.002778	** (P<=0.01) (two-sided)		Two-sided Probability	0.002778	** (P<=0.01) (two-sided)		Two-sided Probability	0.002778	** (P<=0.01) (two-sided)		Two-sided Probability	0.002778	** (P<=0.01) (two-sided)		Two-sided Probability	0.002778	** (P<=0.01) (two-sided)		Two-sided Probability	0.002778	** (P<=0.01) (two-sided)
Kendall Rank Correlation				Kendall Rank Correlation				Kendall Rank Correlation				Kendall Rank Correlation				Kendall Rank Correlation				Kendall Rank Correlation				Kendall Rank Correlation				Kendall Rank Correlation				Kendall Rank Correlation				Kendall Rank Correlation				Kendall Rank Correlation				Kendall Rank Correlation
Statistic	0			Statistic	-4			Statistic	5			Statistic	2			Statistic	10			Statistic	-8			Statistic	-3			Statistic	-1			Statistic	-1			Statistic	1			Statistic	13			Statistic	-7
Mean	0			Mean	0			Mean	0			Mean	0			Mean	0			Mean	0			Mean	0			Mean	0			Mean	0			Mean	0			Mean	0			Mean	0
Variance	27.3333			Variance	27.3333			Variance	28.3333			Variance	27.3333			Variance	27.3333			Variance	27.3333			Variance	28.3333			Variance	28.3333			Variance	28.3333			Variance	28.3333			Variance	28.3333			Variance	28.3333
Tau (corrected for ties)	0			Tau (corrected for ties)	-0.276026			Tau (corrected for ties)	0.333333			Tau (corrected for ties)	0.138013			Tau (corrected for ties)	0.690066			Tau (corrected for ties)	-0.552052			Tau (corrected for ties)	-0.2			Tau (corrected for ties)	-0.0666667			Tau (corrected for ties)	-0.0666667			Tau (corrected for ties)	0.0666667			Tau (corrected for ties)	0.866667			Tau (corrected for ties)	-0.466667
Normal Approximation Method				Normal Approximation Method				Normal Approximation Method				Normal Approximation Method				Normal Approximation Method				Normal Approximation Method				Normal Approximation Method				Normal Approximation Method				Normal Approximation Method				Normal Approximation Method				Normal Approximation Method				Normal Approximation Method
Caution: the probabilities given are approximates for large N.				Caution: the probabilities given are approximates for large N.				Caution: the probabilities given are approximates for large N.				Caution: the probabilities given are approximates for large N.				Caution: the probabilities given are approximates for large N.				Caution: the probabilities given are approximates for large N.				Caution: the probabilities given are approximates for large N.				Caution: the probabilities given are approximates for large N.				Caution: the probabilities given are approximates for large N.				Caution: the probabilities given are approximates for large N.				Caution: the probabilities given are approximates for large N.				Caution: the probabilities given are approximates for large N.
Z	0			Z	-0.765092			Z	0.939336			Z	0.382546			Z	1.91273			Z	-1.53018			Z	-0.563602			Z	-0.187867			Z	-0.187867			Z	0.187867			Z	2.44227			Z	-1.31507
With Continuity Correction (for ABS(Z)<=2)				With Continuity Correction (for ABS(Z)<=2)				With Continuity Correction (for ABS(Z)<=2)				With Continuity Correction (for ABS(Z)<=2)				With Continuity Correction (for ABS(Z)<=2)				With Continuity Correction (for ABS(Z)<=2)				With Continuity Correction (for ABS(Z)<=2)				With Continuity Correction (for ABS(Z)<=2)				With Continuity Correction (for ABS(Z)<=2)				With Continuity Correction (for ABS(Z)<=2)				With Continuity Correction (for ABS(Z)<=2)				With Continuity Correction (for ABS(Z)<=2)
Upper Probability	0.5381			Upper Probability	0.8053			Upper Probability	0.1989			Upper Probability	0.3871			Upper Probability	0.0346			Upper Probability	0.948			Upper Probability	0.7446			Upper Probability	0.611			Upper Probability	0.611			Upper Probability	0.4626			Upper Probability	0.009429			Upper Probability	0.9206
Lower Probability	0.5381			Lower Probability	0.2516			Lower Probability	0.8493			Lower Probability	0.6837			Lower Probability	0.9777			Lower Probability	0.07571			Lower Probability	0.3193			Lower Probability	0.4626			Lower Probability	0.4626			Lower Probability	0.611			Lower Probability	0.9944			Lower Probability	0.111
Two-sided Probability	1	Not Significant (P>0.05) (two-sided)		Two-sided Probability	0.5032	Not Significant (P>0.05) (two-sided)		Two-sided Probability	0.3979	Not Significant (P>0.05) (two-sided)		Two-sided Probability	0.7742	Not Significant (P>0.05) (two-sided)		Two-sided Probability	0.0692	Not Significant (P>0.05) (two-sided)		Two-sided Probability	0.1514	Not Significant (P>0.05) (two-sided)		Two-sided Probability	0.6386	Not Significant (P>0.05) (two-sided)		Two-sided Probability	0.9252	Not Significant (P>0.05) (two-sided)		Two-sided Probability	0.9252	Not Significant (P>0.05) (two-sided)		Two-sided Probability	0.9252	Not Significant (P>0.05) (two-sided)		Two-sided Probability	0.01886	* (P<=0.05) (two-sided)		Two-sided Probability	0.222	Not Significant (P>0.05) (two-sided)
Without Continuity Correction (for ABS(Z)>2)				Without Continuity Correction (for ABS(Z)>2)				Without Continuity Correction (for ABS(Z)>2)				Without Continuity Correction (for ABS(Z)>2)				Without Continuity Correction (for ABS(Z)>2)				Without Continuity Correction (for ABS(Z)>2)				Without Continuity Correction (for ABS(Z)>2)				Without Continuity Correction (for ABS(Z)>2)				Without Continuity Correction (for ABS(Z)>2)				Without Continuity Correction (for ABS(Z)>2)				Without Continuity Correction (for ABS(Z)>2)				Without Continuity Correction (for ABS(Z)>2)
Upper Probability	0.5			Upper Probability	0.7779			Upper Probability	0.1738			Upper Probability	0.351			Upper Probability	0.02789			Upper Probability	0.937			Upper Probability	0.7135			Upper Probability	0.5745			Upper Probability	0.5745			Upper Probability	0.4255			Upper Probability	0.007298			Upper Probability	0.9058
Lower Probability	0.5			Lower Probability	0.2221			Lower Probability	0.8262			Lower Probability	0.649			Lower Probability	0.9721			Lower Probability	0.06299			Lower Probability	0.2865			Lower Probability	0.4255			Lower Probability	0.4255			Lower Probability	0.5745			Lower Probability	0.9927			Lower Probability	0.09424
Two-sided Probability	1	Not Significant (P>0.05) (two-sided)		Two-sided Probability	0.4442	Not Significant (P>0.05) (two-sided)		Two-sided Probability	0.3476	Not Significant (P>0.05) (two-sided)		Two-sided Probability	0.7021	Not Significant (P>0.05) (two-sided)		Two-sided Probability	0.05578	Not Significant (P>0.05) (two-sided)		Two-sided Probability	0.126	Not Significant (P>0.05) (two-sided)		Two-sided Probability	0.573	Not Significant (P>0.05) (two-sided)		Two-sided Probability	0.851	Not Significant (P>0.05) (two-sided)		Two-sided Probability	0.851	Not Significant (P>0.05) (two-sided)		Two-sided Probability	0.851	Not Significant (P>0.05) (two-sided)		Two-sided Probability	0.0146	* (P<=0.05) (two-sided)		Two-sided Probability	0.1885	Not Significant (P>0.05) (two-sided)
Exact Method(Not corrected for ties)				Exact Method(Not corrected for ties)				Exact Method(Not corrected for ties)				Exact Method(Not corrected for ties)				Exact Method(Not corrected for ties)				Exact Method(Not corrected for ties)				Exact Method(Not corrected for ties)				Exact Method(Not corrected for ties)				Exact Method(Not corrected for ties)				Exact Method(Not corrected for ties)				Exact Method(Not corrected for ties)				Exact Method(Not corrected for ties)
Upper Probability	0.6403			Upper Probability	0.3597			Upper Probability	0.2347			Upper Probability	0.5			Upper Probability	0.06806			Upper Probability	0.1361			Upper Probability	0.3597			Upper Probability	0.5			Upper Probability	0.5			Upper Probability	0.5			Upper Probability	0.008333			Upper Probability	0.1361
Lower Probability	0.3597			Lower Probability	0.6403			Lower Probability	0.7653			Lower Probability	0.5			Lower Probability	0.9319			Lower Probability	0.8639			Lower Probability	0.6403			Lower Probability	0.5			Lower Probability	0.5			Lower Probability	0.5			Lower Probability	0.9917			Lower Probability	0.8639
Two-sided Probability	0.7194	Not Significant (P>0.05) (two-sided)		Two-sided Probability	0.7194	Not Significant (P>0.05) (two-sided)		Two-sided Probability	0.4694	Not Significant (P>0.05) (two-sided)		Two-sided Probability	1	Not Significant (P>0.05) (two-sided)		Two-sided Probability	0.1361	Not Significant (P>0.05) (two-sided)		Two-sided Probability	0.2722	Not Significant (P>0.05) (two-sided)		Two-sided Probability	0.7194	Not Significant (P>0.05) (two-sided)		Two-sided Probability	1	Not Significant (P>0.05) (two-sided)		Two-sided Probability	1	Not Significant (P>0.05) (two-sided)		Two-sided Probability	1	Not Significant (P>0.05) (two-sided)		Two-sided Probability	0.01667	* (P<=0.05) (two-sided)		Two-sided Probability	0.2722	Not Significant (P>0.05) (two-sided)
Glu Pre-eff	T4-test 1			Glu Pre-eff	T4 -test 2			Glu Pre-eff	T4-test 3			Glu Pre-eff	T4a-test 4			Glu Pre-eff	T4b- test 4			Glu Pre-eff	T4c-test 4			Glu Pre-eff	TM-Cp.			Glu Pre-eff	Limf-B			Glu Pre-eff	Glu-B			Glu Pre-eff	Norep-B			Glu Pre-eff	Prol-B			Glu Pre-eff	Cort-B
67.33	40			67.33	24			67.33	26			67.33	10			67.33	7			67.33	8			67.33	74.97			67.33	46.3			67.33	83			67.33	1.6			67.33	6.69			67.33	15.8
103.73	34			103.73	26			103.73	15			103.73	4			103.73	5			103.73	7			103.73	63.94			103.73	40.7			103.73	87			103.73	3.8			103.73	7.25			103.73	14.7
102.73	30			102.73	24			102.73	22			102.73	9			102.73	5			102.73	12			102.73	77.71			102.73	41			102.73	91			102.73	3.07			102.73	4.92			102.73	12.9
82	38			82	23			82	13			82	8			82	6			82	10			82	72.33			82	49.2			82	85			82	3.01			82	6.53			82	12
97	28			97	22			97	28			97	12			97	9			97	8			97	66.76			97	56.7			97	84			97	4.16			97	7.87			97	9.49
106	40			106	21			106	21			106	8			106	8			106	9			106	77.91			106	33.8			106	109			106	1.06			106	9.15			106	10.6
Nonparametric Correlation				Nonparametric Correlation				Nonparametric Correlation				Nonparametric Correlation				Nonparametric Correlation				Nonparametric Correlation				Nonparametric Correlation				Nonparametric Correlation				Nonparametric Correlation				Nonparametric Correlation				Nonparametric Correlation				Nonparametric Correlation
Spearman Rank Correlation				Spearman Rank Correlation				Spearman Rank Correlation				Spearman Rank Correlation				Spearman Rank Correlation				Spearman Rank Correlation				Spearman Rank Correlation				Spearman Rank Correlation				Spearman Rank Correlation				Spearman Rank Correlation				Spearman Rank Correlation				Spearman Rank Correlation
Statistic	72.5			Statistic	70.5			Statistic	69			Statistic	64			Statistic	71.5			Statistic	73			Statistic	77			Statistic	60			Statistic	89			Statistic	73			Statistic	82			Statistic	68
Mean	73.5			Mean	73.5			Mean	73.5			Mean	73.5			Mean	73.5			Mean	73.5			Mean	73.5			Mean	73.5			Mean	73.5			Mean	73.5			Mean	73.5			Mean	73.5
Variance	59.5			Variance	59.5			Variance	61.25			Variance	59.5			Variance	59.5			Variance	59.5			Variance	61.25			Variance	61.25			Variance	61.25			Variance	61.25			Variance	61.25			Variance	61.25
Rho (corrected for ties)	-0.0579771			Rho (corrected for ties)	-0.173931			Rho (corrected for ties)	-0.257143			Rho (corrected for ties)	-0.550782			Rho (corrected for ties)	-0.115954			Rho (corrected for ties)	-0.0289886			Rho (corrected for ties)	0.2			Rho (corrected for ties)	-0.771429			Rho (corrected for ties)	0.885714			Rho (corrected for ties)	-0.0285714			Rho (corrected for ties)	0.485714			Rho (corrected for ties)	-0.314286
Exact Method				Exact Method				Exact Method				Exact Method				Exact Method				Exact Method				Exact Method				Exact Method				Exact Method				Exact Method				Exact Method				Exact Method
Upper Probability	0.9986			Upper Probability	0.9986			Upper Probability	0.9986			Upper Probability	0.9986			Upper Probability	0.9986			Upper Probability	0.9986			Upper Probability	0.9986			Upper Probability	0.9986			Upper Probability	0.9986			Upper Probability	0.9986			Upper Probability	0.9986			Upper Probability	0.9986
Lower Probability	0.001389			Lower Probability	0.001389			Lower Probability	0.001389			Lower Probability	0.001389			Lower Probability	0.001389			Lower Probability	0.001389			Lower Probability	0.001389			Lower Probability	0.001389			Lower Probability	0.001389			Lower Probability	0.001389			Lower Probability	0.001389			Lower Probability	0.001389
Two-sided Probability	0.002778	** (P<=0.01) (two-sided)		Two-sided Probability	0.002778	** (P<=0.01) (two-sided)		Two-sided Probability	0.002778	** (P<=0.01) (two-sided)		Two-sided Probability	0.002778	** (P<=0.01) (two-sided)		Two-sided Probability	0.002778	** (P<=0.01) (two-sided)		Two-sided Probability	0.002778	** (P<=0.01) (two-sided)		Two-sided Probability	0.002778	** (P<=0.01) (two-sided)		Two-sided Probability	0.002778	** (P<=0.01) (two-sided)		Two-sided Probability	0.002778	** (P<=0.01) (two-sided)		Two-sided Probability	0.002778	** (P<=0.01) (two-sided)		Two-sided Probability	0.002778	** (P<=0.01) (two-sided)		Two-sided Probability	0.002778	** (P<=0.01) (two-sided)
Kendall Rank Correlation				Kendall Rank Correlation				Kendall Rank Correlation				Kendall Rank Correlation				Kendall Rank Correlation				Kendall Rank Correlation				Kendall Rank Correlation				Kendall Rank Correlation				Kendall Rank Correlation				Kendall Rank Correlation				Kendall Rank Correlation				Kendall Rank Correlation
Statistic	0			Statistic	-2			Statistic	-3			Statistic	-6			Statistic	-2			Statistic	0			Statistic	1			Statistic	-9			Statistic	11			Statistic	1			Statistic	5			Statistic	-3
Mean	0			Mean	0			Mean	0			Mean	0			Mean	0			Mean	0			Mean	0			Mean	0			Mean	0			Mean	0			Mean	0			Mean	0
Variance	27.3333			Variance	27.3333			Variance	28.3333			Variance	27.3333			Variance	27.3333			Variance	27.3333			Variance	28.3333			Variance	28.3333			Variance	28.3333			Variance	28.3333			Variance	28.3333			Variance	28.3333
Tau (corrected for ties)	0			Tau (corrected for ties)	-0.138013			Tau (corrected for ties)	-0.2			Tau (corrected for ties)	-0.414039			Tau (corrected for ties)	-0.138013			Tau (corrected for ties)	0			Tau (corrected for ties)	0.0666667			Tau (corrected for ties)	-0.6			Tau (corrected for ties)	0.733333			Tau (corrected for ties)	0.0666667			Tau (corrected for ties)	0.333333			Tau (corrected for ties)	-0.2
Normal Approximation Method				Normal Approximation Method				Normal Approximation Method				Normal Approximation Method				Normal Approximation Method				Normal Approximation Method				Normal Approximation Method				Normal Approximation Method				Normal Approximation Method				Normal Approximation Method				Normal Approximation Method				Normal Approximation Method
Caution: the probabilities given are approximates for large N.				Caution: the probabilities given are approximates for large N.				Caution: the probabilities given are approximates for large N.				Caution: the probabilities given are approximates for large N.				Caution: the probabilities given are approximates for large N.				Caution: the probabilities given are approximates for large N.				Caution: the probabilities given are approximates for large N.				Caution: the probabilities given are approximates for large N.				Caution: the probabilities given are approximates for large N.				Caution: the probabilities given are approximates for large N.				Caution: the probabilities given are approximates for large N.				Caution: the probabilities given are approximates for large N.
Z	0			Z	-0.382546			Z	-0.563602			Z	-1.14764			Z	-0.382546			Z	0			Z	0.187867			Z	-1.69081			Z	2.06654			Z	0.187867			Z	0.939336			Z	-0.563602
With Continuity Correction (for ABS(Z)<=2)				With Continuity Correction (for ABS(Z)<=2)				With Continuity Correction (for ABS(Z)<=2)				With Continuity Correction (for ABS(Z)<=2)				With Continuity Correction (for ABS(Z)<=2)				With Continuity Correction (for ABS(Z)<=2)				With Continuity Correction (for ABS(Z)<=2)				With Continuity Correction (for ABS(Z)<=2)				With Continuity Correction (for ABS(Z)<=2)				With Continuity Correction (for ABS(Z)<=2)				With Continuity Correction (for ABS(Z)<=2)				With Continuity Correction (for ABS(Z)<=2)
Upper Probability	0.5381			Upper Probability	0.6837			Upper Probability	0.7446			Upper Probability	0.8931			Upper Probability	0.6837			Upper Probability	0.5381			Upper Probability	0.4626			Upper Probability	0.9628			Upper Probability	0.02427			Upper Probability	0.4626			Upper Probability	0.1989			Upper Probability	0.7446
Lower Probability	0.5381			Lower Probability	0.3871			Lower Probability	0.3193			Lower Probability	0.1464			Lower Probability	0.3871			Lower Probability	0.5381			Lower Probability	0.611			Lower Probability	0.05515			Lower Probability	0.9846			Lower Probability	0.611			Lower Probability	0.8493			Lower Probability	0.3193
Two-sided Probability	1	Not Significant (P>0.05) (two-sided)		Two-sided Probability	0.7742	Not Significant (P>0.05) (two-sided)		Two-sided Probability	0.6386	Not Significant (P>0.05) (two-sided)		Two-sided Probability	0.2928	Not Significant (P>0.05) (two-sided)		Two-sided Probability	0.7742	Not Significant (P>0.05) (two-sided)		Two-sided Probability	1	Not Significant (P>0.05) (two-sided)		Two-sided Probability	0.9252	Not Significant (P>0.05) (two-sided)		Two-sided Probability	0.1103	Not Significant (P>0.05) (two-sided)		Two-sided Probability	0.04854	* (P<=0.05) (two-sided)		Two-sided Probability	0.9252	Not Significant (P>0.05) (two-sided)		Two-sided Probability	0.3979	Not Significant (P>0.05) (two-sided)		Two-sided Probability	0.6386	Not Significant (P>0.05) (two-sided)
Without Continuity Correction (for ABS(Z)>2)				Without Continuity Correction (for ABS(Z)>2)				Without Continuity Correction (for ABS(Z)>2)				Without Continuity Correction (for ABS(Z)>2)				Without Continuity Correction (for ABS(Z)>2)				Without Continuity Correction (for ABS(Z)>2)				Without Continuity Correction (for ABS(Z)>2)				Without Continuity Correction (for ABS(Z)>2)				Without Continuity Correction (for ABS(Z)>2)				Without Continuity Correction (for ABS(Z)>2)				Without Continuity Correction (for ABS(Z)>2)				Without Continuity Correction (for ABS(Z)>2)
Upper Probability	0.5			Upper Probability	0.649			Upper Probability	0.7135			Upper Probability	0.8744			Upper Probability	0.649			Upper Probability	0.5			Upper Probability	0.4255			Upper Probability	0.9546			Upper Probability	0.01939			Upper Probability	0.4255			Upper Probability	0.1738			Upper Probability	0.7135
Lower Probability	0.5			Lower Probability	0.351			Lower Probability	0.2865			Lower Probability	0.1256			Lower Probability	0.351			Lower Probability	0.5			Lower Probability	0.5745			Lower Probability	0.04544			Lower Probability	0.9806			Lower Probability	0.5745			Lower Probability	0.8262			Lower Probability	0.2865
Two-sided Probability	1	Not Significant (P>0.05) (two-sided)		Two-sided Probability	0.7021	Not Significant (P>0.05) (two-sided)		Two-sided Probability	0.573	Not Significant (P>0.05) (two-sided)		Two-sided Probability	0.2511	Not Significant (P>0.05) (two-sided)		Two-sided Probability	0.7021	Not Significant (P>0.05) (two-sided)		Two-sided Probability	1	Not Significant (P>0.05) (two-sided)		Two-sided Probability	0.851	Not Significant (P>0.05) (two-sided)		Two-sided Probability	0.09087	Not Significant (P>0.05) (two-sided)		Two-sided Probability	0.03878	* (P<=0.05) (two-sided)		Two-sided Probability	0.851	Not Significant (P>0.05) (two-sided)		Two-sided Probability	0.3476	Not Significant (P>0.05) (two-sided)		Two-sided Probability	0.573	Not Significant (P>0.05) (two-sided)
Exact Method(Not corrected for ties)				Exact Method(Not corrected for ties)				Exact Method(Not corrected for ties)				Exact Method(Not corrected for ties)				Exact Method(Not corrected for ties)				Exact Method(Not corrected for ties)				Exact Method(Not corrected for ties)				Exact Method(Not corrected for ties)				Exact Method(Not corrected for ties)				Exact Method(Not corrected for ties)				Exact Method(Not corrected for ties)				Exact Method(Not corrected for ties)
Upper Probability	0.6403			Upper Probability	0.5			Upper Probability	0.3597			Upper Probability	0.2347			Upper Probability	0.5			Upper Probability	0.6403			Upper Probability	0.5			Upper Probability	0.06806			Upper Probability	0.02778			Upper Probability	0.5			Upper Probability	0.2347			Upper Probability	0.3597
Lower Probability	0.3597			Lower Probability	0.5			Lower Probability	0.6403			Lower Probability	0.7653			Lower Probability	0.5			Lower Probability	0.3597			Lower Probability	0.5			Lower Probability	0.9319			Lower Probability	0.9722			Lower Probability	0.5			Lower Probability	0.7653			Lower Probability	0.6403
Two-sided Probability	0.7194	Not Significant (P>0.05) (two-sided)		Two-sided Probability	1	Not Significant (P>0.05) (two-sided)		Two-sided Probability	0.7194	Not Significant (P>0.05) (two-sided)		Two-sided Probability	0.4694	Not Significant (P>0.05) (two-sided)		Two-sided Probability	1	Not Significant (P>0.05) (two-sided)		Two-sided Probability	0.7194	Not Significant (P>0.05) (two-sided)		Two-sided Probability	1	Not Significant (P>0.05) (two-sided)		Two-sided Probability	0.1361	Not Significant (P>0.05) (two-sided)		Two-sided Probability	0.05556	Not Significant (P>0.05) (two-sided)		Two-sided Probability	1	Not Significant (P>0.05) (two-sided)		Two-sided Probability	0.4694	Not Significant (P>0.05) (two-sided)		Two-sided Probability	0.7194	Not Significant (P>0.05) (two-sided)
Glu Post-eff	T4-test 1			Glu Post-eff	T4 -test 2			Glu Post-eff	T4-test 3			Glu Post-eff	T4a-test 4			Glu Post-eff	T4b- test 4			Glu Post-eff	T4c-test 4			Glu Post-eff	TM-Cp.			Glu Post-eff	Limf-B			Glu Post-eff	Glu-B			Glu Post-eff	Norep-B			Glu Post-eff	Prol-B			Glu Post-eff	Cort-B
115.9	40			115.9	24			115.9	26			115.9	10			115.9	7			115.9	8			115.9	74.97			115.9	46.3			115.9	83			115.9	1.6			115.9	6.69			115.9	15.8
129.82	34			129.82	26			129.82	15			129.82	4			129.82	5			129.82	7			129.82	63.94			129.82	40.7			129.82	87			129.82	3.8			129.82	7.25			129.82	14.7
129.63	30			129.63	24			129.63	22			129.63	9			129.63	5			129.63	12			129.63	77.71			129.63	41			129.63	91			129.63	3.07			129.63	4.92			129.63	12.9
111	38			111	23			111	13			111	8			111	6			111	10			111	72.33			111	49.2			111	85			111	3.01			111	6.53			111	12
112	28			112	22			112	28			112	12			112	9			112	8			112	66.76			112	56.7			112	84			112	4.16			112	7.87			112	9.49
131	40			131	21			131	21			131	8			131	8			131	9			131	77.91			131	33.8			131	109			131	1.06			131	9.15			131	10.6
Nonparametric Correlation				Nonparametric Correlation				Nonparametric Correlation				Nonparametric Correlation				Nonparametric Correlation				Nonparametric Correlation				Nonparametric Correlation				Nonparametric Correlation				Nonparametric Correlation				Nonparametric Correlation				Nonparametric Correlation				Nonparametric Correlation
Spearman Rank Correlation				Spearman Rank Correlation				Spearman Rank Correlation				Spearman Rank Correlation				Spearman Rank Correlation				Spearman Rank Correlation				Spearman Rank Correlation				Spearman Rank Correlation				Spearman Rank Correlation				Spearman Rank Correlation				Spearman Rank Correlation				Spearman Rank Correlation
Statistic	78.5			Statistic	74.5			Statistic	72			Statistic	65.5			Statistic	70.5			Statistic	70.5			Statistic	80			Statistic	57			Statistic	86			Statistic	68			Statistic	81			Statistic	76
Mean	73.5			Mean	73.5			Mean	73.5			Mean	73.5			Mean	73.5			Mean	73.5			Mean	73.5			Mean	73.5			Mean	73.5			Mean	73.5			Mean	73.5			Mean	73.5
Variance	59.5			Variance	59.5			Variance	61.25			Variance	59.5			Variance	59.5			Variance	59.5			Variance	61.25			Variance	61.25			Variance	61.25			Variance	61.25			Variance	61.25			Variance	61.25
Rho (corrected for ties)	0.289886			Rho (corrected for ties)	0.0579771			Rho (corrected for ties)	-0.0857143			Rho (corrected for ties)	-0.463817			Rho (corrected for ties)	-0.173931			Rho (corrected for ties)	-0.173931			Rho (corrected for ties)	0.371429			Rho (corrected for ties)	-0.942857			Rho (corrected for ties)	0.714286			Rho (corrected for ties)	-0.314286			Rho (corrected for ties)	0.428571			Rho (corrected for ties)	0.142857
Exact Method				Exact Method				Exact Method				Exact Method				Exact Method				Exact Method				Exact Method				Exact Method				Exact Method				Exact Method				Exact Method				Exact Method
Upper Probability	0.9986			Upper Probability	0.9986			Upper Probability	0.9986			Upper Probability	0.9986			Upper Probability	0.9986			Upper Probability	0.9986			Upper Probability	0.9986			Upper Probability	0.9986			Upper Probability	0.9986			Upper Probability	0.9986			Upper Probability	0.9986			Upper Probability	0.9986
Lower Probability	0.001389			Lower Probability	0.001389			Lower Probability	0.001389			Lower Probability	0.001389			Lower Probability	0.001389			Lower Probability	0.001389			Lower Probability	0.001389			Lower Probability	0.001389			Lower Probability	0.001389			Lower Probability	0.001389			Lower Probability	0.001389			Lower Probability	0.001389
Two-sided Probability	0.002778	** (P<=0.01) (two-sided)		Two-sided Probability	0.002778	** (P<=0.01) (two-sided)		Two-sided Probability	0.002778	** (P<=0.01) (two-sided)		Two-sided Probability	0.002778	** (P<=0.01) (two-sided)		Two-sided Probability	0.002778	** (P<=0.01) (two-sided)		Two-sided Probability	0.002778	** (P<=0.01) (two-sided)		Two-sided Probability	0.002778	** (P<=0.01) (two-sided)		Two-sided Probability	0.002778	** (P<=0.01) (two-sided)		Two-sided Probability	0.002778	** (P<=0.01) (two-sided)		Two-sided Probability	0.002778	** (P<=0.01) (two-sided)		Two-sided Probability	0.002778	** (P<=0.01) (two-sided)		Two-sided Probability	0.002778	** (P<=0.01) (two-sided)
Kendall Rank Correlation				Kendall Rank Correlation				Kendall Rank Correlation				Kendall Rank Correlation				Kendall Rank Correlation				Kendall Rank Correlation				Kendall Rank Correlation				Kendall Rank Correlation				Kendall Rank Correlation				Kendall Rank Correlation				Kendall Rank Correlation				Kendall Rank Correlation
Statistic	4			Statistic	2			Statistic	-3			Statistic	-6			Statistic	-2			Statistic	-2			Statistic	5			Statistic	-13			Statistic	7			Statistic	-3			Statistic	5			Statistic	1
Mean	0			Mean	0			Mean	0			Mean	0			Mean	0			Mean	0			Mean	0			Mean	0			Mean	0			Mean	0			Mean	0			Mean	0
Variance	27.3333			Variance	27.3333			Variance	28.3333			Variance	27.3333			Variance	27.3333			Variance	27.3333			Variance	28.3333			Variance	28.3333			Variance	28.3333			Variance	28.3333			Variance	28.3333			Variance	28.3333
Tau (corrected for ties)	0.276026			Tau (corrected for ties)	0.138013			Tau (corrected for ties)	-0.2			Tau (corrected for ties)	-0.414039			Tau (corrected for ties)	-0.138013			Tau (corrected for ties)	-0.138013			Tau (corrected for ties)	0.333333			Tau (corrected for ties)	-0.866667			Tau (corrected for ties)	0.466667			Tau (corrected for ties)	-0.2			Tau (corrected for ties)	0.333333			Tau (corrected for ties)	0.0666667
Normal Approximation Method				Normal Approximation Method				Normal Approximation Method				Normal Approximation Method				Normal Approximation Method				Normal Approximation Method				Normal Approximation Method				Normal Approximation Method				Normal Approximation Method				Normal Approximation Method				Normal Approximation Method				Normal Approximation Method
Caution: the probabilities given are approximates for large N.				Caution: the probabilities given are approximates for large N.				Caution: the probabilities given are approximates for large N.				Caution: the probabilities given are approximates for large N.				Caution: the probabilities given are approximates for large N.				Caution: the probabilities given are approximates for large N.				Caution: the probabilities given are approximates for large N.				Caution: the probabilities given are approximates for large N.				Caution: the probabilities given are approximates for large N.				Caution: the probabilities given are approximates for large N.				Caution: the probabilities given are approximates for large N.				Caution: the probabilities given are approximates for large N.
Z	0.765092			Z	0.382546			Z	-0.563602			Z	-1.14764			Z	-0.382546			Z	-0.382546			Z	0.939336			Z	-2.44227			Z	1.31507			Z	-0.563602			Z	0.939336			Z	0.187867
With Continuity Correction (for ABS(Z)<=2)				With Continuity Correction (for ABS(Z)<=2)				With Continuity Correction (for ABS(Z)<=2)				With Continuity Correction (for ABS(Z)<=2)				With Continuity Correction (for ABS(Z)<=2)				With Continuity Correction (for ABS(Z)<=2)				With Continuity Correction (for ABS(Z)<=2)				With Continuity Correction (for ABS(Z)<=2)				With Continuity Correction (for ABS(Z)<=2)				With Continuity Correction (for ABS(Z)<=2)				With Continuity Correction (for ABS(Z)<=2)				With Continuity Correction (for ABS(Z)<=2)
Upper Probability	0.2516			Upper Probability	0.3871			Upper Probability	0.7446			Upper Probability	0.8931			Upper Probability	0.6837			Upper Probability	0.6837			Upper Probability	0.1989			Upper Probability	0.9944			Upper Probability	0.111			Upper Probability	0.7446			Upper Probability	0.1989			Upper Probability	0.4626
Lower Probability	0.8053			Lower Probability	0.6837			Lower Probability	0.3193			Lower Probability	0.1464			Lower Probability	0.3871			Lower Probability	0.3871			Lower Probability	0.8493			Lower Probability	0.009429			Lower Probability	0.9206			Lower Probability	0.3193			Lower Probability	0.8493			Lower Probability	0.611
Two-sided Probability	0.5032	Not Significant (P>0.05) (two-sided)		Two-sided Probability	0.7742	Not Significant (P>0.05) (two-sided)		Two-sided Probability	0.6386	Not Significant (P>0.05) (two-sided)		Two-sided Probability	0.2928	Not Significant (P>0.05) (two-sided)		Two-sided Probability	0.7742	Not Significant (P>0.05) (two-sided)		Two-sided Probability	0.7742	Not Significant (P>0.05) (two-sided)		Two-sided Probability	0.3979	Not Significant (P>0.05) (two-sided)		Two-sided Probability	0.01886	* (P<=0.05) (two-sided)		Two-sided Probability	0.222	Not Significant (P>0.05) (two-sided)		Two-sided Probability	0.6386	Not Significant (P>0.05) (two-sided)		Two-sided Probability	0.3979	Not Significant (P>0.05) (two-sided)		Two-sided Probability	0.9252	Not Significant (P>0.05) (two-sided)
Without Continuity Correction (for ABS(Z)>2)				Without Continuity Correction (for ABS(Z)>2)				Without Continuity Correction (for ABS(Z)>2)				Without Continuity Correction (for ABS(Z)>2)				Without Continuity Correction (for ABS(Z)>2)				Without Continuity Correction (for ABS(Z)>2)				Without Continuity Correction (for ABS(Z)>2)				Without Continuity Correction (for ABS(Z)>2)				Without Continuity Correction (for ABS(Z)>2)				Without Continuity Correction (for ABS(Z)>2)				Without Continuity Correction (for ABS(Z)>2)				Without Continuity Correction (for ABS(Z)>2)
Upper Probability	0.2221			Upper Probability	0.351			Upper Probability	0.7135			Upper Probability	0.8744			Upper Probability	0.649			Upper Probability	0.649			Upper Probability	0.1738			Upper Probability	0.9927			Upper Probability	0.09424			Upper Probability	0.7135			Upper Probability	0.1738			Upper Probability	0.4255
Lower Probability	0.7779			Lower Probability	0.649			Lower Probability	0.2865			Lower Probability	0.1256			Lower Probability	0.351			Lower Probability	0.351			Lower Probability	0.8262			Lower Probability	0.007298			Lower Probability	0.9058			Lower Probability	0.2865			Lower Probability	0.8262			Lower Probability	0.5745
Two-sided Probability	0.4442	Not Significant (P>0.05) (two-sided)		Two-sided Probability	0.7021	Not Significant (P>0.05) (two-sided)		Two-sided Probability	0.573	Not Significant (P>0.05) (two-sided)		Two-sided Probability	0.2511	Not Significant (P>0.05) (two-sided)		Two-sided Probability	0.7021	Not Significant (P>0.05) (two-sided)		Two-sided Probability	0.7021	Not Significant (P>0.05) (two-sided)		Two-sided Probability	0.3476	Not Significant (P>0.05) (two-sided)		Two-sided Probability	0.0146	* (P<=0.05) (two-sided)		Two-sided Probability	0.1885	Not Significant (P>0.05) (two-sided)		Two-sided Probability	0.573	Not Significant (P>0.05) (two-sided)		Two-sided Probability	0.3476	Not Significant (P>0.05) (two-sided)		Two-sided Probability	0.851	Not Significant (P>0.05) (two-sided)
Exact Method(Not corrected for ties)				Exact Method(Not corrected for ties)				Exact Method(Not corrected for ties)				Exact Method(Not corrected for ties)				Exact Method(Not corrected for ties)				Exact Method(Not corrected for ties)				Exact Method(Not corrected for ties)				Exact Method(Not corrected for ties)				Exact Method(Not corrected for ties)				Exact Method(Not corrected for ties)				Exact Method(Not corrected for ties)				Exact Method(Not corrected for ties)
Upper Probability	0.3597			Upper Probability	0.5			Upper Probability	0.3597			Upper Probability	0.2347			Upper Probability	0.5			Upper Probability	0.5			Upper Probability	0.2347			Upper Probability	0.008333			Upper Probability	0.1361			Upper Probability	0.3597			Upper Probability	0.2347			Upper Probability	0.5
Lower Probability	0.6403			Lower Probability	0.5			Lower Probability	0.6403			Lower Probability	0.7653			Lower Probability	0.5			Lower Probability	0.5			Lower Probability	0.7653			Lower Probability	0.9917			Lower Probability	0.8639			Lower Probability	0.6403			Lower Probability	0.7653			Lower Probability	0.5
Two-sided Probability	0.7194	Not Significant (P>0.05) (two-sided)		Two-sided Probability	1	Not Significant (P>0.05) (two-sided)		Two-sided Probability	0.7194	Not Significant (P>0.05) (two-sided)		Two-sided Probability	0.4694	Not Significant (P>0.05) (two-sided)		Two-sided Probability	1	Not Significant (P>0.05) (two-sided)		Two-sided Probability	1	Not Significant (P>0.05) (two-sided)		Two-sided Probability	0.4694	Not Significant (P>0.05) (two-sided)		Two-sided Probability	0.01667	* (P<=0.05) (two-sided)		Two-sided Probability	0.2722	Not Significant (P>0.05) (two-sided)		Two-sided Probability	0.7194	Not Significant (P>0.05) (two-sided)		Two-sided Probability	0.4694	Not Significant (P>0.05) (two-sided)		Two-sided Probability	1	Not Significant (P>0.05) (two-sided)
Norep Pre-eff	T4-test 1			Norep Pre-eff	T4 -test 2			Norep Pre-eff	T4-test 3			Norep Pre-eff	T4a-test 4			Norep Pre-eff	T4b- test 4			Norep Pre-eff	T4c-test 4			Norep Pre-eff	TM-Cp.			Norep Pre-eff	Limf-B			Norep Pre-eff	Glu-B			Norep Pre-eff	Norep-B			Norep Pre-eff	Prol-B			Norep Pre-eff	Cort-B
1.02	40			1.02	24			1.02	26			1.02	10			1.02	7			1.02	8			1.02	74.97			1.02	46.3			1.02	83			1.02	1.6			1.02	6.69			1.02	15.8
0.5	34			0.5	26			0.5	15			0.5	4			0.5	5			0.5	7			0.5	63.94			0.5	40.7			0.5	87			0.5	3.8			0.5	7.25			0.5	14.7
2.66	30			2.66	24			2.66	22			2.66	9			2.66	5			2.66	12			2.66	77.71			2.66	41			2.66	91			2.66	3.07			2.66	4.92			2.66	12.9
1.06	38			1.06	23			1.06	13			1.06	8			1.06	6			1.06	10			1.06	72.33			1.06	49.2			1.06	85			1.06	3.01			1.06	6.53			1.06	12
0.94	28			0.94	22			0.94	28			0.94	12			0.94	9			0.94	8			0.94	66.76			0.94	56.7			0.94	84			0.94	4.16			0.94	7.87			0.94	9.49
1.51	40			1.51	21			1.51	21			1.51	8			1.51	8			1.51	9			1.51	77.91			1.51	33.8			1.51	109			1.51	1.06			1.51	9.15			1.51	10.6
Nonparametric Correlation				Nonparametric Correlation				Nonparametric Correlation				Nonparametric Correlation				Nonparametric Correlation				Nonparametric Correlation				Nonparametric Correlation				Nonparametric Correlation				Nonparametric Correlation				Nonparametric Correlation				Nonparametric Correlation				Nonparametric Correlation
Spearman Rank Correlation				Spearman Rank Correlation				Spearman Rank Correlation				Spearman Rank Correlation				Spearman Rank Correlation				Spearman Rank Correlation				Spearman Rank Correlation				Spearman Rank Correlation				Spearman Rank Correlation				Spearman Rank Correlation				Spearman Rank Correlation				Spearman Rank Correlation
Statistic	77			Statistic	67.5			Statistic	72			Statistic	74.5			Statistic	71.5			Statistic	89.5			Statistic	89			Statistic	69			Statistic	83			Statistic	64			Statistic	67			Statistic	71
Mean	73.5			Mean	73.5			Mean	73.5			Mean	73.5			Mean	73.5			Mean	73.5			Mean	73.5			Mean	73.5			Mean	73.5			Mean	73.5			Mean	73.5			Mean	73.5
Variance	59.5			Variance	59.5			Variance	61.25			Variance	59.5			Variance	59.5			Variance	59.5			Variance	61.25			Variance	61.25			Variance	61.25			Variance	61.25			Variance	61.25			Variance	61.25
Rho (corrected for ties)	0.20292			Rho (corrected for ties)	-0.347863			Rho (corrected for ties)	-0.0857143			Rho (corrected for ties)	0.0579771			Rho (corrected for ties)	-0.115954			Rho (corrected for ties)	0.927634			Rho (corrected for ties)	0.885714			Rho (corrected for ties)	-0.257143			Rho (corrected for ties)	0.542857			Rho (corrected for ties)	-0.542857			Rho (corrected for ties)	-0.371429			Rho (corrected for ties)	-0.142857
Exact Method				Exact Method				Exact Method				Exact Method				Exact Method				Exact Method				Exact Method				Exact Method				Exact Method				Exact Method				Exact Method				Exact Method
Upper Probability	0.9986			Upper Probability	0.9986			Upper Probability	0.9986			Upper Probability	0.9986			Upper Probability	0.9986			Upper Probability	0.9986			Upper Probability	0.9986			Upper Probability	0.9986			Upper Probability	0.9986			Upper Probability	0.9986			Upper Probability	0.9986			Upper Probability	0.9986
Lower Probability	0.001389			Lower Probability	0.001389			Lower Probability	0.001389			Lower Probability	0.001389			Lower Probability	0.001389			Lower Probability	0.001389			Lower Probability	0.001389			Lower Probability	0.001389			Lower Probability	0.001389			Lower Probability	0.001389			Lower Probability	0.001389			Lower Probability	0.001389
Two-sided Probability	0.002778	** (P<=0.01) (two-sided)		Two-sided Probability	0.002778	** (P<=0.01) (two-sided)		Two-sided Probability	0.002778	** (P<=0.01) (two-sided)		Two-sided Probability	0.002778	** (P<=0.01) (two-sided)		Two-sided Probability	0.002778	** (P<=0.01) (two-sided)		Two-sided Probability	0.002778	** (P<=0.01) (two-sided)		Two-sided Probability	0.002778	** (P<=0.01) (two-sided)		Two-sided Probability	0.002778	** (P<=0.01) (two-sided)		Two-sided Probability	0.002778	** (P<=0.01) (two-sided)		Two-sided Probability	0.002778	** (P<=0.01) (two-sided)		Two-sided Probability	0.002778	** (P<=0.01) (two-sided)		Two-sided Probability	0.002778	** (P<=0.01) (two-sided)
Kendall Rank Correlation				Kendall Rank Correlation				Kendall Rank Correlation				Kendall Rank Correlation				Kendall Rank Correlation				Kendall Rank Correlation				Kendall Rank Correlation				Kendall Rank Correlation				Kendall Rank Correlation				Kendall Rank Correlation				Kendall Rank Correlation				Kendall Rank Correlation
Statistic	2			Statistic	-4			Statistic	-1			Statistic	0			Statistic	-2			Statistic	12			Statistic	11			Statistic	-3			Statistic	5			Statistic	-5			Statistic	-5			Statistic	-1
Mean	0			Mean	0			Mean	0			Mean	0			Mean	0			Mean	0			Mean	0			Mean	0			Mean	0			Mean	0			Mean	0			Mean	0
Variance	27.3333			Variance	27.3333			Variance	28.3333			Variance	27.3333			Variance	27.3333			Variance	27.3333			Variance	28.3333			Variance	28.3333			Variance	28.3333			Variance	28.3333			Variance	28.3333			Variance	28.3333
Tau (corrected for ties)	0.138013			Tau (corrected for ties)	-0.276026			Tau (corrected for ties)	-0.0666667			Tau (corrected for ties)	0			Tau (corrected for ties)	-0.138013			Tau (corrected for ties)	0.828079			Tau (corrected for ties)	0.733333			Tau (corrected for ties)	-0.2			Tau (corrected for ties)	0.333333			Tau (corrected for ties)	-0.333333			Tau (corrected for ties)	-0.333333			Tau (corrected for ties)	-0.0666667
Normal Approximation Method				Normal Approximation Method				Normal Approximation Method				Normal Approximation Method				Normal Approximation Method				Normal Approximation Method				Normal Approximation Method				Normal Approximation Method				Normal Approximation Method				Normal Approximation Method				Normal Approximation Method				Normal Approximation Method
Caution: the probabilities given are approximates for large N.				Caution: the probabilities given are approximates for large N.				Caution: the probabilities given are approximates for large N.				Caution: the probabilities given are approximates for large N.				Caution: the probabilities given are approximates for large N.				Caution: the probabilities given are approximates for large N.				Caution: the probabilities given are approximates for large N.				Caution: the probabilities given are approximates for large N.				Caution: the probabilities given are approximates for large N.				Caution: the probabilities given are approximates for large N.				Caution: the probabilities given are approximates for large N.				Caution: the probabilities given are approximates for large N.
Z	0.382546			Z	-0.765092			Z	-0.187867			Z	0			Z	-0.382546			Z	2.29528			Z	2.06654			Z	-0.563602			Z	0.939336			Z	-0.939336			Z	-0.939336			Z	-0.187867
With Continuity Correction (for ABS(Z)<=2)				With Continuity Correction (for ABS(Z)<=2)				With Continuity Correction (for ABS(Z)<=2)				With Continuity Correction (for ABS(Z)<=2)				With Continuity Correction (for ABS(Z)<=2)				With Continuity Correction (for ABS(Z)<=2)				With Continuity Correction (for ABS(Z)<=2)				With Continuity Correction (for ABS(Z)<=2)				With Continuity Correction (for ABS(Z)<=2)				With Continuity Correction (for ABS(Z)<=2)				With Continuity Correction (for ABS(Z)<=2)				With Continuity Correction (for ABS(Z)<=2)
Upper Probability	0.3871			Upper Probability	0.8053			Upper Probability	0.611			Upper Probability	0.5381			Upper Probability	0.6837			Upper Probability	0.01392			Upper Probability	0.02427			Upper Probability	0.7446			Upper Probability	0.1989			Upper Probability	0.8493			Upper Probability	0.8493			Upper Probability	0.611
Lower Probability	0.6837			Lower Probability	0.2516			Lower Probability	0.4626			Lower Probability	0.5381			Lower Probability	0.3871			Lower Probability	0.9916			Lower Probability	0.9846			Lower Probability	0.3193			Lower Probability	0.8493			Lower Probability	0.1989			Lower Probability	0.1989			Lower Probability	0.4626
Two-sided Probability	0.7742	Not Significant (P>0.05) (two-sided)		Two-sided Probability	0.5032	Not Significant (P>0.05) (two-sided)		Two-sided Probability	0.9252	Not Significant (P>0.05) (two-sided)		Two-sided Probability	1	Not Significant (P>0.05) (two-sided)		Two-sided Probability	0.7742	Not Significant (P>0.05) (two-sided)		Two-sided Probability	0.02783	* (P<=0.05) (two-sided)		Two-sided Probability	0.04854	* (P<=0.05) (two-sided)		Two-sided Probability	0.6386	Not Significant (P>0.05) (two-sided)		Two-sided Probability	0.3979	Not Significant (P>0.05) (two-sided)		Two-sided Probability	0.3979	Not Significant (P>0.05) (two-sided)		Two-sided Probability	0.3979	Not Significant (P>0.05) (two-sided)		Two-sided Probability	0.9252	Not Significant (P>0.05) (two-sided)
Without Continuity Correction (for ABS(Z)>2)				Without Continuity Correction (for ABS(Z)>2)				Without Continuity Correction (for ABS(Z)>2)				Without Continuity Correction (for ABS(Z)>2)				Without Continuity Correction (for ABS(Z)>2)				Without Continuity Correction (for ABS(Z)>2)				Without Continuity Correction (for ABS(Z)>2)				Without Continuity Correction (for ABS(Z)>2)				Without Continuity Correction (for ABS(Z)>2)				Without Continuity Correction (for ABS(Z)>2)				Without Continuity Correction (for ABS(Z)>2)				Without Continuity Correction (for ABS(Z)>2)
Upper Probability	0.351			Upper Probability	0.7779			Upper Probability	0.5745			Upper Probability	0.5			Upper Probability	0.649			Upper Probability	0.01086			Upper Probability	0.01939			Upper Probability	0.7135			Upper Probability	0.1738			Upper Probability	0.8262			Upper Probability	0.8262			Upper Probability	0.5745
Lower Probability	0.649			Lower Probability	0.2221			Lower Probability	0.4255			Lower Probability	0.5			Lower Probability	0.351			Lower Probability	0.9891			Lower Probability	0.9806			Lower Probability	0.2865			Lower Probability	0.8262			Lower Probability	0.1738			Lower Probability	0.1738			Lower Probability	0.4255
Two-sided Probability	0.7021	Not Significant (P>0.05) (two-sided)		Two-sided Probability	0.4442	Not Significant (P>0.05) (two-sided)		Two-sided Probability	0.851	Not Significant (P>0.05) (two-sided)		Two-sided Probability	1	Not Significant (P>0.05) (two-sided)		Two-sided Probability	0.7021	Not Significant (P>0.05) (two-sided)		Two-sided Probability	0.02172	* (P<=0.05) (two-sided)		Two-sided Probability	0.03878	* (P<=0.05) (two-sided)		Two-sided Probability	0.573	Not Significant (P>0.05) (two-sided)		Two-sided Probability	0.3476	Not Significant (P>0.05) (two-sided)		Two-sided Probability	0.3476	Not Significant (P>0.05) (two-sided)		Two-sided Probability	0.3476	Not Significant (P>0.05) (two-sided)		Two-sided Probability	0.851	Not Significant (P>0.05) (two-sided)
Exact Method(Not corrected for ties)				Exact Method(Not corrected for ties)				Exact Method(Not corrected for ties)				Exact Method(Not corrected for ties)				Exact Method(Not corrected for ties)				Exact Method(Not corrected for ties)				Exact Method(Not corrected for ties)				Exact Method(Not corrected for ties)				Exact Method(Not corrected for ties)				Exact Method(Not corrected for ties)				Exact Method(Not corrected for ties)				Exact Method(Not corrected for ties)
Upper Probability	0.5			Upper Probability	0.3597			Upper Probability	0.5			Upper Probability	0.6403			Upper Probability	0.5			Upper Probability	0.02778			Upper Probability	0.02778			Upper Probability	0.3597			Upper Probability	0.2347			Upper Probability	0.2347			Upper Probability	0.2347			Upper Probability	0.5
Lower Probability	0.5			Lower Probability	0.6403			Lower Probability	0.5			Lower Probability	0.3597			Lower Probability	0.5			Lower Probability	0.9722			Lower Probability	0.9722			Lower Probability	0.6403			Lower Probability	0.7653			Lower Probability	0.7653			Lower Probability	0.7653			Lower Probability	0.5
Two-sided Probability	1	Not Significant (P>0.05) (two-sided)		Two-sided Probability	0.7194	Not Significant (P>0.05) (two-sided)		Two-sided Probability	1	Not Significant (P>0.05) (two-sided)		Two-sided Probability	0.7194	Not Significant (P>0.05) (two-sided)		Two-sided Probability	1	Not Significant (P>0.05) (two-sided)		Two-sided Probability	0.05556	Not Significant (P>0.05) (two-sided)		Two-sided Probability	0.05556	Not Significant (P>0.05) (two-sided)		Two-sided Probability	0.7194	Not Significant (P>0.05) (two-sided)		Two-sided Probability	0.4694	Not Significant (P>0.05) (two-sided)		Two-sided Probability	0.4694	Not Significant (P>0.05) (two-sided)		Two-sided Probability	0.4694	Not Significant (P>0.05) (two-sided)		Two-sided Probability	1	Not Significant (P>0.05) (two-sided)
Norep Post-eff	T4-test 1			Norep Post-eff	T4 -test 2			Norep Post-eff	T4-test 3			Norep Post-eff	T4a-test 4			Norep Post-eff	T4b- test 4			Norep Post-eff	T4c-test 4			Norep Post-eff	TM-Cp.			Norep Post-eff	Limf-B			Norep Post-eff	Glu-B			Norep Post-eff	Norep-B			Norep Post-eff	Prol-B			Norep Post-eff	Cort-B
3.4	40			3.4	24			3.4	26			3.4	10			3.4	7			3.4	8			3.4	74.97			3.4	46.3			3.4	83			3.4	1.6			3.4	6.69			3.4	15.8
8.68	34			8.68	26			8.68	15			8.68	4			8.68	5			8.68	7			8.68	63.94			8.68	40.7			8.68	87			8.68	3.8			8.68	7.25			8.68	14.7
3.53	30			3.53	24			3.53	22			3.53	9			3.53	5			3.53	12			3.53	77.71			3.53	41			3.53	91			3.53	3.07			3.53	4.92			3.53	12.9
10.94	38			10.94	23			10.94	13			10.94	8			10.94	6			10.94	10			10.94	72.33			10.94	49.2			10.94	85			10.94	3.01			10.94	6.53			10.94	12
15.8	28			15.8	22			15.8	28			15.8	12			15.8	9			15.8	8			15.8	66.76			15.8	56.7			15.8	84			15.8	4.16			15.8	7.87			15.8	9.49
3.87	40			3.87	21			3.87	21			3.87	8			3.87	8			3.87	9			3.87	77.91			3.87	33.8			3.87	109			3.87	1.06			3.87	9.15			3.87	10.6
Nonparametric Correlation				Nonparametric Correlation				Nonparametric Correlation				Nonparametric Correlation				Nonparametric Correlation				Nonparametric Correlation				Nonparametric Correlation				Nonparametric Correlation				Nonparametric Correlation				Nonparametric Correlation				Nonparametric Correlation				Nonparametric Correlation
Spearman Rank Correlation				Spearman Rank Correlation				Spearman Rank Correlation				Spearman Rank Correlation				Spearman Rank Correlation				Spearman Rank Correlation				Spearman Rank Correlation				Spearman Rank Correlation				Spearman Rank Correlation				Spearman Rank Correlation				Spearman Rank Correlation				Spearman Rank Correlation
Statistic	64			Statistic	67.5			Statistic	71			Statistic	73			Statistic	79			Statistic	70.5			Statistic	63			Statistic	82			Statistic	72			Statistic	84			Statistic	79			Statistic	61
Mean	73.5			Mean	73.5			Mean	73.5			Mean	73.5			Mean	73.5			Mean	73.5			Mean	73.5			Mean	73.5			Mean	73.5			Mean	73.5			Mean	73.5			Mean	73.5
Variance	59.5			Variance	59.5			Variance	61.25			Variance	59.5			Variance	59.5			Variance	59.5			Variance	61.25			Variance	61.25			Variance	61.25			Variance	61.25			Variance	61.25			Variance	61.25
Rho (corrected for ties)	-0.550782			Rho (corrected for ties)	-0.347863			Rho (corrected for ties)	-0.142857			Rho (corrected for ties)	-0.0289886			Rho (corrected for ties)	0.318874			Rho (corrected for ties)	-0.173931			Rho (corrected for ties)	-0.6			Rho (corrected for ties)	0.485714			Rho (corrected for ties)	-0.0857143			Rho (corrected for ties)	0.6			Rho (corrected for ties)	0.314286			Rho (corrected for ties)	-0.714286
Exact Method				Exact Method				Exact Method				Exact Method				Exact Method				Exact Method				Exact Method				Exact Method				Exact Method				Exact Method				Exact Method				Exact Method
Upper Probability	0.9986			Upper Probability	0.9986			Upper Probability	0.9986			Upper Probability	0.9986			Upper Probability	0.9986			Upper Probability	0.9986			Upper Probability	0.9986			Upper Probability	0.9986			Upper Probability	0.9986			Upper Probability	0.9986			Upper Probability	0.9986			Upper Probability	0.9986
Lower Probability	0.001389			Lower Probability	0.001389			Lower Probability	0.001389			Lower Probability	0.001389			Lower Probability	0.001389			Lower Probability	0.001389			Lower Probability	0.001389			Lower Probability	0.001389			Lower Probability	0.001389			Lower Probability	0.001389			Lower Probability	0.001389			Lower Probability	0.001389
Two-sided Probability	0.002778	** (P<=0.01) (two-sided)		Two-sided Probability	0.002778	** (P<=0.01) (two-sided)		Two-sided Probability	0.002778	** (P<=0.01) (two-sided)		Two-sided Probability	0.002778	** (P<=0.01) (two-sided)		Two-sided Probability	0.002778	** (P<=0.01) (two-sided)		Two-sided Probability	0.002778	** (P<=0.01) (two-sided)		Two-sided Probability	0.002778	** (P<=0.01) (two-sided)		Two-sided Probability	0.002778	** (P<=0.01) (two-sided)		Two-sided Probability	0.002778	** (P<=0.01) (two-sided)		Two-sided Probability	0.002778	** (P<=0.01) (two-sided)		Two-sided Probability	0.002778	** (P<=0.01) (two-sided)		Two-sided Probability	0.002778	** (P<=0.01) (two-sided)
Kendall Rank Correlation				Kendall Rank Correlation				Kendall Rank Correlation				Kendall Rank Correlation				Kendall Rank Correlation				Kendall Rank Correlation				Kendall Rank Correlation				Kendall Rank Correlation				Kendall Rank Correlation				Kendall Rank Correlation				Kendall Rank Correlation				Kendall Rank Correlation
Statistic	-6			Statistic	-4			Statistic	-5			Statistic	-2			Statistic	4			Statistic	-2			Statistic	-5			Statistic	5			Statistic	-3			Statistic	7			Statistic	3			Statistic	-9
Mean	0			Mean	0			Mean	0			Mean	0			Mean	0			Mean	0			Mean	0			Mean	0			Mean	0			Mean	0			Mean	0			Mean	0
Variance	27.3333			Variance	27.3333			Variance	28.3333			Variance	27.3333			Variance	27.3333			Variance	27.3333			Variance	28.3333			Variance	28.3333			Variance	28.3333			Variance	28.3333			Variance	28.3333			Variance	28.3333
Tau (corrected for ties)	-0.414039			Tau (corrected for ties)	-0.276026			Tau (corrected for ties)	-0.333333			Tau (corrected for ties)	-0.138013			Tau (corrected for ties)	0.276026			Tau (corrected for ties)	-0.138013			Tau (corrected for ties)	-0.333333			Tau (corrected for ties)	0.333333			Tau (corrected for ties)	-0.2			Tau (corrected for ties)	0.466667			Tau (corrected for ties)	0.2			Tau (corrected for ties)	-0.6
Normal Approximation Method				Normal Approximation Method				Normal Approximation Method				Normal Approximation Method				Normal Approximation Method				Normal Approximation Method				Normal Approximation Method				Normal Approximation Method				Normal Approximation Method				Normal Approximation Method				Normal Approximation Method				Normal Approximation Method
Caution: the probabilities given are approximates for large N.				Caution: the probabilities given are approximates for large N.				Caution: the probabilities given are approximates for large N.				Caution: the probabilities given are approximates for large N.				Caution: the probabilities given are approximates for large N.				Caution: the probabilities given are approximates for large N.				Caution: the probabilities given are approximates for large N.				Caution: the probabilities given are approximates for large N.				Caution: the probabilities given are approximates for large N.				Caution: the probabilities given are approximates for large N.				Caution: the probabilities given are approximates for large N.				Caution: the probabilities given are approximates for large N.
Z	-1.14764			Z	-0.765092			Z	-0.939336			Z	-0.382546			Z	0.765092			Z	-0.382546			Z	-0.939336			Z	0.939336			Z	-0.563602			Z	1.31507			Z	0.563602			Z	-1.69081
With Continuity Correction (for ABS(Z)<=2)				With Continuity Correction (for ABS(Z)<=2)				With Continuity Correction (for ABS(Z)<=2)				With Continuity Correction (for ABS(Z)<=2)				With Continuity Correction (for ABS(Z)<=2)				With Continuity Correction (for ABS(Z)<=2)				With Continuity Correction (for ABS(Z)<=2)				With Continuity Correction (for ABS(Z)<=2)				With Continuity Correction (for ABS(Z)<=2)				With Continuity Correction (for ABS(Z)<=2)				With Continuity Correction (for ABS(Z)<=2)				With Continuity Correction (for ABS(Z)<=2)
Upper Probability	0.8931			Upper Probability	0.8053			Upper Probability	0.8493			Upper Probability	0.6837			Upper Probability	0.2516			Upper Probability	0.6837			Upper Probability	0.8493			Upper Probability	0.1989			Upper Probability	0.7446			Upper Probability	0.111			Upper Probability	0.3193			Upper Probability	0.9628
Lower Probability	0.1464			Lower Probability	0.2516			Lower Probability	0.1989			Lower Probability	0.3871			Lower Probability	0.8053			Lower Probability	0.3871			Lower Probability	0.1989			Lower Probability	0.8493			Lower Probability	0.3193			Lower Probability	0.9206			Lower Probability	0.7446			Lower Probability	0.05515
Two-sided Probability	0.2928	Not Significant (P>0.05) (two-sided)		Two-sided Probability	0.5032	Not Significant (P>0.05) (two-sided)		Two-sided Probability	0.3979	Not Significant (P>0.05) (two-sided)		Two-sided Probability	0.7742	Not Significant (P>0.05) (two-sided)		Two-sided Probability	0.5032	Not Significant (P>0.05) (two-sided)		Two-sided Probability	0.7742	Not Significant (P>0.05) (two-sided)		Two-sided Probability	0.3979	Not Significant (P>0.05) (two-sided)		Two-sided Probability	0.3979	Not Significant (P>0.05) (two-sided)		Two-sided Probability	0.6386	Not Significant (P>0.05) (two-sided)		Two-sided Probability	0.222	Not Significant (P>0.05) (two-sided)		Two-sided Probability	0.6386	Not Significant (P>0.05) (two-sided)		Two-sided Probability	0.1103	Not Significant (P>0.05) (two-sided)
Without Continuity Correction (for ABS(Z)>2)				Without Continuity Correction (for ABS(Z)>2)				Without Continuity Correction (for ABS(Z)>2)				Without Continuity Correction (for ABS(Z)>2)				Without Continuity Correction (for ABS(Z)>2)				Without Continuity Correction (for ABS(Z)>2)				Without Continuity Correction (for ABS(Z)>2)				Without Continuity Correction (for ABS(Z)>2)				Without Continuity Correction (for ABS(Z)>2)				Without Continuity Correction (for ABS(Z)>2)				Without Continuity Correction (for ABS(Z)>2)				Without Continuity Correction (for ABS(Z)>2)
Upper Probability	0.8744			Upper Probability	0.7779			Upper Probability	0.8262			Upper Probability	0.649			Upper Probability	0.2221			Upper Probability	0.649			Upper Probability	0.8262			Upper Probability	0.1738			Upper Probability	0.7135			Upper Probability	0.09424			Upper Probability	0.2865			Upper Probability	0.9546
Lower Probability	0.1256			Lower Probability	0.2221			Lower Probability	0.1738			Lower Probability	0.351			Lower Probability	0.7779			Lower Probability	0.351			Lower Probability	0.1738			Lower Probability	0.8262			Lower Probability	0.2865			Lower Probability	0.9058			Lower Probability	0.7135			Lower Probability	0.04544
Two-sided Probability	0.2511	Not Significant (P>0.05) (two-sided)		Two-sided Probability	0.4442	Not Significant (P>0.05) (two-sided)		Two-sided Probability	0.3476	Not Significant (P>0.05) (two-sided)		Two-sided Probability	0.7021	Not Significant (P>0.05) (two-sided)		Two-sided Probability	0.4442	Not Significant (P>0.05) (two-sided)		Two-sided Probability	0.7021	Not Significant (P>0.05) (two-sided)		Two-sided Probability	0.3476	Not Significant (P>0.05) (two-sided)		Two-sided Probability	0.3476	Not Significant (P>0.05) (two-sided)		Two-sided Probability	0.573	Not Significant (P>0.05) (two-sided)		Two-sided Probability	0.1885	Not Significant (P>0.05) (two-sided)		Two-sided Probability	0.573	Not Significant (P>0.05) (two-sided)		Two-sided Probability	0.09087	Not Significant (P>0.05) (two-sided)
Exact Method(Not corrected for ties)				Exact Method(Not corrected for ties)				Exact Method(Not corrected for ties)				Exact Method(Not corrected for ties)				Exact Method(Not corrected for ties)				Exact Method(Not corrected for ties)				Exact Method(Not corrected for ties)				Exact Method(Not corrected for ties)				Exact Method(Not corrected for ties)				Exact Method(Not corrected for ties)				Exact Method(Not corrected for ties)				Exact Method(Not corrected for ties)
Upper Probability	0.2347			Upper Probability	0.3597			Upper Probability	0.2347			Upper Probability	0.5			Upper Probability	0.3597			Upper Probability	0.5			Upper Probability	0.2347			Upper Probability	0.2347			Upper Probability	0.3597			Upper Probability	0.1361			Upper Probability	0.3597			Upper Probability	0.06806
Lower Probability	0.7653			Lower Probability	0.6403			Lower Probability	0.7653			Lower Probability	0.5			Lower Probability	0.6403			Lower Probability	0.5			Lower Probability	0.7653			Lower Probability	0.7653			Lower Probability	0.6403			Lower Probability	0.8639			Lower Probability	0.6403			Lower Probability	0.9319
Two-sided Probability	0.4694	Not Significant (P>0.05) (two-sided)		Two-sided Probability	0.7194	Not Significant (P>0.05) (two-sided)		Two-sided Probability	0.4694	Not Significant (P>0.05) (two-sided)		Two-sided Probability	1	Not Significant (P>0.05) (two-sided)		Two-sided Probability	0.7194	Not Significant (P>0.05) (two-sided)		Two-sided Probability	1	Not Significant (P>0.05) (two-sided)		Two-sided Probability	0.4694	Not Significant (P>0.05) (two-sided)		Two-sided Probability	0.4694	Not Significant (P>0.05) (two-sided)		Two-sided Probability	0.7194	Not Significant (P>0.05) (two-sided)		Two-sided Probability	0.2722	Not Significant (P>0.05) (two-sided)		Two-sided Probability	0.7194	Not Significant (P>0.05) (two-sided)		Two-sided Probability	0.1361	Not Significant (P>0.05) (two-sided)
E4=
Prol Pre-eff	T4-test 1			Prol Pre-eff	T4 -test 2			Prol Pre-eff	T4-test 3			Prol Pre-eff	T4a-test 4			Prol Pre-eff	T4b- test 4			Prol Pre-eff	T4c-test 4			Prol Pre-eff	TM-Cp.			Prol Pre-eff	Limf-B			Prol Pre-eff	Glu-B			Prol Pre-eff	Norep-B			Prol Pre-eff	Prol-B			Prol Pre-eff	Cort-B
10.6	40			10.6	24			10.6	26			10.6	10			10.6	7			10.6	8			10.6	74.97			10.6	46.3			10.6	83			10.6	1.6			10.6	6.69			10.6	15.8
11.2	34			11.2	26			11.2	15			11.2	4			11.2	5			11.2	7			11.2	63.94			11.2	40.7			11.2	87			11.2	3.8			11.2	7.25			11.2	14.7
7.2	30			7.2	24			7.2	22			7.2	9			7.2	5			7.2	12			7.2	77.71			7.2	41			7.2	91			7.2	3.07			7.2	4.92			7.2	12.9
5.31	38			5.31	23			5.31	13			5.31	8			5.31	6			5.31	10			5.31	72.33			5.31	49.2			5.31	85			5.31	3.01			5.31	6.53			5.31	12
7.26	28			7.26	22			7.26	28			7.26	12			7.26	9			7.26	8			7.26	66.76			7.26	56.7			7.26	84			7.26	4.16			7.26	7.87			7.26	9.49
16.5	40			16.5	21			16.5	21			16.5	8			16.5	8			16.5	9			16.5	77.91			16.5	33.8			16.5	109			16.5	1.06			16.5	9.15			16.5	10.6
Nonparametric Correlation				Nonparametric Correlation				Nonparametric Correlation				Nonparametric Correlation				Nonparametric Correlation				Nonparametric Correlation				Nonparametric Correlation				Nonparametric Correlation				Nonparametric Correlation				Nonparametric Correlation				Nonparametric Correlation				Nonparametric Correlation
Spearman Rank Correlation				Spearman Rank Correlation				Spearman Rank Correlation				Spearman Rank Correlation				Spearman Rank Correlation				Spearman Rank Correlation				Spearman Rank Correlation				Spearman Rank Correlation				Spearman Rank Correlation				Spearman Rank Correlation				Spearman Rank Correlation				Spearman Rank Correlation
Statistic	81			Statistic	72			Statistic	75			Statistic	68.5			Statistic	77.5			Statistic	63.5			Statistic	76			Statistic	61			Statistic	79			Statistic	68			Statistic	87			Statistic	75
Mean	73.5			Mean	73.5			Mean	73.5			Mean	73.5			Mean	73.5			Mean	73.5			Mean	73.5			Mean	73.5			Mean	73.5			Mean	73.5			Mean	73.5			Mean	73.5
Variance	59.5			Variance	59.5			Variance	61.25			Variance	59.5			Variance	59.5			Variance	59.5			Variance	61.25			Variance	61.25			Variance	61.25			Variance	61.25			Variance	61.25			Variance	61.25
Rho (corrected for ties)	0.434828			Rho (corrected for ties)	-0.0869657			Rho (corrected for ties)	0.0857143			Rho (corrected for ties)	-0.289886			Rho (corrected for ties)	0.231908			Rho (corrected for ties)	-0.579771			Rho (corrected for ties)	0.142857			Rho (corrected for ties)	-0.714286			Rho (corrected for ties)	0.314286			Rho (corrected for ties)	-0.314286			Rho (corrected for ties)	0.771429			Rho (corrected for ties)	0.0857143
Exact Method				Exact Method				Exact Method				Exact Method				Exact Method				Exact Method				Exact Method				Exact Method				Exact Method				Exact Method				Exact Method				Exact Method
Upper Probability	0.9986			Upper Probability	0.9986			Upper Probability	0.9986			Upper Probability	0.9986			Upper Probability	0.9986			Upper Probability	0.9986			Upper Probability	0.9986			Upper Probability	0.9986			Upper Probability	0.9986			Upper Probability	0.9986			Upper Probability	0.9986			Upper Probability	0.9986
Lower Probability	0.001389			Lower Probability	0.001389			Lower Probability	0.001389			Lower Probability	0.001389			Lower Probability	0.001389			Lower Probability	0.001389			Lower Probability	0.001389			Lower Probability	0.001389			Lower Probability	0.001389			Lower Probability	0.001389			Lower Probability	0.001389			Lower Probability	0.001389
Two-sided Probability	0.002778	** (P<=0.01) (two-sided)		Two-sided Probability	0.002778	** (P<=0.01) (two-sided)		Two-sided Probability	0.002778	** (P<=0.01) (two-sided)		Two-sided Probability	0.002778	** (P<=0.01) (two-sided)		Two-sided Probability	0.002778	** (P<=0.01) (two-sided)		Two-sided Probability	0.002778	** (P<=0.01) (two-sided)		Two-sided Probability	0.002778	** (P<=0.01) (two-sided)		Two-sided Probability	0.002778	** (P<=0.01) (two-sided)		Two-sided Probability	0.002778	** (P<=0.01) (two-sided)		Two-sided Probability	0.002778	** (P<=0.01) (two-sided)		Two-sided Probability	0.002778	** (P<=0.01) (two-sided)		Two-sided Probability	0.002778	** (P<=0.01) (two-sided)
Kendall Rank Correlation				Kendall Rank Correlation				Kendall Rank Correlation				Kendall Rank Correlation				Kendall Rank Correlation				Kendall Rank Correlation				Kendall Rank Correlation				Kendall Rank Correlation				Kendall Rank Correlation				Kendall Rank Correlation				Kendall Rank Correlation				Kendall Rank Correlation
Statistic	4			Statistic	0			Statistic	1			Statistic	-2			Statistic	2			Statistic	-6			Statistic	1			Statistic	-9			Statistic	3			Statistic	-3			Statistic	9			Statistic	1
Mean	0			Mean	0			Mean	0			Mean	0			Mean	0			Mean	0			Mean	0			Mean	0			Mean	0			Mean	0			Mean	0			Mean	0
Variance	27.3333			Variance	27.3333			Variance	28.3333			Variance	27.3333			Variance	27.3333			Variance	27.3333			Variance	28.3333			Variance	28.3333			Variance	28.3333			Variance	28.3333			Variance	28.3333			Variance	28.3333
Tau (corrected for ties)	0.276026			Tau (corrected for ties)	0			Tau (corrected for ties)	0.0666667			Tau (corrected for ties)	-0.138013			Tau (corrected for ties)	0.138013			Tau (corrected for ties)	-0.414039			Tau (corrected for ties)	0.0666667			Tau (corrected for ties)	-0.6			Tau (corrected for ties)	0.2			Tau (corrected for ties)	-0.2			Tau (corrected for ties)	0.6			Tau (corrected for ties)	0.0666667
Normal Approximation Method				Normal Approximation Method				Normal Approximation Method				Normal Approximation Method				Normal Approximation Method				Normal Approximation Method				Normal Approximation Method				Normal Approximation Method				Normal Approximation Method				Normal Approximation Method				Normal Approximation Method				Normal Approximation Method
Caution: the probabilities given are approximates for large N.				Caution: the probabilities given are approximates for large N.				Caution: the probabilities given are approximates for large N.				Caution: the probabilities given are approximates for large N.				Caution: the probabilities given are approximates for large N.				Caution: the probabilities given are approximates for large N.				Caution: the probabilities given are approximates for large N.				Caution: the probabilities given are approximates for large N.				Caution: the probabilities given are approximates for large N.				Caution: the probabilities given are approximates for large N.				Caution: the probabilities given are approximates for large N.				Caution: the probabilities given are approximates for large N.
Z	0.765092			Z	0			Z	0.187867			Z	-0.382546			Z	0.382546			Z	-1.14764			Z	0.187867			Z	-1.69081			Z	0.563602			Z	-0.563602			Z	1.69081			Z	0.187867
With Continuity Correction (for ABS(Z)<=2)				With Continuity Correction (for ABS(Z)<=2)				With Continuity Correction (for ABS(Z)<=2)				With Continuity Correction (for ABS(Z)<=2)				With Continuity Correction (for ABS(Z)<=2)				With Continuity Correction (for ABS(Z)<=2)				With Continuity Correction (for ABS(Z)<=2)				With Continuity Correction (for ABS(Z)<=2)				With Continuity Correction (for ABS(Z)<=2)				With Continuity Correction (for ABS(Z)<=2)				With Continuity Correction (for ABS(Z)<=2)				With Continuity Correction (for ABS(Z)<=2)
Upper Probability	0.2516			Upper Probability	0.5381			Upper Probability	0.4626			Upper Probability	0.6837			Upper Probability	0.3871			Upper Probability	0.8931			Upper Probability	0.4626			Upper Probability	0.9628			Upper Probability	0.3193			Upper Probability	0.7446			Upper Probability	0.05515			Upper Probability	0.4626
Lower Probability	0.8053			Lower Probability	0.5381			Lower Probability	0.611			Lower Probability	0.3871			Lower Probability	0.6837			Lower Probability	0.1464			Lower Probability	0.611			Lower Probability	0.05515			Lower Probability	0.7446			Lower Probability	0.3193			Lower Probability	0.9628			Lower Probability	0.611
Two-sided Probability	0.5032	Not Significant (P>0.05) (two-sided)		Two-sided Probability	1	Not Significant (P>0.05) (two-sided)		Two-sided Probability	0.9252	Not Significant (P>0.05) (two-sided)		Two-sided Probability	0.7742	Not Significant (P>0.05) (two-sided)		Two-sided Probability	0.7742	Not Significant (P>0.05) (two-sided)		Two-sided Probability	0.2928	Not Significant (P>0.05) (two-sided)		Two-sided Probability	0.9252	Not Significant (P>0.05) (two-sided)		Two-sided Probability	0.1103	Not Significant (P>0.05) (two-sided)		Two-sided Probability	0.6386	Not Significant (P>0.05) (two-sided)		Two-sided Probability	0.6386	Not Significant (P>0.05) (two-sided)		Two-sided Probability	0.1103	Not Significant (P>0.05) (two-sided)		Two-sided Probability	0.9252	Not Significant (P>0.05) (two-sided)
Without Continuity Correction (for ABS(Z)>2)				Without Continuity Correction (for ABS(Z)>2)				Without Continuity Correction (for ABS(Z)>2)				Without Continuity Correction (for ABS(Z)>2)				Without Continuity Correction (for ABS(Z)>2)				Without Continuity Correction (for ABS(Z)>2)				Without Continuity Correction (for ABS(Z)>2)				Without Continuity Correction (for ABS(Z)>2)				Without Continuity Correction (for ABS(Z)>2)				Without Continuity Correction (for ABS(Z)>2)				Without Continuity Correction (for ABS(Z)>2)				Without Continuity Correction (for ABS(Z)>2)
Upper Probability	0.2221			Upper Probability	0.5			Upper Probability	0.4255			Upper Probability	0.649			Upper Probability	0.351			Upper Probability	0.8744			Upper Probability	0.4255			Upper Probability	0.9546			Upper Probability	0.2865			Upper Probability	0.7135			Upper Probability	0.04544			Upper Probability	0.4255
Lower Probability	0.7779			Lower Probability	0.5			Lower Probability	0.5745			Lower Probability	0.351			Lower Probability	0.649			Lower Probability	0.1256			Lower Probability	0.5745			Lower Probability	0.04544			Lower Probability	0.7135			Lower Probability	0.2865			Lower Probability	0.9546			Lower Probability	0.5745
Two-sided Probability	0.4442	Not Significant (P>0.05) (two-sided)		Two-sided Probability	1	Not Significant (P>0.05) (two-sided)		Two-sided Probability	0.851	Not Significant (P>0.05) (two-sided)		Two-sided Probability	0.7021	Not Significant (P>0.05) (two-sided)		Two-sided Probability	0.7021	Not Significant (P>0.05) (two-sided)		Two-sided Probability	0.2511	Not Significant (P>0.05) (two-sided)		Two-sided Probability	0.851	Not Significant (P>0.05) (two-sided)		Two-sided Probability	0.09087	Not Significant (P>0.05) (two-sided)		Two-sided Probability	0.573	Not Significant (P>0.05) (two-sided)		Two-sided Probability	0.573	Not Significant (P>0.05) (two-sided)		Two-sided Probability	0.09087	Not Significant (P>0.05) (two-sided)		Two-sided Probability	0.851	Not Significant (P>0.05) (two-sided)
Exact Method(Not corrected for ties)				Exact Method(Not corrected for ties)				Exact Method(Not corrected for ties)				Exact Method(Not corrected for ties)				Exact Method(Not corrected for ties)				Exact Method(Not corrected for ties)				Exact Method(Not corrected for ties)				Exact Method(Not corrected for ties)				Exact Method(Not corrected for ties)				Exact Method(Not corrected for ties)				Exact Method(Not corrected for ties)				Exact Method(Not corrected for ties)
Upper Probability	0.3597			Upper Probability	0.6403			Upper Probability	0.5			Upper Probability	0.5			Upper Probability	0.5			Upper Probability	0.2347			Upper Probability	0.5			Upper Probability	0.06806			Upper Probability	0.3597			Upper Probability	0.3597			Upper Probability	0.06806			Upper Probability	0.5
Lower Probability	0.6403			Lower Probability	0.3597			Lower Probability	0.5			Lower Probability	0.5			Lower Probability	0.5			Lower Probability	0.7653			Lower Probability	0.5			Lower Probability	0.9319			Lower Probability	0.6403			Lower Probability	0.6403			Lower Probability	0.9319			Lower Probability	0.5
Two-sided Probability	0.7194	Not Significant (P>0.05) (two-sided)		Two-sided Probability	0.7194	Not Significant (P>0.05) (two-sided)		Two-sided Probability	1	Not Significant (P>0.05) (two-sided)		Two-sided Probability	1	Not Significant (P>0.05) (two-sided)		Two-sided Probability	1	Not Significant (P>0.05) (two-sided)		Two-sided Probability	0.4694	Not Significant (P>0.05) (two-sided)		Two-sided Probability	1	Not Significant (P>0.05) (two-sided)		Two-sided Probability	0.1361	Not Significant (P>0.05) (two-sided)		Two-sided Probability	0.7194	Not Significant (P>0.05) (two-sided)		Two-sided Probability	0.7194	Not Significant (P>0.05) (two-sided)		Two-sided Probability	0.1361	Not Significant (P>0.05) (two-sided)		Two-sided Probability	1	Not Significant (P>0.05) (two-sided)
Prol Post-eff	T4-test 1			Prol Post-eff	T4 -test 2			Prol Post-eff	T4-test 3			Prol Post-eff	T4a-test 4			Prol Post-eff	T4b- test 4			Prol Post-eff	T4c-test 4			Prol Post-eff	TM-Cp.			Prol Post-eff	Limf-B			Prol Post-eff	Glu-B			Prol Post-eff	Norep-B			Prol Post-eff	Prol-B			Prol Post-eff	Cort-B
13	40			13	24			13	26			13	10			13	7			13	8			13	74.97			13	46.3			13	83			13	1.6			13	6.69			13	15.8
16	34			16	26			16	15			16	4			16	5			16	7			16	63.94			16	40.7			16	87			16	3.8			16	7.25			16	14.7
9.92	30			9.92	24			9.92	22			9.92	9			9.92	5			9.92	12			9.92	77.71			9.92	41			9.92	91			9.92	3.07			9.92	4.92			9.92	12.9
7.06	38			7.06	23			7.06	13			7.06	8			7.06	6			7.06	10			7.06	72.33			7.06	49.2			7.06	85			7.06	3.01			7.06	6.53			7.06	12
33.1	28			33.1	22			33.1	28			33.1	12			33.1	9			33.1	8			33.1	66.76			33.1	56.7			33.1	84			33.1	4.16			33.1	7.87			33.1	9.49
13.3	40			13.3	21			13.3	21			13.3	8			13.3	8			13.3	9			13.3	77.91			13.3	33.8			13.3	109			13.3	1.06			13.3	9.15			13.3	10.6
Nonparametric Correlation				Nonparametric Correlation				Nonparametric Correlation				Nonparametric Correlation				Nonparametric Correlation				Nonparametric Correlation				Nonparametric Correlation				Nonparametric Correlation				Nonparametric Correlation				Nonparametric Correlation				Nonparametric Correlation				Nonparametric Correlation
Spearman Rank Correlation				Spearman Rank Correlation				Spearman Rank Correlation				Spearman Rank Correlation				Spearman Rank Correlation				Spearman Rank Correlation				Spearman Rank Correlation				Spearman Rank Correlation				Spearman Rank Correlation				Spearman Rank Correlation				Spearman Rank Correlation				Spearman Rank Correlation
Statistic	67.5			Statistic	71.5			Statistic	82			Statistic	76.5			Statistic	81.5			Statistic	60.5			Statistic	66			Statistic	73			Statistic	72			Statistic	82			Statistic	87			Statistic	68
Mean	73.5			Mean	73.5			Mean	73.5			Mean	73.5			Mean	73.5			Mean	73.5			Mean	73.5			Mean	73.5			Mean	73.5			Mean	73.5			Mean	73.5			Mean	73.5
Variance	59.5			Variance	59.5			Variance	61.25			Variance	59.5			Variance	59.5			Variance	59.5			Variance	61.25			Variance	61.25			Variance	61.25			Variance	61.25			Variance	61.25			Variance	61.25
Rho (corrected for ties)	-0.347863			Rho (corrected for ties)	-0.115954			Rho (corrected for ties)	0.485714			Rho (corrected for ties)	0.173931			Rho (corrected for ties)	0.463817			Rho (corrected for ties)	-0.753702			Rho (corrected for ties)	-0.428571			Rho (corrected for ties)	-0.0285714			Rho (corrected for ties)	-0.0857143			Rho (corrected for ties)	0.485714			Rho (corrected for ties)	0.771429			Rho (corrected for ties)	-0.314286
Exact Method				Exact Method				Exact Method				Exact Method				Exact Method				Exact Method				Exact Method				Exact Method				Exact Method				Exact Method				Exact Method				Exact Method
Upper Probability	0.9986			Upper Probability	0.9986			Upper Probability	0.9986			Upper Probability	0.9986			Upper Probability	0.9986			Upper Probability	0.9986			Upper Probability	0.9986			Upper Probability	0.9986			Upper Probability	0.9986			Upper Probability	0.9986			Upper Probability	0.9986			Upper Probability	0.9986
Lower Probability	0.001389			Lower Probability	0.001389			Lower Probability	0.001389			Lower Probability	0.001389			Lower Probability	0.001389			Lower Probability	0.001389			Lower Probability	0.001389			Lower Probability	0.001389			Lower Probability	0.001389			Lower Probability	0.001389			Lower Probability	0.001389			Lower Probability	0.001389
Two-sided Probability	0.002778	** (P<=0.01) (two-sided)		Two-sided Probability	0.002778	** (P<=0.01) (two-sided)		Two-sided Probability	0.002778	** (P<=0.01) (two-sided)		Two-sided Probability	0.002778	** (P<=0.01) (two-sided)		Two-sided Probability	0.002778	** (P<=0.01) (two-sided)		Two-sided Probability	0.002778	** (P<=0.01) (two-sided)		Two-sided Probability	0.002778	** (P<=0.01) (two-sided)		Two-sided Probability	0.002778	** (P<=0.01) (two-sided)		Two-sided Probability	0.002778	** (P<=0.01) (two-sided)		Two-sided Probability	0.002778	** (P<=0.01) (two-sided)		Two-sided Probability	0.002778	** (P<=0.01) (two-sided)		Two-sided Probability	0.002778	** (P<=0.01) (two-sided)
Kendall Rank Correlation				Kendall Rank Correlation				Kendall Rank Correlation				Kendall Rank Correlation				Kendall Rank Correlation				Kendall Rank Correlation				Kendall Rank Correlation				Kendall Rank Correlation				Kendall Rank Correlation				Kendall Rank Correlation				Kendall Rank Correlation				Kendall Rank Correlation
Statistic	-4			Statistic	0			Statistic	5			Statistic	2			Statistic	6			Statistic	-8			Statistic	-3			Statistic	-1			Statistic	-1			Statistic	5			Statistic	9			Statistic	-3
Mean	0			Mean	0			Mean	0			Mean	0			Mean	0			Mean	0			Mean	0			Mean	0			Mean	0			Mean	0			Mean	0			Mean	0
Variance	27.3333			Variance	27.3333			Variance	28.3333			Variance	27.3333			Variance	27.3333			Variance	27.3333			Variance	28.3333			Variance	28.3333			Variance	28.3333			Variance	28.3333			Variance	28.3333			Variance	28.3333
Tau (corrected for ties)	-0.276026			Tau (corrected for ties)	0			Tau (corrected for ties)	0.333333			Tau (corrected for ties)	0.138013			Tau (corrected for ties)	0.414039			Tau (corrected for ties)	-0.552052			Tau (corrected for ties)	-0.2			Tau (corrected for ties)	-0.0666667			Tau (corrected for ties)	-0.0666667			Tau (corrected for ties)	0.333333			Tau (corrected for ties)	0.6			Tau (corrected for ties)	-0.2
Normal Approximation Method				Normal Approximation Method				Normal Approximation Method				Normal Approximation Method				Normal Approximation Method				Normal Approximation Method				Normal Approximation Method				Normal Approximation Method				Normal Approximation Method				Normal Approximation Method				Normal Approximation Method				Normal Approximation Method
Caution: the probabilities given are approximates for large N.				Caution: the probabilities given are approximates for large N.				Caution: the probabilities given are approximates for large N.				Caution: the probabilities given are approximates for large N.				Caution: the probabilities given are approximates for large N.				Caution: the probabilities given are approximates for large N.				Caution: the probabilities given are approximates for large N.				Caution: the probabilities given are approximates for large N.				Caution: the probabilities given are approximates for large N.				Caution: the probabilities given are approximates for large N.				Caution: the probabilities given are approximates for large N.				Caution: the probabilities given are approximates for large N.
Z	-0.765092			Z	0			Z	0.939336			Z	0.382546			Z	1.14764			Z	-1.53018			Z	-0.563602			Z	-0.187867			Z	-0.187867			Z	0.939336			Z	1.69081			Z	-0.563602
With Continuity Correction (for ABS(Z)<=2)				With Continuity Correction (for ABS(Z)<=2)				With Continuity Correction (for ABS(Z)<=2)				With Continuity Correction (for ABS(Z)<=2)				With Continuity Correction (for ABS(Z)<=2)				With Continuity Correction (for ABS(Z)<=2)				With Continuity Correction (for ABS(Z)<=2)				With Continuity Correction (for ABS(Z)<=2)				With Continuity Correction (for ABS(Z)<=2)				With Continuity Correction (for ABS(Z)<=2)				With Continuity Correction (for ABS(Z)<=2)				With Continuity Correction (for ABS(Z)<=2)
Upper Probability	0.8053			Upper Probability	0.5381			Upper Probability	0.1989			Upper Probability	0.3871			Upper Probability	0.1464			Upper Probability	0.948			Upper Probability	0.7446			Upper Probability	0.611			Upper Probability	0.611			Upper Probability	0.1989			Upper Probability	0.05515			Upper Probability	0.7446
Lower Probability	0.2516			Lower Probability	0.5381			Lower Probability	0.8493			Lower Probability	0.6837			Lower Probability	0.8931			Lower Probability	0.07571			Lower Probability	0.3193			Lower Probability	0.4626			Lower Probability	0.4626			Lower Probability	0.8493			Lower Probability	0.9628			Lower Probability	0.3193
Two-sided Probability	0.5032	Not Significant (P>0.05) (two-sided)		Two-sided Probability	1	Not Significant (P>0.05) (two-sided)		Two-sided Probability	0.3979	Not Significant (P>0.05) (two-sided)		Two-sided Probability	0.7742	Not Significant (P>0.05) (two-sided)		Two-sided Probability	0.2928	Not Significant (P>0.05) (two-sided)		Two-sided Probability	0.1514	Not Significant (P>0.05) (two-sided)		Two-sided Probability	0.6386	Not Significant (P>0.05) (two-sided)		Two-sided Probability	0.9252	Not Significant (P>0.05) (two-sided)		Two-sided Probability	0.9252	Not Significant (P>0.05) (two-sided)		Two-sided Probability	0.3979	Not Significant (P>0.05) (two-sided)		Two-sided Probability	0.1103	Not Significant (P>0.05) (two-sided)		Two-sided Probability	0.6386	Not Significant (P>0.05) (two-sided)
Without Continuity Correction (for ABS(Z)>2)				Without Continuity Correction (for ABS(Z)>2)				Without Continuity Correction (for ABS(Z)>2)				Without Continuity Correction (for ABS(Z)>2)				Without Continuity Correction (for ABS(Z)>2)				Without Continuity Correction (for ABS(Z)>2)				Without Continuity Correction (for ABS(Z)>2)				Without Continuity Correction (for ABS(Z)>2)				Without Continuity Correction (for ABS(Z)>2)				Without Continuity Correction (for ABS(Z)>2)				Without Continuity Correction (for ABS(Z)>2)				Without Continuity Correction (for ABS(Z)>2)
Upper Probability	0.7779			Upper Probability	0.5			Upper Probability	0.1738			Upper Probability	0.351			Upper Probability	0.1256			Upper Probability	0.937			Upper Probability	0.7135			Upper Probability	0.5745			Upper Probability	0.5745			Upper Probability	0.1738			Upper Probability	0.04544			Upper Probability	0.7135
Lower Probability	0.2221			Lower Probability	0.5			Lower Probability	0.8262			Lower Probability	0.649			Lower Probability	0.8744			Lower Probability	0.06299			Lower Probability	0.2865			Lower Probability	0.4255			Lower Probability	0.4255			Lower Probability	0.8262			Lower Probability	0.9546			Lower Probability	0.2865
Two-sided Probability	0.4442	Not Significant (P>0.05) (two-sided)		Two-sided Probability	1	Not Significant (P>0.05) (two-sided)		Two-sided Probability	0.3476	Not Significant (P>0.05) (two-sided)		Two-sided Probability	0.7021	Not Significant (P>0.05) (two-sided)		Two-sided Probability	0.2511	Not Significant (P>0.05) (two-sided)		Two-sided Probability	0.126	Not Significant (P>0.05) (two-sided)		Two-sided Probability	0.573	Not Significant (P>0.05) (two-sided)		Two-sided Probability	0.851	Not Significant (P>0.05) (two-sided)		Two-sided Probability	0.851	Not Significant (P>0.05) (two-sided)		Two-sided Probability	0.3476	Not Significant (P>0.05) (two-sided)		Two-sided Probability	0.09087	Not Significant (P>0.05) (two-sided)		Two-sided Probability	0.573	Not Significant (P>0.05) (two-sided)
Exact Method(Not corrected for ties)				Exact Method(Not corrected for ties)				Exact Method(Not corrected for ties)				Exact Method(Not corrected for ties)				Exact Method(Not corrected for ties)				Exact Method(Not corrected for ties)				Exact Method(Not corrected for ties)				Exact Method(Not corrected for ties)				Exact Method(Not corrected for ties)				Exact Method(Not corrected for ties)				Exact Method(Not corrected for ties)				Exact Method(Not corrected for ties)
Upper Probability	0.3597			Upper Probability	0.6403			Upper Probability	0.2347			Upper Probability	0.5			Upper Probability	0.2347			Upper Probability	0.1361			Upper Probability	0.3597			Upper Probability	0.5			Upper Probability	0.5			Upper Probability	0.2347			Upper Probability	0.06806			Upper Probability	0.3597
Lower Probability	0.6403			Lower Probability	0.3597			Lower Probability	0.7653			Lower Probability	0.5			Lower Probability	0.7653			Lower Probability	0.8639			Lower Probability	0.6403			Lower Probability	0.5			Lower Probability	0.5			Lower Probability	0.7653			Lower Probability	0.9319			Lower Probability	0.6403
Two-sided Probability	0.7194	Not Significant (P>0.05) (two-sided)		Two-sided Probability	0.7194	Not Significant (P>0.05) (two-sided)		Two-sided Probability	0.4694	Not Significant (P>0.05) (two-sided)		Two-sided Probability	1	Not Significant (P>0.05) (two-sided)		Two-sided Probability	0.4694	Not Significant (P>0.05) (two-sided)		Two-sided Probability	0.2722	Not Significant (P>0.05) (two-sided)		Two-sided Probability	0.7194	Not Significant (P>0.05) (two-sided)		Two-sided Probability	1	Not Significant (P>0.05) (two-sided)		Two-sided Probability	1	Not Significant (P>0.05) (two-sided)		Two-sided Probability	0.4694	Not Significant (P>0.05) (two-sided)		Two-sided Probability	0.1361	Not Significant (P>0.05) (two-sided)		Two-sided Probability	0.7194	Not Significant (P>0.05) (two-sided)
Cort pre-eff	T4-test 1			Cort pre-eff	T4 -test 2			Cort pre-eff	T4-test 3			Cort pre-eff	T4a-test 4			Cort pre-eff	T4b- test 4			Cort pre-eff	T4c-test 4			Cort pre-eff	TM-Cp.			Cort pre-eff	Limf-B			Cort pre-eff	Glu-B			Cort pre-eff	Norep-B			Cort pre-eff	Prol-B			Cort pre-eff	Cort-B
11.8	40			11.8	24			11.8	26			11.8	10			11.8	7			11.8	8			11.8	74.97			11.8	46.3			11.8	83			11.8	1.6			11.8	6.69			11.8	15.8
13.4	34			13.4	26			13.4	15			13.4	4			13.4	5			13.4	7			13.4	63.94			13.4	40.7			13.4	87			13.4	3.8			13.4	7.25			13.4	14.7
11.8	30			11.8	24			11.8	22			11.8	9			11.8	5			11.8	12			11.8	77.71			11.8	41			11.8	91			11.8	3.07			11.8	4.92			11.8	12.9
8.96	38			8.96	23			8.96	13			8.96	8			8.96	6			8.96	10			8.96	72.33			8.96	49.2			8.96	85			8.96	3.01			8.96	6.53			8.96	12
7.52	28			7.52	22			7.52	28			7.52	12			7.52	9			7.52	8			7.52	66.76			7.52	56.7			7.52	84			7.52	4.16			7.52	7.87			7.52	9.49
13.2	40			13.2	21			13.2	21			13.2	8			13.2	8			13.2	9			13.2	77.91			13.2	33.8			13.2	109			13.2	1.06			13.2	9.15			13.2	10.6
Nonparametric Correlation				Nonparametric Correlation				Nonparametric Correlation				Nonparametric Correlation				Nonparametric Correlation				Nonparametric Correlation				Nonparametric Correlation				Nonparametric Correlation				Nonparametric Correlation				Nonparametric Correlation				Nonparametric Correlation				Nonparametric Correlation
Spearman Rank Correlation				Spearman Rank Correlation				Spearman Rank Correlation				Spearman Rank Correlation				Spearman Rank Correlation				Spearman Rank Correlation				Spearman Rank Correlation				Spearman Rank Correlation				Spearman Rank Correlation				Spearman Rank Correlation				Spearman Rank Correlation				Spearman Rank Correlation
Statistic	80.75			Statistic	80.5			Statistic	66.5			Statistic	61			Statistic	65.25			Statistic	68.25			Statistic	75.5			Statistic	57.5			Statistic	83			Statistic	68			Statistic	77			Statistic	82
Mean	73.5			Mean	73.5			Mean	73.5			Mean	73.5			Mean	73.5			Mean	73.5			Mean	73.5			Mean	73.5			Mean	73.5			Mean	73.5			Mean	73.5			Mean	73.5
Variance	57.8			Variance	57.8			Variance	59.5			Variance	57.8			Variance	57.8			Variance	57.8			Variance	59.5			Variance	59.5			Variance	59.5			Variance	59.5			Variance	59.5			Variance	59.5
Rho (corrected for ties)	0.426471			Rho (corrected for ties)	0.411765			Rho (corrected for ties)	-0.40584			Rho (corrected for ties)	-0.735294			Rho (corrected for ties)	-0.485294			Rho (corrected for ties)	-0.308824			Rho (corrected for ties)	0.115954			Rho (corrected for ties)	-0.927634			Rho (corrected for ties)	0.550782			Rho (corrected for ties)	-0.318874			Rho (corrected for ties)	0.20292			Rho (corrected for ties)	0.492805
Exact Method				Exact Method				Exact Method				Exact Method				Exact Method				Exact Method				Exact Method				Exact Method				Exact Method				Exact Method				Exact Method				Exact Method
Upper Probability	0.9986			Upper Probability	0.9986			Upper Probability	0.9986			Upper Probability	0.9986			Upper Probability	0.9986			Upper Probability	0.9986			Upper Probability	0.9986			Upper Probability	0.9986			Upper Probability	0.9986			Upper Probability	0.9986			Upper Probability	0.9986			Upper Probability	0.9986
Lower Probability	0.001389			Lower Probability	0.001389			Lower Probability	0.001389			Lower Probability	0.001389			Lower Probability	0.001389			Lower Probability	0.001389			Lower Probability	0.001389			Lower Probability	0.001389			Lower Probability	0.001389			Lower Probability	0.001389			Lower Probability	0.001389			Lower Probability	0.001389
Two-sided Probability	0.002778	** (P<=0.01) (two-sided)		Two-sided Probability	0.002778	** (P<=0.01) (two-sided)		Two-sided Probability	0.002778	** (P<=0.01) (two-sided)		Two-sided Probability	0.002778	** (P<=0.01) (two-sided)		Two-sided Probability	0.002778	** (P<=0.01) (two-sided)		Two-sided Probability	0.002778	** (P<=0.01) (two-sided)		Two-sided Probability	0.002778	** (P<=0.01) (two-sided)		Two-sided Probability	0.002778	** (P<=0.01) (two-sided)		Two-sided Probability	0.002778	** (P<=0.01) (two-sided)		Two-sided Probability	0.002778	** (P<=0.01) (two-sided)		Two-sided Probability	0.002778	** (P<=0.01) (two-sided)		Two-sided Probability	0.002778	** (P<=0.01) (two-sided)
Kendall Rank Correlation				Kendall Rank Correlation				Kendall Rank Correlation				Kendall Rank Correlation				Kendall Rank Correlation				Kendall Rank Correlation				Kendall Rank Correlation				Kendall Rank Correlation				Kendall Rank Correlation				Kendall Rank Correlation				Kendall Rank Correlation				Kendall Rank Correlation
Statistic	5			Statistic	6			Statistic	-6			Statistic	-9			Statistic	-5			Statistic	-3			Statistic	4			Statistic	-12			Statistic	6			Statistic	-4			Statistic	2			Statistic	6
Mean	0			Mean	0			Mean	0			Mean	0			Mean	0			Mean	0			Mean	0			Mean	0			Mean	0			Mean	0			Mean	0			Mean	0
Variance	26.4			Variance	26.4			Variance	27.3333			Variance	26.4			Variance	26.4			Variance	26.4			Variance	27.3333			Variance	27.3333			Variance	27.3333			Variance	27.3333			Variance	27.3333			Variance	27.3333
Tau (corrected for ties)	0.357143			Tau (corrected for ties)	0.428571			Tau (corrected for ties)	-0.414039			Tau (corrected for ties)	-0.642857			Tau (corrected for ties)	-0.357143			Tau (corrected for ties)	-0.214286			Tau (corrected for ties)	0.276026			Tau (corrected for ties)	-0.828079			Tau (corrected for ties)	0.414039			Tau (corrected for ties)	-0.276026			Tau (corrected for ties)	0.138013			Tau (corrected for ties)	0.414039
Normal Approximation Method				Normal Approximation Method				Normal Approximation Method				Normal Approximation Method				Normal Approximation Method				Normal Approximation Method				Normal Approximation Method				Normal Approximation Method				Normal Approximation Method				Normal Approximation Method				Normal Approximation Method				Normal Approximation Method
Caution: the probabilities given are approximates for large N.				Caution: the probabilities given are approximates for large N.				Caution: the probabilities given are approximates for large N.				Caution: the probabilities given are approximates for large N.				Caution: the probabilities given are approximates for large N.				Caution: the probabilities given are approximates for large N.				Caution: the probabilities given are approximates for large N.				Caution: the probabilities given are approximates for large N.				Caution: the probabilities given are approximates for large N.				Caution: the probabilities given are approximates for large N.				Caution: the probabilities given are approximates for large N.				Caution: the probabilities given are approximates for large N.
Z	0.973124			Z	1.16775			Z	-1.14764			Z	-1.75162			Z	-0.973124			Z	-0.583874			Z	0.765092			Z	-2.29528			Z	1.14764			Z	-0.765092			Z	0.382546			Z	1.14764
With Continuity Correction (for ABS(Z)<=2)				With Continuity Correction (for ABS(Z)<=2)				With Continuity Correction (for ABS(Z)<=2)				With Continuity Correction (for ABS(Z)<=2)				With Continuity Correction (for ABS(Z)<=2)				With Continuity Correction (for ABS(Z)<=2)				With Continuity Correction (for ABS(Z)<=2)				With Continuity Correction (for ABS(Z)<=2)				With Continuity Correction (for ABS(Z)<=2)				With Continuity Correction (for ABS(Z)<=2)				With Continuity Correction (for ABS(Z)<=2)				With Continuity Correction (for ABS(Z)<=2)
Upper Probability	0.1906			Upper Probability	0.1422			Upper Probability	0.8931			Upper Probability	0.9678			Upper Probability	0.8578			Upper Probability	0.7521			Upper Probability	0.2516			Upper Probability	0.9916			Upper Probability	0.1464			Upper Probability	0.8053			Upper Probability	0.3871			Upper Probability	0.1464
Lower Probability	0.8578			Lower Probability	0.8971			Lower Probability	0.1464			Lower Probability	0.04903			Lower Probability	0.1906			Lower Probability	0.3133			Lower Probability	0.8053			Lower Probability	0.01392			Lower Probability	0.8931			Lower Probability	0.2516			Lower Probability	0.6837			Lower Probability	0.8931
Two-sided Probability	0.3811	Not Significant (P>0.05) (two-sided)		Two-sided Probability	0.2844	Not Significant (P>0.05) (two-sided)		Two-sided Probability	0.2928	Not Significant (P>0.05) (two-sided)		Two-sided Probability	0.09806	Not Significant (P>0.05) (two-sided)		Two-sided Probability	0.3811	Not Significant (P>0.05) (two-sided)		Two-sided Probability	0.6266	Not Significant (P>0.05) (two-sided)		Two-sided Probability	0.5032	Not Significant (P>0.05) (two-sided)		Two-sided Probability	0.02783	* (P<=0.05) (two-sided)		Two-sided Probability	0.2928	Not Significant (P>0.05) (two-sided)		Two-sided Probability	0.5032	Not Significant (P>0.05) (two-sided)		Two-sided Probability	0.7742	Not Significant (P>0.05) (two-sided)		Two-sided Probability	0.2928	Not Significant (P>0.05) (two-sided)
Without Continuity Correction (for ABS(Z)>2)				Without Continuity Correction (for ABS(Z)>2)				Without Continuity Correction (for ABS(Z)>2)				Without Continuity Correction (for ABS(Z)>2)				Without Continuity Correction (for ABS(Z)>2)				Without Continuity Correction (for ABS(Z)>2)				Without Continuity Correction (for ABS(Z)>2)				Without Continuity Correction (for ABS(Z)>2)				Without Continuity Correction (for ABS(Z)>2)				Without Continuity Correction (for ABS(Z)>2)				Without Continuity Correction (for ABS(Z)>2)				Without Continuity Correction (for ABS(Z)>2)
Upper Probability	0.1652			Upper Probability	0.1215			Upper Probability	0.8744			Upper Probability	0.9601			Upper Probability	0.8348			Upper Probability	0.7203			Upper Probability	0.2221			Upper Probability	0.9891			Upper Probability	0.1256			Upper Probability	0.7779			Upper Probability	0.351			Upper Probability	0.1256
Lower Probability	0.8348			Lower Probability	0.8785			Lower Probability	0.1256			Lower Probability	0.03992			Lower Probability	0.1652			Lower Probability	0.2797			Lower Probability	0.7779			Lower Probability	0.01086			Lower Probability	0.8744			Lower Probability	0.2221			Lower Probability	0.649			Lower Probability	0.8744
Two-sided Probability	0.3305	Not Significant (P>0.05) (two-sided)		Two-sided Probability	0.2429	Not Significant (P>0.05) (two-sided)		Two-sided Probability	0.2511	Not Significant (P>0.05) (two-sided)		Two-sided Probability	0.07984	Not Significant (P>0.05) (two-sided)		Two-sided Probability	0.3305	Not Significant (P>0.05) (two-sided)		Two-sided Probability	0.5593	Not Significant (P>0.05) (two-sided)		Two-sided Probability	0.4442	Not Significant (P>0.05) (two-sided)		Two-sided Probability	0.02172	* (P<=0.05) (two-sided)		Two-sided Probability	0.2511	Not Significant (P>0.05) (two-sided)		Two-sided Probability	0.4442	Not Significant (P>0.05) (two-sided)		Two-sided Probability	0.7021	Not Significant (P>0.05) (two-sided)		Two-sided Probability	0.2511	Not Significant (P>0.05) (two-sided)
Exact Method(Not corrected for ties)				Exact Method(Not corrected for ties)				Exact Method(Not corrected for ties)				Exact Method(Not corrected for ties)				Exact Method(Not corrected for ties)				Exact Method(Not corrected for ties)				Exact Method(Not corrected for ties)				Exact Method(Not corrected for ties)				Exact Method(Not corrected for ties)				Exact Method(Not corrected for ties)				Exact Method(Not corrected for ties)				Exact Method(Not corrected for ties)
Upper Probability	0.2347			Upper Probability	0.2347			Upper Probability	0.2347			Upper Probability	0.06806			Upper Probability	0.2347			Upper Probability	0.3597			Upper Probability	0.3597			Upper Probability	0.02778			Upper Probability	0.2347			Upper Probability	0.3597			Upper Probability	0.5			Upper Probability	0.2347
Lower Probability	0.7653			Lower Probability	0.7653			Lower Probability	0.7653			Lower Probability	0.9319			Lower Probability	0.7653			Lower Probability	0.6403			Lower Probability	0.6403			Lower Probability	0.9722			Lower Probability	0.7653			Lower Probability	0.6403			Lower Probability	0.5			Lower Probability	0.7653
Two-sided Probability	0.4694	Not Significant (P>0.05) (two-sided)		Two-sided Probability	0.4694	Not Significant (P>0.05) (two-sided)		Two-sided Probability	0.4694	Not Significant (P>0.05) (two-sided)		Two-sided Probability	0.1361	Not Significant (P>0.05) (two-sided)		Two-sided Probability	0.4694	Not Significant (P>0.05) (two-sided)		Two-sided Probability	0.7194	Not Significant (P>0.05) (two-sided)		Two-sided Probability	0.7194	Not Significant (P>0.05) (two-sided)		Two-sided Probability	0.05556	Not Significant (P>0.05) (two-sided)		Two-sided Probability	0.4694	Not Significant (P>0.05) (two-sided)		Two-sided Probability	0.7194	Not Significant (P>0.05) (two-sided)		Two-sided Probability	1	Not Significant (P>0.05) (two-sided)		Two-sided Probability	0.4694	Not Significant (P>0.05) (two-sided)
Cort Post-eff	T4-test 1			Cort Post-eff	T4 -test 2			Cort Post-eff	T4-test 3			Cort Post-eff	T4a-test 4			Cort Post-eff	T4b- test 4			Cort Post-eff	T4c-test 4			Cort Post-eff	TM-Cp.			Cort Post-eff	Limf-B			Cort Post-eff	Glu-B			Cort Post-eff	Norep-B			Cort Post-eff	Prol-B			Cort Post-eff	Cort-B
14.6	40			14.6	24			14.6	26			14.6	10			14.6	7			14.6	8			14.6	74.97			14.6	46.3			14.6	83			14.6	1.6			14.6	6.69			14.6	15.8
16.5	34			16.5	26			16.5	15			16.5	4			16.5	5			16.5	7			16.5	63.94			16.5	40.7			16.5	87			16.5	3.8			16.5	7.25			16.5	14.7
13.3	30			13.3	24			13.3	22			13.3	9			13.3	5			13.3	12			13.3	77.71			13.3	41			13.3	91			13.3	3.07			13.3	4.92			13.3	12.9
13.9	38			13.9	23			13.9	13			13.9	8			13.9	6			13.9	10			13.9	72.33			13.9	49.2			13.9	85			13.9	3.01			13.9	6.53			13.9	12
22.5	28			22.5	22			22.5	28			22.5	12			22.5	9			22.5	8			22.5	66.76			22.5	56.7			22.5	84			22.5	4.16			22.5	7.87			22.5	9.49
13.4	40			13.4	21			13.4	21			13.4	8			13.4	8			13.4	9			13.4	77.91			13.4	33.8			13.4	109			13.4	1.06			13.4	9.15			13.4	10.6
Nonparametric Correlation				Nonparametric Correlation				Nonparametric Correlation				Nonparametric Correlation				Nonparametric Correlation				Nonparametric Correlation				Nonparametric Correlation				Nonparametric Correlation				Nonparametric Correlation				Nonparametric Correlation				Nonparametric Correlation				Nonparametric Correlation
Spearman Rank Correlation				Spearman Rank Correlation				Spearman Rank Correlation				Spearman Rank Correlation				Spearman Rank Correlation				Spearman Rank Correlation				Spearman Rank Correlation				Spearman Rank Correlation				Spearman Rank Correlation				Spearman Rank Correlation				Spearman Rank Correlation				Spearman Rank Correlation
Statistic	68			Statistic	75.5			Statistic	79			Statistic	77.5			Statistic	80			Statistic	59			Statistic	59			Statistic	82			Statistic	62			Statistic	84			Statistic	81			Statistic	72
Mean	73.5			Mean	73.5			Mean	73.5			Mean	73.5			Mean	73.5			Mean	73.5			Mean	73.5			Mean	73.5			Mean	73.5			Mean	73.5			Mean	73.5			Mean	73.5
Variance	59.5			Variance	59.5			Variance	61.25			Variance	59.5			Variance	59.5			Variance	59.5			Variance	61.25			Variance	61.25			Variance	61.25			Variance	61.25			Variance	61.25			Variance	61.25
Rho (corrected for ties)	-0.318874			Rho (corrected for ties)	0.115954			Rho (corrected for ties)	0.314286			Rho (corrected for ties)	0.231908			Rho (corrected for ties)	0.376851			Rho (corrected for ties)	-0.840668			Rho (corrected for ties)	-0.828571			Rho (corrected for ties)	0.485714			Rho (corrected for ties)	-0.657143			Rho (corrected for ties)	0.6			Rho (corrected for ties)	0.428571			Rho (corrected for ties)	-0.0857143
Exact Method				Exact Method				Exact Method				Exact Method				Exact Method				Exact Method				Exact Method				Exact Method				Exact Method				Exact Method				Exact Method				Exact Method
Upper Probability	0.9986			Upper Probability	0.9986			Upper Probability	0.9986			Upper Probability	0.9986			Upper Probability	0.9986			Upper Probability	0.9986			Upper Probability	0.9986			Upper Probability	0.9986			Upper Probability	0.9986			Upper Probability	0.9986			Upper Probability	0.9986			Upper Probability	0.9986
Lower Probability	0.001389			Lower Probability	0.001389			Lower Probability	0.001389			Lower Probability	0.001389			Lower Probability	0.001389			Lower Probability	0.001389			Lower Probability	0.001389			Lower Probability	0.001389			Lower Probability	0.001389			Lower Probability	0.001389			Lower Probability	0.001389			Lower Probability	0.001389
Two-sided Probability	0.002778	** (P<=0.01) (two-sided)		Two-sided Probability	0.002778	** (P<=0.01) (two-sided)		Two-sided Probability	0.002778	** (P<=0.01) (two-sided)		Two-sided Probability	0.002778	** (P<=0.01) (two-sided)		Two-sided Probability	0.002778	** (P<=0.01) (two-sided)		Two-sided Probability	0.002778	** (P<=0.01) (two-sided)		Two-sided Probability	0.002778	** (P<=0.01) (two-sided)		Two-sided Probability	0.002778	** (P<=0.01) (two-sided)		Two-sided Probability	0.002778	** (P<=0.01) (two-sided)		Two-sided Probability	0.002778	** (P<=0.01) (two-sided)		Two-sided Probability	0.002778	** (P<=0.01) (two-sided)		Two-sided Probability	0.002778	** (P<=0.01) (two-sided)
Kendall Rank Correlation				Kendall Rank Correlation				Kendall Rank Correlation				Kendall Rank Correlation				Kendall Rank Correlation				Kendall Rank Correlation				Kendall Rank Correlation				Kendall Rank Correlation				Kendall Rank Correlation				Kendall Rank Correlation				Kendall Rank Correlation				Kendall Rank Correlation
Statistic	-4			Statistic	2			Statistic	3			Statistic	2			Statistic	4			Statistic	-10			Statistic	-9			Statistic	5			Statistic	-7			Statistic	7			Statistic	7			Statistic	-1
Mean	0			Mean	0			Mean	0			Mean	0			Mean	0			Mean	0			Mean	0			Mean	0			Mean	0			Mean	0			Mean	0			Mean	0
Variance	27.3333			Variance	27.3333			Variance	28.3333			Variance	27.3333			Variance	27.3333			Variance	27.3333			Variance	28.3333			Variance	28.3333			Variance	28.3333			Variance	28.3333			Variance	28.3333			Variance	28.3333
Tau (corrected for ties)	-0.276026			Tau (corrected for ties)	0.138013			Tau (corrected for ties)	0.2			Tau (corrected for ties)	0.138013			Tau (corrected for ties)	0.276026			Tau (corrected for ties)	-0.690066			Tau (corrected for ties)	-0.6			Tau (corrected for ties)	0.333333			Tau (corrected for ties)	-0.466667			Tau (corrected for ties)	0.466667			Tau (corrected for ties)	0.466667			Tau (corrected for ties)	-0.0666667
Normal Approximation Method				Normal Approximation Method				Normal Approximation Method				Normal Approximation Method				Normal Approximation Method				Normal Approximation Method				Normal Approximation Method				Normal Approximation Method				Normal Approximation Method				Normal Approximation Method				Normal Approximation Method				Normal Approximation Method
Caution: the probabilities given are approximates for large N.				Caution: the probabilities given are approximates for large N.				Caution: the probabilities given are approximates for large N.				Caution: the probabilities given are approximates for large N.				Caution: the probabilities given are approximates for large N.				Caution: the probabilities given are approximates for large N.				Caution: the probabilities given are approximates for large N.				Caution: the probabilities given are approximates for large N.				Caution: the probabilities given are approximates for large N.				Caution: the probabilities given are approximates for large N.				Caution: the probabilities given are approximates for large N.				Caution: the probabilities given are approximates for large N.
Z	-0.765092			Z	0.382546			Z	0.563602			Z	0.382546			Z	0.765092			Z	-1.91273			Z	-1.69081			Z	0.939336			Z	-1.31507			Z	1.31507			Z	1.31507			Z	-0.187867
With Continuity Correction (for ABS(Z)<=2)				With Continuity Correction (for ABS(Z)<=2)				With Continuity Correction (for ABS(Z)<=2)				With Continuity Correction (for ABS(Z)<=2)				With Continuity Correction (for ABS(Z)<=2)				With Continuity Correction (for ABS(Z)<=2)				With Continuity Correction (for ABS(Z)<=2)				With Continuity Correction (for ABS(Z)<=2)				With Continuity Correction (for ABS(Z)<=2)				With Continuity Correction (for ABS(Z)<=2)				With Continuity Correction (for ABS(Z)<=2)				With Continuity Correction (for ABS(Z)<=2)
Upper Probability	0.8053			Upper Probability	0.3871			Upper Probability	0.3193			Upper Probability	0.3871			Upper Probability	0.2516			Upper Probability	0.9777			Upper Probability	0.9628			Upper Probability	0.1989			Upper Probability	0.9206			Upper Probability	0.111			Upper Probability	0.111			Upper Probability	0.611
Lower Probability	0.2516			Lower Probability	0.6837			Lower Probability	0.7446			Lower Probability	0.6837			Lower Probability	0.8053			Lower Probability	0.0346			Lower Probability	0.05515			Lower Probability	0.8493			Lower Probability	0.111			Lower Probability	0.9206			Lower Probability	0.9206			Lower Probability	0.4626
Two-sided Probability	0.5032	Not Significant (P>0.05) (two-sided)		Two-sided Probability	0.7742	Not Significant (P>0.05) (two-sided)		Two-sided Probability	0.6386	Not Significant (P>0.05) (two-sided)		Two-sided Probability	0.7742	Not Significant (P>0.05) (two-sided)		Two-sided Probability	0.5032	Not Significant (P>0.05) (two-sided)		Two-sided Probability	0.0692	Not Significant (P>0.05) (two-sided)		Two-sided Probability	0.1103	Not Significant (P>0.05) (two-sided)		Two-sided Probability	0.3979	Not Significant (P>0.05) (two-sided)		Two-sided Probability	0.222	Not Significant (P>0.05) (two-sided)		Two-sided Probability	0.222	Not Significant (P>0.05) (two-sided)		Two-sided Probability	0.222	Not Significant (P>0.05) (two-sided)		Two-sided Probability	0.9252	Not Significant (P>0.05) (two-sided)
Without Continuity Correction (for ABS(Z)>2)				Without Continuity Correction (for ABS(Z)>2)				Without Continuity Correction (for ABS(Z)>2)				Without Continuity Correction (for ABS(Z)>2)				Without Continuity Correction (for ABS(Z)>2)				Without Continuity Correction (for ABS(Z)>2)				Without Continuity Correction (for ABS(Z)>2)				Without Continuity Correction (for ABS(Z)>2)				Without Continuity Correction (for ABS(Z)>2)				Without Continuity Correction (for ABS(Z)>2)				Without Continuity Correction (for ABS(Z)>2)				Without Continuity Correction (for ABS(Z)>2)
Upper Probability	0.7779			Upper Probability	0.351			Upper Probability	0.2865			Upper Probability	0.351			Upper Probability	0.2221			Upper Probability	0.9721			Upper Probability	0.9546			Upper Probability	0.1738			Upper Probability	0.9058			Upper Probability	0.09424			Upper Probability	0.09424			Upper Probability	0.5745
Lower Probability	0.2221			Lower Probability	0.649			Lower Probability	0.7135			Lower Probability	0.649			Lower Probability	0.7779			Lower Probability	0.02789			Lower Probability	0.04544			Lower Probability	0.8262			Lower Probability	0.09424			Lower Probability	0.9058			Lower Probability	0.9058			Lower Probability	0.4255
Two-sided Probability	0.4442	Not Significant (P>0.05) (two-sided)		Two-sided Probability	0.7021	Not Significant (P>0.05) (two-sided)		Two-sided Probability	0.573	Not Significant (P>0.05) (two-sided)		Two-sided Probability	0.7021	Not Significant (P>0.05) (two-sided)		Two-sided Probability	0.4442	Not Significant (P>0.05) (two-sided)		Two-sided Probability	0.05578	Not Significant (P>0.05) (two-sided)		Two-sided Probability	0.09087	Not Significant (P>0.05) (two-sided)		Two-sided Probability	0.3476	Not Significant (P>0.05) (two-sided)		Two-sided Probability	0.1885	Not Significant (P>0.05) (two-sided)		Two-sided Probability	0.1885	Not Significant (P>0.05) (two-sided)		Two-sided Probability	0.1885	Not Significant (P>0.05) (two-sided)		Two-sided Probability	0.851	Not Significant (P>0.05) (two-sided)
Exact Method(Not corrected for ties)				Exact Method(Not corrected for ties)				Exact Method(Not corrected for ties)				Exact Method(Not corrected for ties)				Exact Method(Not corrected for ties)				Exact Method(Not corrected for ties)				Exact Method(Not corrected for ties)				Exact Method(Not corrected for ties)				Exact Method(Not corrected for ties)				Exact Method(Not corrected for ties)				Exact Method(Not corrected for ties)				Exact Method(Not corrected for ties)
Upper Probability	0.3597			Upper Probability	0.5			Upper Probability	0.3597			Upper Probability	0.5			Upper Probability	0.3597			Upper Probability	0.06806			Upper Probability	0.06806			Upper Probability	0.2347			Upper Probability	0.1361			Upper Probability	0.1361			Upper Probability	0.1361			Upper Probability	0.5
Lower Probability	0.6403			Lower Probability	0.5			Lower Probability	0.6403			Lower Probability	0.5			Lower Probability	0.6403			Lower Probability	0.9319			Lower Probability	0.9319			Lower Probability	0.7653			Lower Probability	0.8639			Lower Probability	0.8639			Lower Probability	0.8639			Lower Probability	0.5
Two-sided Probability	0.7194	Not Significant (P>0.05) (two-sided)		Two-sided Probability	1	Not Significant (P>0.05) (two-sided)		Two-sided Probability	0.7194	Not Significant (P>0.05) (two-sided)		Two-sided Probability	1	Not Significant (P>0.05) (two-sided)		Two-sided Probability	0.7194	Not Significant (P>0.05) (two-sided)		Two-sided Probability	0.1361	Not Significant (P>0.05) (two-sided)		Two-sided Probability	0.1361	Not Significant (P>0.05) (two-sided)		Two-sided Probability	0.4694	Not Significant (P>0.05) (two-sided)		Two-sided Probability	0.2722	Not Significant (P>0.05) (two-sided)		Two-sided Probability	0.2722	Not Significant (P>0.05) (two-sided)		Two-sided Probability	0.2722	Not Significant (P>0.05) (two-sided)		Two-sided Probability	1	Not Significant (P>0.05) (two-sided)
